# Supplementary material for: Management of Hyperglycemia in Type 2 Diabetes, 2018. A Consensus Report by the American Diabetes Association (ADA) and the European Association for the Study of Diabetes (EASD)
Source: Oxford University Press journal article supplement (doi:10.2337/dci18-0033), 2018-10-05
Supplement: dci180033supplementarydata.xlsx [file dci180033supplementarydata.xlsx]

## Sheet: Search Strategy
	Categories	String	#
	Population	Diabetes[Title/Abstract]	1
		Type 2[Title/Abstract]	2
		Animal*[Title/Abstract]	3
		Mice[Title]	4
		Mouse[Title]	5
		Rat*[Title]	6
		Comment*[Title]	7
	Design/Intervention	Random*[Title/Abstract]	8
		Trial*[Title/Abstract]	9
		Review[ptyp]	10
		Pharmacodynamic*[Title]	11
		Pharmacokinetic*[Title]	12
	#1) 1 AND 2 NOT (3 OR 4 OR 5 OR 6 OR 7) AND (8 OR 9) NOT (10 OR 11 OR 12)
	Categories	String	#
	Population	Diabetes[Title/Abstract]	13
		Type 2[Title/Abstract]	14
	Design/Intervention	Meta[Title]	15
		Indirect[Title]	16
		Mixed[Title]	17
	#2) 13 AND 14 AND (15 OR 16 OR 17)
	PubMed Query
	((((((Diabetes[Title/Abstract] AND Type 2[Title/Abstract])) NOT (Animal*[Title/Abstract] OR Mice[Title] OR Mouse[Title] OR Rat*[Title] OR Comment*[Title])) AND (Random*[Title/Abstract] OR Trial*[Title/Abstract])) NOT (Review[ptyp] OR Pharmacodynamic*[Title] OR Pharmacokinetic*[Title]))) OR (((Diabetes[Title/Abstract] AND Type 2[Title/Abstract])) AND (Meta[Title] OR Indirect[Title] OR Mixed[Title]…
	Intervention studies <6 months excluded

## Sheet: Search Results
				Included by			Classification and Subclassification
Title	Short details	PubMed ID		Title/Abstract	Full Text		A	B	C	D		Source	Multiple_Class	Duplicate_expopinion
SGLT-2 inhibitors and the risk of infections: a systematic review and meta-analysis of randomized controlled trials.	Acta Diabetol. 2018	29484489		1	1		-	-	10	-		PubMed	1	0
Efficacy and Safety of IDegLira Versus Basal-Bolus Insulin Therapy in Patients With Type 2 Diabetes Uncontrolled on Metformin and Basal Insulin; DUAL VII Randomized Clinical Trial.	Diabetes Care. 2018	29483185		1	1		-	-	-	2		PubMed	1	0
Dulaglutide as add-on therapy to SGLT2 inhibitors in patients with inadequately controlled type 2 diabetes (AWARD-10): a 24-week, randomised, double-blind, placebo-controlled trial.	Lancet Diabetes Endocrinol. 2018	29483060		1	1		-	-	-	22		PubMed	1	0
Comparing SGLT-2 inhibitors to DPP-4 inhibitors as an add-on therapy to metformin in patients with type 2 diabetes: A systematic review and meta-analysis.	Diabetes Metab. 2018	29477373		1	1		-	-	-	16		PubMed	1	0
Ertugliflozin: First Global Approval.	Drugs. 2018	29476348		1	1		-	-	10	-		PubMed	1	0
Effect of exenatide QW or placebo, both added to titrated insulin glargine, in uncontrolled type 2 diabetes: the DURATION-7 randomized study.	Diabetes Obes Metab. 2018	29473704		1	1		-	-	-	3		PubMed	1	0
Efficacy and safety of combination therapy with SGLT2 and DPP4 inhibitors in the treatment of type 2 diabetes: A systematic review and meta-analysis.	Diabetes Metab. 2018	29449146		1	1		-	-	-	16		PubMed	1	0
Clinical and Patient-Centered Outcomes in Obese Type 2 Diabetes Patients 3 Years After Randomization to Roux-en-Y Gastric Bypass Surgery Versus Intensive Lifestyle Management: The SLIMM-T2D Study.	Diabetes Care. 2018	29432125		1	1		-	5	-	-		PubMed	1	0
Comparative safety and efficacy of insulin degludec with insulin glargine in type 2 and type 1 diabetes: a meta-analysis of randomized controlled trials.	Acta Diabetol. 2018	29423761		1	1		-	-	7	-		PubMed	1	0
Long-term efficacy and safety of ertugliflozin monotherapy in patients with inadequately controlled T2DM despite diet and exercise: VERTIS MONO extension study.	Diabetes Obes Metab. 2018	29419917		1	1		-	-	10	-		PubMed	1	0
Meta-analysis of metabolic surgery versus medical treatment for microvascular complications in patients with type 2 diabetes mellitus.	Br J Surg. 2018	29405276		1	1		-	5	-	-		PubMed	1	0
Semaglutide versus dulaglutide once weekly in patients with type 2 diabetes (SUSTAIN 7): a randomised, open-label, phase 3b trial.	Lancet Diabetes Endocrinol. 2018	29397376		1	1		-	-	8	-		PubMed	1	0
Cost-effectiveness analysis of metformin+dipeptidyl peptidase-4 inhibitors compared to metformin+sulfonylureas for treatment of type 2 diabetes.	BMC Health Serv Res. 2018	29391064		1	1		-	-	-	9		PubMed	1	0
Efficacy and safety of sodium-glucose cotransporter 2 inhibitors as add-on to metformin and sulfonylurea treatment for the management of type 2 diabetes: a meta-analysis.	Endocr J. 2018	29375082		1	1		-	-	14	-		PubMed	1	0
Effects of the sodium-glucose co-transporter 2 inhibitor dapagliflozin in patients with type 2 diabetes and Stages 3b-4 chronic kidney disease.	Nephrol Dial Transplant. 2018	29370424		1	1		-	4	-	-		PubMed	1	0
Efficacy of glucagon-like peptide-1 receptor agonists compared to dipeptidyl peptidase-4 inhibitors for the management of type 2 diabetes: A meta-analysis of randomized clinical trials.	Diabetes Obes Metab. 2018	29364587		1	1		-	-	-	5		PubMed	1	0
Cardiovascular Safety, Long-Term Noncardiovascular Safety, and Efficacy of Sodium-Glucose Cotransporter 2 Inhibitors in Patients With Type 2 Diabetes Mellitus: A Systemic Review and Meta-Analysis With Trial Sequential Analysis.	J Am Heart Assoc. 2018	29353233		1	1		-	-	10	-		PubMed	1	0
Effectiveness of smartphone technologies on glycaemic control in patients with type 2 diabetes: systematic review with meta-analysis of 17 trials.	Obes Rev. 2018	29345109		1	1		-	-	-	12		PubMed	1	0
DECLARE-TIMI 58: Participants' baseline characteristics.	Diabetes Obes Metab. 2018	29322605		1	1		-	1	-	-		PubMed	1	0
Effects of exenatide once weekly plus dapagliflozin, exenatide once weekly, or dapagliflozin, added to metformin monotherapy, on body weight, systolic blood pressure, and triglycerides in patients with type 2 diabetes in the DURATION-8 study.	Diabetes Obes Metab. 2018	29316164		1	1		-	-	-	22		PubMed	1	0
Ertugliflozin and Sitagliptin Co-initiation in Patients with Type 2 Diabetes: The VERTIS SITA Randomized Study.	Diabetes Ther. 2018	29313282		1	1		-	-	-	4		PubMed	1	0
A network meta-analysis on the comparative efficacy of different dietary approaches on glycaemic control in patients with type 2 diabetes mellitus.	Eur J Epidemiol. 2018	29302846		1	1		-	-	2	-		PubMed	1	0
Ertugliflozin Compared with Glimepiride in Patients with Type 2 Diabetes Mellitus Inadequately Controlled on Metformin: The VERTIS SU Randomized Study.	Diabetes Ther. 2018	29282633		1	1		-	-	14	-		PubMed	1	0
Characteristics Associated With Decreased or Increased Mortality Risk From Glycemic Therapy Among Patients With Type 2 Diabetes and High Cardiovascular Risk: Machine Learning Analysis of the ACCORD Trial.	Diabetes Care. 2018	29279299		1	1		3	-	-	-		PubMed	1	0
The interpretation and effect of a low-carbohydrate diet in the management of type 2 diabetes: a systematic review and meta-analysis of randomised controlled trials.	Eur J Clin Nutr. 2017	29269890		1	1		-	-	2	-		PubMed	1	0
Ertugliflozin plus sitagliptin versus either individual agent over 52 weeks in patients with type 2 diabetes mellitus inadequately controlled with metformin: The VERTIS FACTORIAL randomized trial.	Diabetes Obes Metab. 2017	29266675		1	1		-	-	-	4		PubMed	1	0
Efficacy and Safety of Once-Weekly Semaglutide Versus Exenatide ER in Subjects With Type 2 Diabetes (SUSTAIN 3): A 56-Week, Open-Label, Randomized Clinical Trial.	Diabetes Care. 2018	29246950		1	1		-	-	8	-		PubMed	1	0
Efficacy and Safety of Biosimilar SAR342434 Insulin Lispro in Adults with Type 2 Diabetes, Also Using Insulin Glargine: SORELLA 2 Study.	Diabetes Technol Ther. 2018	29232162		1	1		-	-	7	-		PubMed	1	0
Cardiovascular outcomes with glucagon-like peptide-1 receptor agonists in patients with type 2 diabetes: a meta-analysis.	Lancet Diabetes Endocrinol. 2018	29221659		1	1		-	-	8	-		PubMed	1	0
Comparison between SGLT2 inhibitors and pioglitazone as additions to insulin therapy in type 2 diabetes: a systematic review with an indirect comparison meta-analysis.	J Diabetes Investig. 2017	29215196		1	1		-	-	-	7		PubMed	1	0
Cardiovascular Outcomes According to Urinary Albumin and Kidney Disease in Patients With Type 2 Diabetes at High Cardiovascular Risk: Observations From the SAVOR-TIMI 53 Trial.	JAMA Cardiol. 2018	29214305		1	1		-	3	-	-		PubMed	1	0
The effects of dipeptidyl peptidase-4 inhibitors on bone fracture among patients with type 2 diabetes mellitus: A network meta-analysis of randomized controlled trials.	PLoS One. 2017	29206832		1	1		-	-	9	-		PubMed	1	0
Comparison of glucose-lowering agents following dual therapy failure in type 2 diabetes Systematic review and network meta-analysis of randomised controlled trials.	Diabetes Obes Metab. 2017	29205774		1	1		-	-	-	21		PubMed	1	0
How Does Empagliflozin Reduce Cardiovascular Mortality? Insights From a Mediation Analysis of the EMPA-REG OUTCOME Trial.	Diabetes Care. 2018	29203583		1	1		-	1	-	-		PubMed	1	0
Ertugliflozin in Patients with Stage 3 Chronic Kidney Disease and Type 2 Diabetes Mellitus: The VERTIS RENAL Randomized Study.	Diabetes Ther. 2018	29159457		1	1		-	4	-	-		PubMed	1	0
Efficacy and safety of the glucagon-like peptide-1 receptor agonist lixisenatide versus the dipeptidyl peptidase-4 inhibitor sitagliptin in young (<50 years) obese patients with type 2 diabetes mellitus.	J Clin Transl Endocrinol. 2014	29159080		1	1		-	7	-	-		PubMed	1	0
Cost-utility of empagliflozin in patients with type 2 diabetes at high cardiovascular risk.	J Diabetes Complications. 2018	29157870		1	1		-	-	10	-		PubMed	1	0
A comparison of adherence and persistence by medication class in type 2 diabetes: A systematic review and meta-analysis.	Diabetes Obes Metab. 2017	29135080		1	1		-	-	-	27		PubMed	1	0
Canagliflozin for Primary and Secondary Prevention of Cardiovascular Events: Results From the CANVAS Program (Canagliflozin Cardiovascular Assessment Study).	Circulation. 2017	29133604		1	1		-	1	-	-		PubMed	1	0
A 32-Week Randomized Comparison of Stepwise Insulin Intensification of Biphasic Insulin Aspart (BIAspÂ 30) Versus Basal-Bolus Therapy in Insulin-NaÃ¯ve Patients with Type 2 Diabetes.	Diabetes Ther. 2017	29129018		1	1		-	-	-	1		PubMed	1	0
Efficacy and safety of glucagon-like peptide-1 agonists on macrovascular and microvascular events in type 2 diabetes mellitus: A meta-analysis.	Nutr Metab Cardiovasc Dis. 2017	29113708		1	1		-	2	-	-		PubMed	1	0
INSULIN GLARGINE 300 U/ML IS ASSOCIATED WITH LESS WEIGHT GAIN WHILE MAINTAINING GLYCEMIC CONTROL AND LOW RISK OF HYPOGLYCEMIA COMPARED WITH INSULIN GLARGINE 100 U/ML IN AN AGING POPULATION WITH TYPE 2 DIABETES.	Endocr Pract. 2018	29106816		1	1		-	-	7	-		PubMed	1	0
Long-term follow-up of intensive glycaemic control on renal outcomes in the Veterans Affairs Diabetes Trial (VADT).	Diabetologia. 2018	29101421		1	1		-	3	-	-		PubMed	1	0
Direct head-to-head comparison of glycaemic durability of dipeptidyl peptidase-4 inhibitors and sulphonylureas in patients with type 2 diabetes mellitus: A meta-analysis of long-term randomized controlled trials.	Diabetes Obes Metab. 2017	29095568		1	1		-	-	-	9		PubMed	1	0
Comparison between insulin degludec/liraglutide treatment and insulin glargine/lixisenatide treatment in type 2 diabetes: a systematic review and meta-analysis.	Expert Opin Pharmacother. 2017	29090600		1	1		-	-	-	2		PubMed	1	0
Changes in Albuminuria and the Risk of Major Clinical Outcomes in Diabetes: Results From ADVANCE-ON.	Diabetes Care. 2018	29079715		1	1		-	3	-	-		PubMed	1	0
Effect of an intensified multifactorial intervention on cardiovascular outcomes and mortality in type 2 diabetes (J-DOIT3): an open-label, randomised controlled trial.	Lancet Diabetes Endocrinol. 2017	29079252		1	1		-	1	-	-		PubMed	1	0
Treatment satisfaction with ITCA 650, a novel drug-device delivering continuous exenatide, versus twice-daily injections of exenatide in type 2 diabetics using metformin.	Diabetes Obes Metab. 2017	29053202		1	1		-	-	8	-		PubMed	1	0
Addition of dipeptidyl peptidase-4 inhibitors to insulin treatment in type 2 diabetes patients: A meta-analysis.	J Diabetes Investig. 2017	29047219		1	1		-	-	-	14		PubMed	1	0
No disparity of the efficacy and all-cause mortality between Asian and non-Asian type 2 diabetes patients with sodium-glucose cotransporter 2 inhibitors treatment: A meta-analysis.	J Diabetes Investig. 2017	29029369		1	1		-	9	-	-		PubMed	1	0
Effects of empagliflozin on risk for cardiovascular death and heart failure hospitalization across the spectrum of heart failure risk in the EMPA-REG OUTCOMEÂ® trial.	Eur Heart J. 2017	29020355		1	1		-	6	-	-		PubMed	1	0
The Effect of Improved Serum 25-Hydroxyvitamin D Status on Glycemic Control in Diabetic Patients: A Meta-Analysis.	J Clin Endocrinol Metab. 2017	28957454		1	1		-	-	1	-		PubMed	1	0
Web-based self-management support for people with type 2 diabetes (HeLP-Diabetes): randomised controlled trial in English primary care.	BMJ Open. 2017	28954789		1	1		-	-	-	19		PubMed	1	0
Efficacy and safety of liraglutide versus sitagliptin both in combination with metformin in patients with type 2 diabetes: A systematic review and meta-analysis.	Medicine (Baltimore). 2017	28953663		1	1		-	-	-	5		PubMed	1	0
Efficacy and safety of combination therapy with an Î±-glucosidase inhibitor and a dipeptidyl peptidase-4 inhibitor in patients with type 2 diabetes mellitus: A systematic review with meta-analysis.	J Diabetes Investig. 2017	28950431		1	1		-	-	-	23		PubMed	1	0
Dapagliflozin in patients with type 2 diabetes mellitus: A pooled analysis of safety data from phase IIb/III clinical trials.	Diabetes Obes Metab. 2017	28950419		1	1		-	-	10	-		PubMed	1	0
Premixed vs basal-bolus insulin regimen in Type 2 diabetes: comparison of clinical outcomes from randomized controlled trials and real-world data.	Diabet Med. 2017	28945928		1	1		-	-	-	1		PubMed	1	0
The effect of nurse prescribers on glycaemic control in type 2 diabetes: A systematic review and meta-analysis.	Int J Nurs Stud. 2017	28939342		1	1		-	-	-	13		PubMed	1	0
Multimedia education program and nutrition therapy improves HbA1c, weight, and lipid profile of patients with type 2 diabetes: a randomized clinical trial.	Endocrine. 2017	28921414		1	1		-	-	2	-		PubMed	1	0
Effects on the incidence of cardiovascular events of the addition of pioglitazone versus sulfonylureas in patients with type 2 diabetes inadequately controlled with metformin (TOSCA.IT): a randomised, multicentre trial.	Lancet Diabetes Endocrinol. 2017	28917544		1	1		-	1	-	-		PubMed	1	0
Bladder cancer in the EMPA-REG OUTCOME trial.	Diabetologia. 2017	28913551		1	1		-	-	10	-		PubMed	1	0
Effects of Once-Weekly Exenatide on Cardiovascular Outcomes in Type 2 Diabetes.	N Engl J Med. 2017	28910237		1	1		-	1	-	-		PubMed	1	0
Empagliflozin and Clinical Outcomes in Patients with Type 2 Diabetes, Established Cardiovascular Disease and Chronic Kidney Disease.	Circulation. 2017	28904068		1	1		-	1	-	-		PubMed	1	0
Implementing Low-Cost, Community-Based Exercise Programs for Middle-Aged and Older Patients with Type 2 Diabetes: What Are the Benefits for Glycemic Control and Cardiovascular Risk?	Int J Environ Res Public Health. 2017	28902144		1	1		-	-	4	-		PubMed	1	0
Network meta-analysis of lorcaserin and oral hypoglycaemics for patients with type 2 diabetes mellitus and obesity.	Clin Obes. 2017	28891142		1	1		-	-	3	-		PubMed	1	0
The effects of yoga among adults with type 2 diabetes: A systematic review and meta-analysis.	Prev Med. 2017	28882745		1	1		-	-	4	-		PubMed	1	0
Pooled analysis of Phase III trials indicate contrasting influences of renal function on bloodÂ pressure, body weight, and HbA1c reductions with empagliflozin.	Kidney Int. 2017	28860019		1	1		-	-	10	-		PubMed	1	0
Metformin extended-release versus immediate-release: An international, randomized, double-blind, head-to-head trial in pharmacotherapy-naÃ¯ve patients with type 2 diabetes.	Diabetes Obes Metab. 2017	28857388		1	1		-	-	13	-		PubMed	1	0
Liraglutide and Renal Outcomes in Type 2 Diabetes.	N Engl J Med. 2017	28854085		1	1		-	3	-	-		PubMed	1	0
Laparoscopic sleeve gastrectomy for diabetics - 5-year outcomes.	Surg Obes Relat Dis. 2017	28843985		1	1		-	-	5	-		PubMed	1	0
Chronic Kidney Disease, Basal Insulin Glargine, and Health Outcomes in People with Dysglycemia: The ORIGIN Study.	Am J Med. 2017	28842165		1	1		-	4	-	-		PubMed	1	0
Gastrointestinal Adverse Events of Dipeptidyl Peptidase 4 Inhibitors in Type 2 Diabetes: A Systematic Review and Network Meta-analysis.	Clin Ther. 2017	28827024		1	1		-	-	9	-		PubMed	1	0
Effect of once-weekly dulaglutide on glycated haemoglobin (HbA1c) and fasting blood glucose in patient subpopulations by gender, duration of diabetes and baseline HbA1c.	Diabetes Obes Metab. 2017	28817231		1	1		-	-	8	-		PubMed	1	0
The Long-Term Effects of Bariatric Surgery on Type 2 Diabetes Remission, Microvascular and Macrovascular Complications, and Mortality: a Systematic Review and Meta-Analysis.	Obes Surg. 2017	28801703		1	1		-	-	5	-		PubMed	1	0
Roux-En-Y Gastric Bypass in Type 2 Diabetes Patients with Mild Obesity: a Systematic Review and Meta-analysis.	Obes Surg. 2017	28785975		1	1		-	-	5	-		PubMed	1	0
Risk Factors for Nocturnal Hypoglycemia in Insulin-treated Patients With Type 2 Diabetes: A Secondary Analysis of Observational Data Derived From an Integrated Clinical Trial Database.	Clin Ther. 2017	28781218		1	1		1	-	-	-		PubMed	1	0
Improving risk factor management for patients with poorly controlled type 2 diabetes: a systematic review of healthcare interventions in primary care and community settings.	BMJ Open. 2017	28780542		1	1		-	-	-	13		PubMed	1	0
Cost Effectiveness of Support for People Starting a New Medication for a Long-Term Condition Through Community Pharmacies: An Economic Evaluation of the New Medicine Service (NMS) Compared with Normal Practice.	Pharmacoeconomics. 2017	28776320		1	1		-	-	-	27		PubMed	1	0
Impact of metformin on cardiovascular disease: a meta-analysis of randomised trials among people with type 2 diabetes.	Diabetologia. 2017	28770324		1	1		-	-	13	-		PubMed	1	0
Clinical inertia and its impact on treatment intensification in people with type 2 diabetes mellitus.	Diabetes Metab. 2017	28754263		-	1		-	-	-	18		Exp Op	1	0
Fracture risk associated with common medications used in treating type 2 diabetes mellitus.	Am J Health Syst Pharm. 2017	28743778		1	1		-	12	-	-		PubMed	1	0
An Evaluation of the Clinical Therapeutic Effect of Lixisenatide in Type 2 Diabetes Patients: A Systematic Literature Review.	Curr Diabetes Rev. 2017	28738763		1	1		-	-	8	-		PubMed	1	0
Vitamin D supplementation and glycemic control in type 2 diabetes patients: A systematic review and meta-analysis.	Metabolism. 2017	28732572		1	1		-	-	1	-		PubMed	1	0
SGLT2 inhibitors and risk of cancer in type 2 diabetes: a systematic review and meta-analysis of randomised controlled trials.	Diabetologia. 2017	28725912		1	1		-	-	10	-		PubMed	1	0
Overcoming clinical inertia in insulin initiation in primary care for patients with type 2 diabetes: 24-month follow-up of the Stepping Up cluster randomised controlled trial.	Prim Care Diabetes. 2017	28705697		1	1		-	-	-	18		PubMed	1	0
Effects of Structured Versus Unstructured Self-Monitoring of Blood Glucose on Glucose Control in Patients With Non-insulin-treated Type 2 Diabetes: A Meta-Analysis of Randomized Controlled Trials.	J Diabetes Sci Technol. 2017	28697625		1	1		-	-	-	11		PubMed	1	0
Shared decision-making and outcomes in type 2 diabetes: A systematic review and meta-analysis.	Patient Educ Couns. 2017	28693922		1	1		-	-	-	13		PubMed	1	0
Meta-analysis and critical review on the efficacy and safety of alpha-glucosidase inhibitors in Asian and non-Asian populations.	J Diabetes Investig. 2017	28685995		1	1		-	-	11	-		PubMed	1	0
Efficacy and tolerability of the new autoinjected suspension of exenatide once weekly versus exenatide twice daily in patients with type 2 diabetes.	Diabetes Obes Metab. 2018	28685973		1	1		-	-	8	-		PubMed	1	0
Three-year data from 5 HARMONY phase 3 clinical trials of albiglutide in type 2 diabetes mellitus: Long-term efficacy with or without rescue therapy.	Diabetes Res Clin Pract. 2017	28683300		1	1		-	-	8	-		PubMed	1	0
Long-term efficacy and safety of sodium-glucose cotransporter-2 inhibitors as add-on to metformin treatment in the management of type 2 diabetes mellitus: A meta-analysis.	Medicine (Baltimore). 2017	28682870		1	1		-	-	10	-		PubMed	1	0
Glycaemic outcomes of an Individualized treatMent aPproach for oldER vulnerable patIents: A randomized, controlled stUdy in type 2 diabetes Mellitus (IMPERIUM).	Diabetes Obes Metab. 2018	28671753		1	1		-	5	-	-		PubMed	1	0
Efficacy and safety of sodium-glucose cotransporter-2 inhibitors versus dipeptidyl peptidase-4 inhibitors as monotherapy or add-on to metformin in patients with type 2 diabetes mellitus: A systematic review and meta-analysis.	Diabetes Obes Metab. 2018	28656707		1	1		-	-	-	16		PubMed	1	0
Safety and Tolerability of Empagliflozin in Patients with Type 2 Diabetes: Pooled Analysis of Phase I-III Clinical Trials.	Adv Ther. 2017	28631216		1	1		-	-	10	-		PubMed	1	0
Glycaemic control and hypoglycaemia with insulin glargine 300U/mL versus insulin glargine 100U/mL in insulin-naÃ¯ve people with type 2Â diabetes: 12-month results from the EDITION 3 trial.	Diabetes Metab. 2017	28622950		1	1		-	-	7	-		PubMed	1	0
Canagliflozin and Cardiovascular and Renal Events in Type 2 Diabetes.	N Engl J Med. 2017	28605608		1	1		-	1	-	-		PubMed	1	0
Efficacy and Safety of Degludec versus Glargine in Type 2 Diabetes.	N Engl J Med. 2017	28605603		1	1		-	-	7	-		PubMed	1	0
Glucose Self-monitoring in Non-Insulin-Treated Patients With Type 2 Diabetes in Primary Care Settings: A Randomized Trial.	JAMA Intern Med. 2017	28600913		1	1		-	-	-	11		PubMed	1	0
Incretin based treatments and mortality in patients with type 2 diabetes: systematic review and meta-analysis.	BMJ. 2017	28596247		1	1		-	2	-	-		PubMed	1	0
Metformin combined with acarbose vs. single medicine in the treatment of type 2 diabetes: A meta-analysis.	Exp Ther Med. 2017	28588669		1	1		-	-	11	-		PubMed	1	0
Once weekly glucagon-like peptide-1 receptor agonist albiglutide vs. prandial insulin added to basal insulin in patients with type 2 diabetes mellitus: Results over 52 weeks.	J Diabetes Complications. 2017	28587789		1	1		-	-	-	6		PubMed	1	0
Design and baseline characteristics of participants in the Researching cardiovascular Events with a Weekly INcretin in Diabetes (REWIND) trial on the cardiovascular effects of dulaglutide.	Diabetes Obes Metab. 2018	28573765		1	1		-	1	-	-		PubMed	1	0
Glucagon-like peptide-1 receptor agonists and atrial fibrillation: a systematic review and meta-analysis of randomised controlled trials.	J Endocrinol Invest. 2017	28569363		1	1		-	2	-	-		PubMed	1	0
Safety and efficiency of SGLT2 inhibitor combining with insulin in subjects with diabetes: Systematic review and meta-analysis of randomized controlled trials.	Medicine (Baltimore). 2017	28538386		1	1		-	-	-	7		PubMed	1	0
Lower Risk of Heart Failure and Death in Patients Initiated on Sodium-Glucose Cotransporter-2 Inhibitors Versus Other Glucose-Lowering Drugs: The CVD-REAL Study (Comparative Effectiveness of Cardiovascular Outcomes in New Users of Sodium-Glucose Cotransporter-2 Inhibitors).	Circulation. 2017	28522450		1	1		-	6	-	-		PubMed	1	0
Vildagliptin has the same safety profile as a sulfonylurea on bone metabolism and bone mineral density in post-menopausal women with type 2 diabetes: a randomized controlled trial.	Diabetol Metab Syndr. 2017	28515791		1	1		-	-	-	9		PubMed	1	0
Effects of glucagon-like peptide-1 receptor agonists on mortality and cardiovascular events: A comprehensive meta-analysis of randomized controlled trials.	Int J Cardiol. 2017	28501352		1	1		-	2	-	-		PubMed	1	0
Faster Aspart Versus Insulin Aspart as Part of a Basal-Bolus Regimen in Inadequately Controlled Type 2 Diabetes: The onset 2 Trial.	Diabetes Care. 2017	28483786		1	1		-	-	-	1		PubMed	1	0
The effect of vitamin D supplementation on glucose metabolism in type 2 diabetes mellitus: A systematic review and meta-analysis of intervention studies.	J Diabetes Complications. 2017	28483335		1	1		-	-	1	-		PubMed	1	0
Effects of age, gender, and body mass index on efficacy and hypoglycaemia outcomes across treat-to-target trials with insulin glargine 100â€‰U/mL added to oral antidiabetes agents in type 2 diabetes.	Diabetes Obes Metab. 2017	28449412		1	1		-	-	7	-		PubMed	1	0
Efficacy and safety of lixisenatide in patients with type 2 diabetes and renal impairment.	Diabetes Obes Metab. 2017	28449324		1	1		-	4	-	-		PubMed	1	0
Sodium-glucose cotransporter 2 (SGLT2) inhibitors and fracture risk in patients with type 2 diabetes mellitus: A meta-analysis.	Diabetes Metab Res Rev. 2017	28440590		1	1		-	-	10	-		PubMed	1	0
Comparative effectiveness of glycemic control in patients with type 2 diabetes treated with GLP-1 receptor agonists: a network meta-analysis of placebo-controlled and active-comparator trials.	Diabetes Metab Syndr Obes. 2017	28435304		1	1		-	-	8	-		PubMed	1	0
Impact of baseline glycated haemoglobin, diabetes duration and body mass index on clinical outcomes in the LixiLan-O trial testing a titratable fixed-ratio combination of insulin glargine/lixisenatide (iGlarLixi) vs insulin glargine and lixisenatide monocomponents.	Diabetes Obes Metab. 2017	28432746		-	1		-	-	-	2		Exp Op	1	0
Safety of sitagliptin in patients with type 2 diabetes and chronic kidney disease: outcomes from TECOS.	Diabetes Obes Metab. 2017	28432745		1	1		-	3	-	-		PubMed	1	0
Glycemic Control During Continuous Subcutaneous Insulin Infusion Versus Multiple Daily Insulin Injections in Type 2 Diabetes: Individual Patient Data Meta-analysis and Meta-regression of Randomized Controlled Trials.	Diabetes Care. 2017	28428322		1	1		-	-	-	1		PubMed	1	0
Decision aids for people facing health treatment or screening decisions.	Cochrane Database Syst Rev. 2017	28402085		-	1		-	-	-	19		Exp Op	1	0
Fixed ratio combinations of glucagon like peptide 1 receptor agonists with basal insulin: a systematic review and meta-analysis.	Endocrine. 2017	28401444		1	1		-	-	-	2		PubMed	1	0
Empagliflozin and Cerebrovascular Events in Patients With Type 2 Diabetes Mellitus at High Cardiovascular Risk.	Stroke. 2017	28386035		1	1		-	1	-	-		PubMed	1	0
Efficacy and safety of once-weekly semaglutide versus once-daily sitagliptin as an add-on to metformin, thiazolidinediones, or both, in patients with type 2 diabetes (SUSTAIN 2): a 56-week, double-blind, phase 3a, randomised trial.	Lancet Diabetes Endocrinol. 2017	28385659		1	1		-	-	-	5		PubMed	1	0
Resistance Training for Glycemic Control, Muscular Strength, and Lean Body Mass in Old Type 2 Diabetic Patients: A Meta-Analysis.	Diabetes Ther. 2017	28382531		1	1		-	-	4	-		PubMed	1	0
Effects of intensive glucose control on microvascular outcomes in patients with type 2 diabetes: a meta-analysis of individual participant data from randomised controlled trials.	Lancet Diabetes Endocrinol. 2017	28365411		1	1		1	-	-	-		PubMed	1	0
Efficacy and safety of once-weekly semaglutide versus once-daily insulin glargine as add-on to metformin (with or without sulfonylureas) in insulin-naive patients with type 2 diabetes (SUSTAIN 4): a randomised, open-label, parallel-group, multicentre, multinational, phase 3a trial.	Lancet Diabetes Endocrinol. 2017	28344112		1	1		-	-	-	6		PubMed	1	0
Randomized trial comparing the effects of gliclazide, liraglutide, and metformin on diabetes with non-alcoholic fatty liver disease.	J Diabetes. 2017	28332301		1	1		-	10	-	-		PubMed	1	0
Efficacy and safety of canagliflozin in patients with type 2 diabetes based on history of cardiovascular disease or cardiovascular risk factors: a post hoc analysis of pooled data.	Cardiovasc Diabetol. 2017	28327140		1	1		-	2	-	-		PubMed	1	0
Insulin and Glucagon-Like Peptide 1 Receptor Agonist Combination Therapy in Type 2 Diabetes: A Systematic Review and Meta-analysis of Randomized Controlled Trials.	Diabetes Care. 2017	28325801		1	1		-	-	-	3		PubMed	1	0
Sodium-Glucose Co-transporter 2 (SGLT2) Inhibitor: Comparing Trial Data and Real-World Use.	Diabetes Ther. 2017	28324484		1	1		-	-	10	-		PubMed	1	0
Systematic review and meta-analysis of dietary carbohydrate restriction in patients with type 2 diabetes.	BMJ Open Diabetes Res Care. 2017	28316796		1	1		-	-	2	-		PubMed	1	0
Safety and efficacy of a glucagon-like peptide-1 receptor agonist added to basal insulin therapy versus basal insulin with or without a rapid-acting insulin in patients with type 2 diabetes: results of a meta-analysis.	Postgrad Med. 2017	28294702		1	1		-	-	-	3		PubMed	1	0
Placebo-controlled, randomized trial of the addition of once-weekly glucagon-like peptide-1 receptor agonist dulaglutide to titrated daily insulin glargine in patients with type 2 diabetes (AWARD-9).	Diabetes Obes Metab. 2017	28294499		1	1		-	-	-	3		PubMed	1	0
Mobile App-Based Interventions to Support Diabetes Self-Management: A Systematic Review of Randomized Controlled Trials to Identify Functions Associated with Glycemic Efficacy.	JMIR Mhealth Uhealth. 2017	28292740		1	1		-	-	-	12		PubMed	1	0
Supporting insulin initiation in type 2 diabetes in primary care: results of the Stepping Up pragmatic cluster randomised controlled clinical trial.	BMJ. 2017	28274941		1	1		-	-	-	18		PubMed	1	0
Effects of dipeptidyl peptidase-4 inhibitors in type 2 diabetes patients with moderate to severe chronic kidney disease: Meta-analysis of randomized controlled trials using unadjusted data.	J Diabetes. 2017	28266136		1	1		-	4	-	-		PubMed	1	0
Individualizing treatment targets for elderly patients with type 2 diabetes: factors influencing clinical decision making in the 24-week, randomized INTERVAL study.	Aging (Albany NY). 2017	28260692		1	1		4	4	-	-		PubMed	2	0
Safety issues with glucagon-like peptide-1 receptor agonists (pancreatitis, pancreatic cancer and cholelithiasis): Data from randomized controlled trials.	Diabetes Obes Metab. 2017	28244632		1	1		-	-	8	-		PubMed	1	0
Sodium-glucose co-transporter-2 inhibitors and risk of adverse renal outcomes among patients with type 2 diabetes: A network and cumulative meta-analysis of randomized controlled trials.	Diabetes Obes Metab. 2017	28240446		1	1		-	3	-	-		PubMed	1	0
Effectiveness of group-based self-management education for individuals with Type 2 diabetes: a systematic review with meta-analyses and meta-regression.	Diabet Med. 2017	28226200		1	1		-	-	-	19		PubMed	1	0
Five-Year Outcomes of a Randomized Trial of Gastric Band Surgery in Overweight but Not Obese People With Type 2 Diabetes.	Diabetes Care. 2017	28216478		1	1		-	-	5	-		PubMed	1	0
Efficacy and safety of autoinjected exenatide once-weekly suspension versus sitagliptin or placebo with metformin in patients with type 2 diabetes: The DURATION-NEO-2 randomized clinical study.	Diabetes Obes Metab. 2017	28205322		1	1		-	-	-	5		PubMed	1	0
Bariatric Surgery versus Intensive Medical Therapy for Diabetes - 5-Year Outcomes.	N Engl J Med. 2017	28199805		1	1		-	-	5	-		PubMed	1	0
Lixisenatide Therapy in Older Patients With Type 2 Diabetes Inadequately Controlled on Their Current Antidiabetic Treatment: The GetGoal-O Randomized Trial.	Diabetes Care. 2017	28188240		1	1		-	5	-	-		PubMed	1	0
Efficacy and Safety of Vildagliptin as an Add-On Therapy in Inadequately Controlled Type 2 Diabetes Patients Treated With Basal Insulin.	J Clin Med Res. 2017	28179966		1	1		-	-	-	14		PubMed	1	0
Efficacy and safety of once-weekly semaglutide monotherapy versus placebo in patients with type 2 diabetes (SUSTAIN 1): a double-blind, randomised, placebo-controlled, parallel-group, multinational, multicentre phase 3a trial.	Lancet Diabetes Endocrinol. 2017	28110911		1	1		-	-	8	-		PubMed	1	0
Glucagon-like peptide-1 receptor agonists and risk of acute pancreatitis in patients with type 2 diabetes.	Diabetes Obes Metab. 2017	28105738		1	1		-	-	8	-		PubMed	1	0
Combination Therapy With Exenatide Plus Pioglitazone Versus Basal/Bolus Insulin in Patients With Poorly Controlled Type 2 Diabetes on Sulfonylurea Plus Metformin: The Qatar Study.	Diabetes Care. 2017	28096223		1	1		-	-	-	15		PubMed	1	0
Patient-level meta-analysis of efficacy and hypoglycaemia in people with type 2 diabetes initiating insulin glargine 100U/mL or neutral protamine Hagedorn insulin analysed according to concomitant oral antidiabetes therapy.	Diabetes Res Clin Pract. 2017	28092788		1	1		-	-	7	-		PubMed	1	0
Physician step prescription and monitoring to improve ARTERial health (SMARTER): A randomized controlled trial in patients with type 2 diabetes and hypertension.	Diabetes Obes Metab. 2017	28074635		1	1		-	-	4	-		PubMed	1	0
Exploring the characteristics of suboptimally controlled patients after 24weeks of basal insulin treatment: An individualized approach to intensification.	Diabetes Res Clin Pract. 2017	28061430		1	1		-	-	7	-		PubMed	1	0
Relationship of glycated haemoglobin and reported hypoglycaemia to cardiovascular outcomes in patients with type 2 diabetes and recent acute coronary syndrome events: The EXAMINE trial.	Diabetes Obes Metab. 2017	28058763		1	1		-	1	-	-		PubMed	1	0
Assessing the Safety of Sitagliptin in Older Participants in the Trial Evaluating Cardiovascular Outcomes with Sitagliptin (TECOS).	Diabetes Care. 2017	28057693		1	1		-	1	-	-		PubMed	1	0
Cardiovascular safety of incretin-based therapy for type 2 diabetes: A meta-analysis of randomized trials.	Int J Cardiol. 2017	28043676		1	1		-	2	-	-		PubMed	1	0
A randomized clinical trial of the safety and efficacy of sitagliptin in patients with type 2 diabetes mellitus inadequately controlled by acarbose alone.	Curr Med Res Opin. 2017	28035868		1	1		-	-	-	23		PubMed	1	0
Exenatide Add-on to Continuous Subcutaneous Insulin Infusion Therapy Reduces Bolus Insulin Doses in Patients with Type 2 Diabetes: A Randomized, Controlled, Open-Label Trial.	Diabetes Ther. 2017	27995593		1	1		-	-	-	3		PubMed	1	0
Efficacy and safety of glucagon-like peptide-1 receptor agonists in type 2 diabetes: A systematic review and mixed-treatment comparison analysis.	Diabetes Obes Metab. 2017	27981757		1	1		-	-	8	-		PubMed	1	0
Effect of race and ethnicity on vildagliptin efficacy: A pooled analysis of phase II and III studies.	Diabetes Obes Metab. 2017	27943546		1	1		-	-	9	-		PubMed	1	0
The Efficacy of IDegLira (Insulin Degludec/Liraglutide Combination) in Adults with Type 2 Diabetes Inadequately Controlled with a GLP-1 Receptor Agonist and Oral Therapy: DUAL III Randomized Clinical Trial.	Diabetes Ther. 2017	27943107		1	1		-	-	-	2		PubMed	1	0
Baseline Body Mass Index and the Efficacy of Hypoglycemic Treatment in Type 2 Diabetes: A Meta-Analysis.	PLoS One. 2016	27935975		1	1		-	8	-	-		PubMed	1	0
Do Mobile Phone Applications Improve Glycemic Control (HbA1c) in the Self-management of Diabetes? A Systematic Review, Meta-analysis, and GRADE of 14 Randomized Trials.	Diabetes Care. 2016	27926892		1	1		-	-	-	12		PubMed	1	0
Empagliflozin as Add-on Therapy in Patients With Type 2 Diabetes Inadequately Controlled With Linagliptin and Metformin: A 24-Week Randomized, Double-Blind, Parallel-Group Trial.	Diabetes Care. 2017	27913576		1	1		-	-	-	4		PubMed	1	0
Impact of Information Technology-Based Interventions for Type 2 Diabetes Mellitus on Glycemic Control: A Systematic Review and Meta-Analysis.	J Med Internet Res. 2016	27888169		1	1		-	-	-	12		PubMed	1	0
Cardiovascular Safety of Dipeptidyl-Peptidase IV Inhibitors: A Meta-Analysis of Placebo-Controlled Randomized Trials.	Am J Cardiovasc Drugs. 2017	27873238		1	1		-	2	-	-		PubMed	1	0
Urinary tract and genital infections in patients with type 2 diabetes treated with sodium-glucose co-transporter 2 inhibitors: A meta-analysis of randomized controlled trials.	Diabetes Obes Metab. 2017	27862830		1	1		-	-	10	-		PubMed	1	0
T2DM Self-Management via Smartphone Applications: A Systematic Review and Meta-Analysis.	PLoS One. 2016	27861583		1	1		-	-	-	12		PubMed	1	0
Diabetes self-management education reduces risk of all-cause mortality in type 2 diabetes patients: a systematic review and meta-analysis.	Endocrine. 2017	27837440		1	1		-	-	-	19		PubMed	1	0
Benefits and Harms of Sodium-Glucose Co-Transporter 2 Inhibitors in Patients with Type 2 Diabetes: A Systematic Review and Meta-Analysis.	PLoS One. 2016	27835680		1	1		-	-	10	-		PubMed	1	0
Randomized controlled trial of a nationally available weight control program tailored for adults with type 2 diabetes.	Obesity (Silver Spring). 2016	27804264		1	1		-	-	2	-		PubMed	1	0
Effect of telemedicine on glycated hemoglobin in diabetes: a systematic review and meta-analysis of randomized trials.	CMAJ. 2017	27799615		-	1		-	-	-	12		Exp Op	1	0
Effect of Saxagliptin on Renal Outcomes in the SAVOR-TIMI 53 Trial.	Diabetes Care. 2017	27797925		1	1		-	3	-	-		PubMed	1	0
What Is Shared Decision Making? (and What It Is Not).	Acad Emerg Med. 2016	27770514		-	1		-	-	-	19		Exp Op	1	0
Beneficial effect of lixisenatide after 76 weeks of treatment in patients with type 2 diabetes mellitus: A meta-analysis from the GetGoal programme.	Diabetes Obes Metab. 2017	27762096		1	1		-	-	8	-		PubMed	1	0
Linagliptin as add-on to empagliflozin and metformin in patients with type 2 diabetes: Two 24-week randomized, double-blind, double-dummy, parallel-group trials.	Diabetes Obes Metab. 2017	27762093		1	1		-	-	-	4		PubMed	1	0
Efficacy and Safety of Once-Daily Insulin Degludec/Insulin Aspart versus Insulin Glargine (U100) for 52 Weeks in Insulin-NaÃ¯ve Patients with Type 2 Diabetes: A Randomized Controlled Trial.	PLoS One. 2016	27760129		1	1		-	-	7	-		PubMed	1	0
Efficacy and safety of DPP-4 inhibitors in patients with type 2 diabetes: Meta-analysis of placebo-controlled randomized clinical trials.	Diabetes Metab. 2017	27745828		1	1		-	-	9	-		PubMed	1	0
Effect of Sitagliptin on Kidney Function and Respective Cardiovascular Outcomes in Type 2 Diabetes: Outcomes From TECOS.	Diabetes Care. 2016	27742728		1	1		-	3	-	-		PubMed	1	0
A meta-analysis comparing clinical effects of short- or long-acting GLP-1 receptor agonists versus insulin treatment from head-to-head studies in type 2 diabetic patients.	Diabetes Obes Metab. 2017	27717195		1	1		-	-	-	6		PubMed	1	0
Glucagon-like peptide-1 receptor agonists compared with basal insulins for the treatment of type 2 diabetes mellitus: a systematic review and meta-analysis.	Diabetes Obes Metab. 2017	27717130		1	1		-	-	-	6		PubMed	1	0
Addition of a dipeptidyl peptidase-4 inhibitor, sitagliptin, to ongoing therapy with the glucagon-like peptide-1 receptor agonist liraglutide: A randomized controlled trial in patients with type 2 diabetes.	Diabetes Obes Metab. 2017	27709794		1	1		-	-	-	24		PubMed	1	0
Medication adherence in patients with diabetes mellitus: does physician drug dispensing enhance quality of care? Evidence from a large health claims database in Switzerland.	Patient Prefer Adherence. 2016	27695299		-	1		-	-	-	27		Exp Op	1	0
Theory-based self-management educational interventions on patients with type 2 diabetes: a systematic review and meta-analysis of randomized controlled trials.	J Adv Nurs. 2017	27681948		1	1		-	-	-	19		PubMed	1	0
The effect of yoga practice on glycemic control and other health parameters in Type 2 diabetes mellitus patients: A systematic review and meta-analysis.	Complement Ther Med. 2016	27670871		1	1		-	-	4	-		PubMed	1	0
Meta-Analysis of Effects of Sodium-Glucose Cotransporter 2 Inhibitors on Cardiovascular Outcomes and All-Cause Mortality Among Patients With Type 2 Diabetes Mellitus.	Am J Cardiol. 2016	27666177		1	1		-	2	-	-		PubMed	1	0
Exenatide once weekly plus dapagliflozin once daily versus exenatide or dapagliflozin alone in patients with type 2 diabetes inadequately controlled with metformin monotherapy (DURATION-8): a 28 week, multicentre, double-blind, phase 3, randomised controlled trial.	Lancet Diabetes Endocrinol. 2016	27651331		1	1		-	-	-	22		PubMed	1	0
Efficacy and Safety of LixiLan, a Titratable Fixed-Ratio Combination of Insulin Glargine Plus Lixisenatide in Type 2 Diabetes Inadequately Controlled on Basal Insulin and Metformin: The LixiLan-L Randomized Trial.	Diabetes Care. 2016	27650977		-	1		-	-	-	2		Exp Op	1	0
Semaglutide and Cardiovascular Outcomes in Patients with Type 2 Diabetes.	N Engl J Med. 2016	27633186		1	1		-	1	-	-		PubMed	1	0
Meta-analysis of bariatric surgery versus non-surgical treatment for type 2 diabetes mellitus.	Oncotarget. 2016	27626180		1	1		-	-	5	-		PubMed	1	0
The efficacy and safety of liraglutide added to metformin in patients with diabetes: a meta-analysis of randomized controlled trials.	Sci Rep. 2016	27600499		1	1		-	-	8	-		PubMed	1	0
Sodium-glucose co-transporter 2 inhibitors in addition to insulin therapy for management of type 2 diabetes mellitus: A meta-analysis of randomized controlled trials.	Diabetes Obes Metab. 2017	27598833		1	1		-	-	-	7		PubMed	1	0
Is self-monitoring of blood glucose effective in improving glycaemic control in type 2 diabetes without insulin treatment: a meta-analysis of randomised controlled trials.	BMJ Open. 2016	27591016		1	1		-	-	-	11		PubMed	1	0
Safety and efficacy of insulin degludec/liraglutide (IDegLira) added to sulphonylurea alone or to sulphonylurea and metformin in insulin-naÃ¯ve people with Type 2 diabetes: the DUAL IV trial.	Diabet Med. 2017	27589252		1	1		-	-	-	2		PubMed	1	0
Estimation of individual beneficial and adverse effects of intensive glucose control for patients with type 2 diabetes.	Diabetologia. 2016	27586250		1	1		1	-	-	-		PubMed	1	0
Efficacy and safety of empagliflozin in combination with other oral hypoglycemic agents in patients with type 2 diabetes mellitus.	Endocrinol Nutr. 2016	27578024		1	1		-	-	10	-		PubMed	1	0
Efficacy and Tolerability of Exenatide Once Weekly Over 6 Years in Patients with Type 2 Diabetes: An Uncontrolled Open-Label Extension of the DURATION-1 Study.	Diabetes Technol Ther. 2016	27525540		1	1		-	-	8	-		PubMed	1	0
Poor medication adherence in type 2 diabetes: recognizing the scope of the problem and its key contributors.	Patient Prefer Adherence. 2016	27524885		-	1		-	-	-	27		Exp Op	1	0
Empagliflozin in combination with oral agents in young and overweight/obese Type 2 diabetes mellitus patients: A pooled analysis of three randomized trials.	J Diabetes Complications. 2016	27499456		1	1		-	7	-	-		PubMed	1	0
Initial Combination of Empagliflozin and Metformin in Patients With Type 2 Diabetes.	Diabetes Care. 2016	27493136		1	1		-	-	14	-		PubMed	1	0
Effects of SGLT-2 inhibitors on mortality and cardiovascular events: a comprehensive meta-analysis of randomized controlled trials.	Acta Diabetol. 2017	27488726		1	1		-	2	-	-		PubMed	1	0
Efficacy and safety of linagliptin according to patient baseline characteristics: A pooled analysis of three phase 3 trials.	Nutr Metab Cardiovasc Dis. 2016	27484756		1	1		-	-	9	-		PubMed	1	0
MANAGEMENT OF ENDOCRINE DISEASE: The effect of vitamin D supplementation on glycaemic control in patients with type 2 diabetes mellitus: a systematic review and meta-analysis.	Eur J Endocrinol. 2017	27484453		1	1		-	-	1	-		PubMed	1	0
The effect of periodontal therapy on glycemic control and fasting plasma glucose level in type 2 diabetic patients: systematic review and meta-analysis.	BMC Oral Health. 2016	27473177		1	1		-	-	-	26		PubMed	1	0
Comparison of Clinical Outcomes and Adverse Events Associated With Glucose-Lowering Drugs in Patients With Type 2 Diabetes: A Meta-analysis.	JAMA. 2016	27434443		1	1		-	2	-	-		PubMed	1	0
One-year efficacy and safety of saxagliptin add-on in patients receiving dapagliflozin and metformin.	Diabetes Obes Metab. 2016	27403645		1	1		-	-	-	4		PubMed	1	0
Saxagliptin Efficacy and Safety in Patients With Type 2 Diabetes and Moderate Renal Impairment.	Diabetes Ther. 2016	27402391		1	1		-	4	-	-		PubMed	1	0
Safety and efficacy of linagliptin in patients with type 2 diabetes mellitus and coronary artery disease: Analysis of pooled events from 19 clinical trials.	J Diabetes Complications. 2016	27396241		1	1		-	2	-	-		PubMed	1	0
Efficacy and safety of insulin in type 2 diabetes: meta-analysis of randomised controlled trials.	BMC Endocr Disord. 2016	27391319		1	1		-	-	7	-		PubMed	1	0
Efficacy and safety of triple therapy with dapagliflozin add-on to saxagliptin plus metformin over 52â€‰weeks in patients with type 2 diabetes.	Diabetes Obes Metab. 2016	27385192		1	1		-	-	-	4		PubMed	1	0
Efficacy and safety of switching from sitagliptin to liraglutide in subjects with type 2 diabetes (LIRA-SWITCH): a randomized, double-blind, double-dummy, active-controlled 26-week trial.	Diabetes Obes Metab. 2016	27381275		1	1		-	-	-	5		PubMed	1	0
Cardiovascular safety of empagliflozin in patients with type 2 diabetes: a meta-analysis of data from randomized placebo-controlled trials.	Diabetes Obes Metab. 2016	27376831		1	1		-	2	-	-		PubMed	1	0
Nurse-led patient-centered self-management support improves HbA1c in patients with type 2 diabetes-A randomized study.	Patient Educ Couns. 2016	27372525		1	1		-	-	-	19		PubMed	1	0
Sulphonylurea compared to DPP-4 inhibitors in combination with metformin carries increased risk of severe hypoglycemia, cardiovascular events, and all-cause mortality.	Diabetes Res Clin Pract. 2016	27329021		1	1		-	-	-	9		PubMed	1	0
Efficacy and safety of saxagliptin, a dipeptidyl peptidase-4 inhibitor, in hemodialysis patients with diabetic nephropathy: A randomized open-label prospective trial.	Diabetes Res Clin Pract. 2016	27321342		1	1		-	4	-	-		PubMed	1	0
Meta-analysis of dipeptidyl peptidase-4 inhibitors use and cardiovascular risk in patients with type 2 diabetes mellitus.	Diabetes Res Clin Pract. 2016	27321333		1	1		-	2	-	-		PubMed	1	0
Triple therapy combinations for the treatment of type 2 diabetes - A network meta-analysis.	Diabetes Res Clin Pract. 2016	27321330		1	1		-	-	-	17		PubMed	1	0
Does telemedicine improve treatment outcomes for diabetes? A meta-analysis of results from 55 randomized controlled trials.	Diabetes Res Clin Pract. 2016	27321329		1	1		-	-	-	12		PubMed	1	0
Efficacy and safety of the addition of a dipeptidyl peptidase-4 inhibitor to insulin therapy in patients with type 2 diabetes: A systematic review and meta-analysis.	Diabetes Res Clin Pract. 2016	27321321		1	1		-	-	-	14		PubMed	1	0
The effect of sodium glucose cotransporter 2 inhibition with empagliflozin on microalbuminuria and macroalbuminuria in patients with type 2 diabetes.	Diabetologia. 2016	27316632		1	1		-	3	-	-		PubMed	1	0
Effect of Sodium-Glucose Cotransporter 2 Inhibitors on Diabetic Ketoacidosis Among Patients With Type 2 Diabetes: A Meta-analysis of Randomized Controlled Trials.	Diabetes Care. 2016	27311492		1	1		-	-	10	-		PubMed	1	0
Once-Daily Liraglutide Versus Lixisenatide as Add-on to Metformin in Type 2 Diabetes: A 26-Week Randomized Controlled Clinical Trial.	Diabetes Care. 2016	27311491		1	1		-	-	8	-		PubMed	1	0
Empagliflozin and Progression of Kidney Disease in Type 2 Diabetes.	N Engl J Med. 2016	27299675		1	1		-	3	-	-		PubMed	1	0
Liraglutide and Cardiovascular Outcomes in Type 2 Diabetes.	N Engl J Med. 2016	27295427		1	1		-	1	-	-		PubMed	1	0
Effect of Adding Liraglutide vs Placebo to a High-Dose lnsulin Regimen in Patients With Type 2 Diabetes: A Randomized Clinical Trial.	JAMA Intern Med. 2016	27273731		1	1		-	-	-	3		PubMed	1	0
Effects of intensive glucose lowering in treatment of type 2 diabetes mellitus on cardiovascular outcomes: A meta-analysis of data from 58,160 patients in 13 randomized controlled trials.	Int J Cardiol. 2016	27236108		1	1		1	-	-	-		PubMed	1	0
Bariatric/Metabolic Surgery to Treat Type 2 Diabetes in Patients With a BMI <35 kg/m2.	Diabetes Care. 2016	27222550		1	1		-	-	5	-		PubMed	1	0
The Long-Term Outcomes Of Bariatric Surgery On Patients With Type 2 Diabetes Mellitus: A Systematic Review And Meta-Analyses.	Value Health. 2014	27202676		1	1		-	-	5	-		PubMed	1	0
New Meta-Analysis of Patient-Level Data on Efficacy And Hypoglycaemia with Insulin Glargine or Nph Insulin in Type 2 Diabetes Mellitus (T2DM) According to Concomitant Oral Therapy.	Value Health. 2014	27200594		1	1		-	-	7	-		PubMed	1	0
Linagliptin and pioglitazone combination therapy versus monotherapy with linagliptin or pioglitazone: A randomised, double-blind, parallel-group, multinational clinical trial.	Diab Vasc Dis Res. 2016	27190087		1	1		-	-	16	-		PubMed	1	0
Glucagon-like peptide-1 receptor agonists and heart failure in type 2 diabetes: systematic review and meta-analysis of randomized and observational studies.	BMC Cardiovasc Disord. 2016	27169565		1	1		-	6	-	-		PubMed	1	0
Similar efficacy and safety of once-weekly dulaglutide in patients with type 2 diabetes aged â‰¥65 and <65 years.	Diabetes Obes Metab. 2016	27161178		1	1		-	5	-	-		PubMed	1	0
Efficacy and safety of titrated canagliflozin in patients with type 2 diabetes mellitus inadequately controlled on metformin and sitagliptin.	Diabetes Obes Metab. 2016	27160639		1	1		-	-	-	4		PubMed	1	0
Efficacy and Acceptability of Glycemic Control of Glucagon-Like Peptide-1 Receptor Agonists among Type 2 Diabetes: A Systematic Review and Network Meta-Analysis.	PLoS One. 2016	27158818		1	1		-	-	8	-		PubMed	1	0
Comparison between SGLT2 inhibitors and DPP4 inhibitors added to insulin therapy in type 2 diabetes: a systematic review with indirect comparison meta-analysis.	Diabetes Metab Res Rev. 2017	27155214		1	1		-	-	-	16		PubMed	1	0
Combination of Saxagliptin and Metformin Is Effective as Initial Therapy in New-Onset Type 2 Diabetes Mellitus With Severe Hyperglycemia.	J Clin Endocrinol Metab. 2016	27144930		1	1		-	-	10	-		PubMed	1	0
Addition of dipeptidyl peptidase-4 inhibitors to sulphonylureas and risk of hypoglycaemia: systematic review and meta-analysis.	BMJ. 2016	27142267		1	1		-	-	9	-		PubMed	1	0
Roux-en-Y Gastric Bypass Versus Medical Treatment for Type 2 Diabetes Mellitus in Obese Patients: A Systematic Review and Meta-Analysis of Randomized Controlled Trials.	Medicine (Baltimore). 2016	27124041		1	1		-	-	5	-		PubMed	1	0
Pharmacist Interventions in the Management of Type 2 Diabetes Mellitus: A Systematic Review of Randomized Controlled Trials.	J Manag Care Spec Pharm. 2016	27123912		1	1		-	-	-	13		PubMed	1	0
A Multinational, Randomized, Open-label, Treat-to-Target Trial Comparing Insulin Degludec and Insulin Glargine in Insulin-NaÃ¯ve Patients with Type 2 Diabetes Mellitus.	Drugs R D. 2016	27098525		1	1		-	-	7	-		PubMed	1	0
Diabetes Medications as Monotherapy or Metformin-Based Combination Therapy for Type 2 Diabetes: A Systematic Review and Meta-analysis.	Ann Intern Med. 2016	27088241		1	1		-	-	13	-		PubMed	1	0
The Association between Sulfonylurea Use and All-Cause and Cardiovascular Mortality: A Meta-Analysis with Trial Sequential Analysis of Randomized Clinical Trials.	PLoS Med. 2016	27071029		1	1		-	-	6	-		PubMed	1	0
Efficacy and safety of sodium-glucose co-transporter-2 inhibitors in type 2 diabetes mellitus: systematic review and network meta-analysis.	Diabetes Obes Metab. 2016	27059700		1	1		-	-	10	-		PubMed	1	0
Safety and efficacy of dipeptidyl peptidase-4 inhibitors vs sulfonylurea in metformin-based combination therapy for type 2 diabetes mellitus: Systematic review and meta-analysis.	Clin Invest Med. 2016	27040861		1	1		-	-	-	9		PubMed	1	0
Efficacy and safety of once-daily insulin degludec/insulin aspart compared with once-daily insulin glargine in participants with Type 2 diabetes: a randomized, treat-to-target study.	Diabet Med. 2017	27027878		1	1		-	-	-	1		PubMed	1	0
The diabetes nutrition education study randomized controlled trial: A comparative effectiveness study of approaches to nutrition in diabetes self-management education.	Patient Educ Couns. 2016	27026388		1	1		-	-	-	19		PubMed	1	0
Long-term Benefits of Intensive Glucose Control for Preventing End-Stage Kidney Disease: ADVANCE-ON.	Diabetes Care. 2016	27006512		1	1		-	3	-	-		PubMed	1	0
Efficacy and Safety of Canagliflozin in Individuals Aged 75 and Older with Type 2 Diabetes Mellitus: A Pooled Analysis.	J Am Geriatr Soc. 2016	27000327		1	1		-	5	-	-		PubMed	1	0
Effect of adding insulin degludec to treatment in patients with type 2 diabetes inadequately controlled with metformin and liraglutide: a double-blind randomized controlled trial (BEGIN: ADD TO GLP-1 Study).	Diabetes Obes Metab. 2016	26990378		1	1		-	-	-	3		PubMed	1	0
Simultaneous Reduction in Both HbA1c and Body Weight with Canagliflozin Versus Glimepiride in Patients with Type 2 Diabetes on Metformin.	Diabetes Ther. 2016	26984361		1	1		-	-	-	10		PubMed	1	0
Gastric bypass surgery vs intensive lifestyle and medical intervention for type 2 diabetes: the CROSSROADS randomised controlled trial.	Diabetologia. 2016	26983924		1	1		-	-	5	-		PubMed	1	0
Effect of Insulin Glargine Up-titration vs Insulin Degludec/Liraglutide on Glycated Hemoglobin Levels in Patients With Uncontrolled Type 2 Diabetes: The DUAL V Randomized Clinical Trial.	JAMA. 2016	26934259		1	1		-	-	-	3		PubMed	1	0
Pen Devices for Insulin Self-Administration Compared With Needle and Vial: Systematic Review of the Literature and Meta-Analysis.	J Diabetes Sci Technol. 2016	26920639		1	1		-	-	-	20		PubMed	1	0
Shared decision making in endocrinology: present and future directions.	Lancet Diabetes Endocrinol. 2016	26915314		-	1		-	-	-	19		Exp Op	1	0
Cardiovascular safety for once-weekly dulaglutide in type 2 diabetes: a pre-specified meta-analysis of prospectively adjudicated cardiovascular events.	Cardiovasc Diabetol. 2016	26912057		1	1		-	2	-	-		PubMed	1	0
SGLT-2 receptor inhibitors for treating patients with type 2 diabetes mellitus: a systematic review and network meta-analysis.	BMJ Open. 2016	26911584		1	1		-	-	10	-		PubMed	1	0
The effect of dapagliflozin on renal function in patients with type 2 diabetes.	J Nephrol. 2016	26894924		1	1		-	3	-	-		PubMed	1	0
Dipeptidyl peptidase-4 inhibitors and risk of heart failure in type 2 diabetes: systematic review and meta-analysis of randomised and observational studies.	BMJ. 2016	26888822		1	1		-	6	-	-		PubMed	1	0
A Network Meta-analysis Comparing Exenatide Once Weekly with Other GLP-1 Receptor Agonists for the Treatment of Type 2 Diabetes Mellitus.	Diabetes Ther. 2016	26886440		1	1		-	-	8	-		PubMed	1	0
Safety and efficacy of insulin glargine 300 u/mL compared with other basal insulin therapies in patients with type 2 diabetes mellitus: a network meta-analysis.	BMJ Open. 2016	26880669		1	1		-	-	7	-		PubMed	1	0
Optimizing diabetes control in people with Type 2 diabetes through nurse-led telecoaching.	Diabet Med. 2016	26872105		1	1		-	-	-	12		PubMed	1	0
Sustained efficacy of insulin pump therapy compared with multiple daily injections in type 2 diabetes: 12-month data from the OpT2mise randomized trial.	Diabetes Obes Metab. 2016	26854123		1	1		-	-	-	1		PubMed	1	0
Efficacy and safety of empagliflozin as add-on to metformin for type 2 diabetes: a systematic review and meta-analysis.	Eur J Clin Pharmacol. 2016	26832915		1	1		-	-	14	-		PubMed	1	0
Assessing the efficacy and safety of combined DPP-4 inhibitor and insulin treatment in patients with type 2 diabetes: a meta-analysis.	Int J Clin Exp Pathol. 2015	26823727		1	1		-	-	-	14		PubMed	1	0
The effectiveness of regular leisure-time physical activities on long-term glycemic control in people with type 2 diabetes: A systematic review and meta-analysis.	Diabetes Res Clin Pract. 2016	26822261		1	1		-	-	4	-		PubMed	1	0
Heart failure outcomes with empagliflozin in patients with type 2 diabetes at high cardiovascular risk: results of the EMPA-REG OUTCOMEÂ® trial.	Eur Heart J. 2016	26819227		1	1		-	6	-	-		PubMed	1	0
A 24-week study to evaluate the efficacy and safety of once-weekly dulaglutide added on to glimepiride in type 2 diabetes (AWARD-8).	Diabetes Obes Metab. 2016	26799540		1	1		-	-	8	-		PubMed	1	0
Initial Combination Therapy With Canagliflozin Plus Metformin Versus Each Component as Monotherapy for Drug-NaÃ¯ve Type 2 Diabetes.	Diabetes Care. 2016	26786577		1	1		-	-	14	-		PubMed	1	0
Efficacy and safety of dulaglutide in patients with type 2 diabetes: a meta-analysis and systematic review.	Sci Rep. 2016	26742577		1	1		-	-	8	-		PubMed	1	0
Systematic review and meta-analysis of vildagliptin for treatment of type 2 diabetes.	Endocrine. 2016	26714458		1	1		-	-	9	-		PubMed	1	0
Safety, tolerability and effects on cardiometabolic risk factors of empagliflozin monotherapy in drug-naÃ¯ve patients with type 2 diabetes: a double-blind extension of a Phase III randomized controlled trial.	Cardiovasc Diabetol. 2015	26701110		1	1		-	-	10	-		PubMed	1	0
Network meta-analysis of treatments for type 2 diabetes mellitus following failure with metformin plus sulfonylurea.	Curr Med Res Opin. 2016	26700585		1	1		-	-	-	8		PubMed	1	0
Efficacy and Safety of Liraglutide Versus Placebo as Add-on to Glucose-Lowering Therapy in Patients With Type 2 Diabetes and Moderate Renal Impairment (LIRA-RENAL): A Randomized Clinical Trial.	Diabetes Care. 2016	26681713		1	1		-	4	-	-		PubMed	1	0
Triple therapy in type 2 diabetes; a systematic review and network meta-analysis.	PeerJ. 2015	26664803		1	1		-	-	-	17		PubMed	1	0
Diabetes self-management education for adults with type 2 diabetes mellitus: A systematic review of the effect on glycemic control.	Patient Educ Couns. 2016	26658704		-	1		-	-	-	19		Exp Op	1	0
Efficacy of lifestyle interventions in patients with type 2 diabetes: A systematic review and meta-analysis.	Eur J Intern Med. 2016	26655787		1	1		-	-	2	-		PubMed	1	0
Benefits and Harms of Once-Weekly Glucagon-like Peptide-1 Receptor Agonist Treatments: A Systematic Review and Network Meta-analysis.	Ann Intern Med. 2016	26642233		1	1		-	-	8	-		PubMed	1	0
Lixisenatide in Patients with Type 2 Diabetes and Acute Coronary Syndrome.	N Engl J Med. 2015	26630143		1	1		-	1	-	-		PubMed	1	0
A randomized clinical trial evaluating the safety and efficacy of sitagliptin added to the combination of sulfonylurea and metformin in patients with type 2 diabetes mellitus and inadequate glycemic control.	J Diabetes. 2016	26625270		1	1		-	-	-	8		PubMed	1	0
Efficacy and safety of linagliptin as add-on therapy to basal insulin and metformin in people with Type 2 diabetes.	Diabet Med. 2016	26605991		1	1		-	-	-	14		PubMed	1	0
Long-term Glycemic Variability and Risk of Adverse Outcomes: A Systematic Review and Meta-analysis.	Diabetes Care. 2015	26604281		1	1		1	-	-	-		PubMed	1	0
Evaluation of the efficacy and safety of lixisenatide add-on treatment to basal insulin therapy among T2DM patients with different body mass indices from GetGoal trials.	Diabetol Metab Syndr. 2015	26594250		1	1		-	-	-	3		PubMed	1	0
Treatment intensification with an insulin degludec (IDeg)/insulin aspart (IAsp) co-formulation twice daily compared with basal IDeg and prandial IAsp in type 2 diabetes: a randomized, controlled phase III trial.	Diabetes Obes Metab. 2016	26592732		1	1		-	-	-	1		PubMed	1	0
Ten-year observational follow-up of PROactive: a randomized cardiovascular outcomes trial evaluating pioglitazone in type 2 diabetes.	Diabetes Obes Metab. 2016	26592506		1	1		-	1	-	-		PubMed	1	0
IDegLira Versus Alternative Intensification Strategies in Patients with Type 2 Diabetes Inadequately Controlled on Basal Insulin Therapy.	Diabetes Ther. 2015	26582052		1	1		-	-	-	2		PubMed	1	0
Efficacy and safety of once-weekly GLP-1 receptor agonist albiglutide (HARMONY 2): 52 week primary endpoint results from a randomised, placebo-controlled trial in patients with type 2 diabetes mellitus inadequately controlled with diet and exercise.	Diabetologia. 2016	26577795		1	1		-	-	8	-		PubMed	1	0
How much is too much? Outcomes in patients using high-dose insulin glargine.	Int J Clin Pract. 2016	26566714		1	1		-	-	7	-		PubMed	1	0
Effect of the EndoBarrier Gastrointestinal Liner on obesity and type 2 diabetes: a systematic review and meta-analysis.	Diabetes Obes Metab. 2016	26537317		1	1		-	-	5	-		PubMed	1	0
Liraglutide in people treated for type 2 diabetes with multiple daily insulin injections: randomised clinical trial (MDI Liraglutide trial).	BMJ. 2015	26512041		1	1		-	-	-	3		PubMed	1	0
Excess Mortality among Persons with Type 2 Diabetes.	N Engl J Med. 2015	26510021		1	1		1	-	-	-		PubMed	1	0
Efficacy and Cardiovascular Safety of Linagliptin as an Add-On to Insulin in Type 2 Diabetes: A Pooled Comprehensive Post Hoc Analysis.	Can J Diabetes. 2016	26474870		1	1		-	-	-	14		PubMed	1	0
Efficacy and safety of canagliflozin when used in conjunction with incretin-mimetic therapy in patients with type 2 diabetes.	Diabetes Obes Metab. 2016	26450639		1	1		-	-	-	22		PubMed	1	0
Behavioral Programs for Type 2 Diabetes Mellitus: A Systematic Review and Network Meta-analysis.	Ann Intern Med. 2015	26414227		1	1		-	-	-	19		PubMed	1	0
Efficacy and safety of once-weekly glucagon-like peptide 1 receptor agonists for the management of type 2 diabetes: a systematic review and meta-analysis of randomized controlled trials.	Diabetes Obes Metab. 2015	26395850		1	1		-	-	8	-		PubMed	1	0
Comparative efficacy of anti-diabetic agents on nonalcoholic fatty liver disease in patients with type 2 diabetes mellitus: a systematic review and meta-analysis of randomized and non-randomized studies.	Diabetes Metab Res Rev. 2016	26381272		1	1		-	10	-	-		PubMed	1	0
Empagliflozin, Cardiovascular Outcomes, and Mortality in Type 2 Diabetes.	N Engl J Med. 2015	26378978		1	1		-	1	-	-		PubMed	1	0
Bariatric-metabolic surgery versus conventional medical treatment in obese patients with type 2 diabetes: 5 year follow-up of an open-label, single-centre, randomised controlled trial.	Lancet. 2015	26369473		1	1		-	-	5	-		PubMed	1	0
Systematic review and meta-analysis of the efficacy and hypoglycemic safety of gliclazide versus other insulinotropic agents.	Diabetes Res Clin Pract. 2015	26361859		1	1		-	-	6	-		PubMed	1	0
Effect of orlistat on glycaemic control in overweight and obese patients with type 2 diabetes mellitus: a systematic review and meta-analysis of randomized controlled trials.	Obes Rev. 2015	26345590		1	1		-	-	3	-		PubMed	1	0
A randomized controlled trial comparing treatment with oral agents and basal insulin in elderly patients with type 2 diabetes in long-term care facilities.	BMJ Open Diabetes Res Care. 2015	26336609		1	1		-	5	-	-		PubMed	1	0
Randomized, Double-Blind Trial of Triple Therapy With Saxagliptin Add-on to Dapagliflozin Plus Metformin in Patients With Type 2 Diabetes.	Diabetes Care. 2015	26324329		1	1		-	-	-	4		PubMed	1	0
Empagliflozin as add-on to metformin plus sulphonylurea in patients with type 2 diabetes.	Diabetes Res Clin Pract. 2015	26324220		1	1		-	-	-	8		PubMed	1	0
Efficacy of Liraglutide for Weight Loss Among Patients With Type 2 Diabetes: The SCALE Diabetes Randomized Clinical Trial.	JAMA. 2015	26284720		1	1		-	-	3	-		PubMed	1	0
Combination therapy with insulin glargine plus metformin but not insulin glargine plus sulfonylurea provides similar glycemic control to triple oral combination therapy in patients with type 2 diabetes uncontrolled with dual oral agent therapy.	J Diabetes Complications. 2015	26281972		1	1		-	-	7	-		PubMed	1	0
Intensification of insulin therapy with basal-bolus or premixed insulin regimens in type 2 diabetes: a systematic review and meta-analysis of randomized controlled trials.	Endocrine. 2016	26281001		1	1		-	-	-	1		PubMed	1	0
Cardiovascular safety of albiglutide in the Harmony programme: a meta-analysis.	Lancet Diabetes Endocrinol. 2015	26276240		1	1		-	2	-	-		PubMed	1	0
Improving diabetes outcomes through lifestyle change--A randomized controlled trial.	Obesity (Silver Spring). 2015	26260043		1	1		-	-	2	-		PubMed	1	0
Cardiovascular and heart failure safety profile of vildagliptin: a meta-analysis of 17â€‰000 patients.	Diabetes Obes Metab. 2015	26250051		1	1		-	2	-	-		PubMed	1	0
Randomized, Double-Blind, Phase 3 Trial of Triple Therapy With Dapagliflozin Add-on to Saxagliptin Plus Metformin in Type 2 Diabetes.	Diabetes Care. 2015	26246458		1	1		-	-	-	4		PubMed	1	0
The Impact of Insulin Pump Therapy on Glycemic Profiles in Patients with Type 2 Diabetes: Data from the OpT2mise Study.	Diabetes Technol Ther. 2016	26241790		1	1		-	-	-	1		PubMed	1	0
Overcoming Clinical Inertia: A Randomized Clinical Trial of a Telehealth Remote Monitoring Intervention Using Paired Glucose Testing in Adults With Type 2 Diabetes.	J Med Internet Res. 2015	26199142		1	1		-	-	-	18		PubMed	1	0
Two-year outcomes on bone density and fracture incidence in patients with T2DM randomized to bariatric surgery versus intensive medical therapy.	Obesity (Silver Spring). 2015	26193177		1	1		-	-	5	-		PubMed	1	0
Efficacy and safety of liraglutide versus placebo added to basal insulin analogues (with or without metformin) in patients with type 2 diabetes: a randomized, placebo-controlled trial.	Diabetes Obes Metab. 2015	26179619		1	1		-	-	-	3		PubMed	1	0
Glycaemic control and hypoglycaemia with new insulin glargine 300 U/ml versus insulin glargine 100 U/ml in people with type 2 diabetes using basal insulin and oral antihyperglycaemic drugs: the EDITION 2 randomized 12-month trial including 6-month extension.	Diabetes Obes Metab. 2015	26172084		1	1		-	-	7	-		PubMed	1	0
Bariatric Surgery for Type 2 Diabetes Mellitus in Patients with BMI <30 kg/m2: A Systematic Review and Meta-Analysis.	PLoS One. 2015	26167910		1	1		-	-	5	-		PubMed	1	0
Use of a basal-plus insulin regimen in persons with type 2 diabetes stratified by age and body mass index: A pooled analysis of four clinical trials.	Prim Care Diabetes. 2016	26150328		1	1		-	-	-	1		PubMed	1	0
Empagliflozin as Add-on Therapy to Pioglitazone With or Without Metformin in Patients With Type 2 Diabetes Mellitus.	Clin Ther. 2015	26138864		1	1		-	-	16	-		PubMed	1	0
Incretin-based therapies for the treatment of non-alcoholic fatty liver disease: A systematic review and meta-analysis.	J Gastroenterol Hepatol. 2016	26111358		1	1		-	10	-	-		PubMed	1	0
Efficacy and safety of antihyperglycaemic drug regimens added to metformin and sulphonylurea therapy in Type 2 diabetes: a network meta-analysis.	Diabet Med. 2015	26104021		1	1		-	-	-	8		PubMed	1	0
Efficacy and Safety of Once-Weekly Dulaglutide Versus Insulin Glargine in Patients With Type 2 Diabetes on Metformin and Glimepiride (AWARD-2).	Diabetes Care. 2015	26089386		1	1		-	-	-	6		PubMed	1	0
Intensifying insulin regimen after basal insulin optimization in adults with type 2 diabetes: a 24-week, randomized, open-label trial comparing insulin glargine plus insulin glulisine with biphasic insulin aspart (LanScape).	Diabetes Obes Metab. 2015	26085028		1	1		-	-	-	1		PubMed	1	0
Efficacy and Safety of Canagliflozin Used in Conjunction with Sulfonylurea in Patients with Type 2 Diabetes Mellitus: A Randomized, Controlled Trial.	Diabetes Ther. 2015	26081793		1	1		-	-	10	-		PubMed	1	0
The efficacy and safety of DPP4 inhibitors compared to sulfonylureas as add-on therapy to metformin in patients with Type 2 diabetes: A systematic review and meta-analysis.	Diabetes Res Clin Pract. 2015	26059071		1	1		-	-	-	9		PubMed	1	0
Safety and tolerability of exenatide once weekly in patients with type 2 diabetes: an integrated analysis of 4,328 patients.	Diabetes Metab Syndr Obes. 2015	26056482		1	1		-	-	8	-		PubMed	1	0
Effect of Sitagliptin on Cardiovascular Outcomes in Type 2 Diabetes.	N Engl J Med. 2015	26052984		1	1		-	1	-	-		PubMed	1	0
Efficacy and Tolerability of Sitagliptin Compared with Glimepiride in Elderly Patients with Type 2 Diabetes Mellitus and Inadequate Glycemic Control: A Randomized, Double-Blind, Non-Inferiority Trial.	Drugs Aging. 2015	26041585		1	1		-	5	-	-		PubMed	1	0
Impact of empagliflozin added on to basal insulin in type 2 diabetes inadequately controlled on basal insulin: a 78-week randomized, double-blind, placebo-controlled trial.	Diabetes Obes Metab. 2015	26040302		1	1		-	-	-	7		PubMed	1	0
Follow-up of glycemic control and cardiovascular outcomes in type 2 diabetes.	N Engl J Med. 2015	26039600		1	1		3	1	-	-		PubMed	2	0
Empagliflozin as add-on to metformin in people with Type 2 diabetes.	Diabet Med. 2015	26031566		1	1		-	-	10	-		PubMed	1	0
Meta-analysis of studies examining medication adherence, persistence, and discontinuation of oral antihyperglycemic agents in type 2 diabetes.	Curr Med Res Opin. 2015	26023805		1	1		-	-	-	27		PubMed	1	0
Once-weekly dulaglutide versus bedtime insulin glargine, both in combination with prandial insulin lispro, in patients with type 2 diabetes (AWARD-4): a randomised, open-label, phase 3, non-inferiority study.	Lancet. 2015	26009229		1	1		-	-	-	6		PubMed	1	0
Comparison of vildagliptin as an add-on therapy and sulfonylurea dose-increasing therapy in patients with inadequately controlled type 2 diabetes using metformin and sulfonylurea (VISUAL study): A randomized trial.	Diabetes Res Clin Pract. 2015	26003889		1	1		-	-	-	8		PubMed	1	0
Cardiovascular safety of linagliptin in type 2 diabetes: a comprehensive patient-level pooled analysis of prospectively adjudicated cardiovascular events.	Cardiovasc Diabetol. 2015	25990013		1	1		-	2	-	-		PubMed	1	0
Insulin glargine compared with premixed insulin for management of insulin-naÃ¯ve type 2 diabetes patients uncontrolled on oral antidiabetic drugs: the open-label, randomized GALAPAGOS study.	J Diabetes Complications. 2015	25981123		1	1		-	-	-	1		PubMed	1	0
One-year efficacy and safety of a fixed combination of insulin degludec and liraglutide in patients with type 2 diabetes: results of a 26-week extension to a 26-week main trial.	Diabetes Obes Metab. 2015	25980900		1	1		-	-	-	2		PubMed	1	0
Roux-en-Y gastric bypass for diabetes (the Diabetes Surgery Study): 2-year outcomes of a 5-year, randomised, controlled trial.	Lancet Diabetes Endocrinol. 2015	25979364		1	1		-	-	5	-		PubMed	1	0
Basal-prandial versus premixed insulin in patients with type 2 diabetes requiring insulin intensification after basal insulin optimization: A 24-week randomized non-inferiority trial.	J Diabetes. 2016	25952532		1	1		-	-	-	1		PubMed	1	0
Effect of Intensive Versus Standard Blood Glucose Control in Patients With Type 2 Diabetes Mellitus in Different Regions of the World: Systematic Review and Meta-analysis of Randomized Controlled Trials.	J Am Heart Assoc. 2015	25944874		1	1		1	-	-	-		PubMed	1	0
Combination of the dipeptidyl peptidase-4 inhibitor linagliptin with insulin-based regimens in type 2 diabetes and chronic kidney disease.	Diab Vasc Dis Res. 2015	25941160		1	1		-	4	-	-		PubMed	1	0
Lifestyle weight-loss intervention outcomes in overweight and obese adults with type 2 diabetes: a systematic review and meta-analysis of randomized clinical trials.	J Acad Nutr Diet. 2015	25935570		1	1		-	-	2	-		PubMed	1	0
Similar efficacy and safety of LY2963016 insulin glargine and insulin glargine (LantusÂ®) in patients with type 2 diabetes who were insulin-naÃ¯ve or previously treated with insulin glargine: a randomized, double-blind controlled trial (the ELEMENT 2 study).	Diabetes Obes Metab. 2015	25931141		1	1		-	-	7	-		PubMed	1	0
Comparative efficacy and safety of antidiabetic drug regimens added to metformin monotherapy in patients with type 2 diabetes: a network meta-analysis.	PLoS One. 2015	25919293		1	1		-	-	13	-		PubMed	1	0
Safety and efficacy of once-weekly dulaglutide versus sitagliptin after 2â€‰years in metformin-treated patients with type 2 diabetes (AWARD-5): a randomized, phase III study.	Diabetes Obes Metab. 2015	25912221		1	1		-	-	-	5		PubMed	1	0
Vildagliptin versus insulin in patients with type 2 diabetes mellitus inadequately controlled with sulfonylurea: results from a randomized, 24 week study.	Curr Med Res Opin. 2015	25867771		1	1		-	-	9	-		PubMed	1	0
Dapagliflozin's Effects on Glycemia and Cardiovascular Risk Factors in High-Risk Patients With Type 2 Diabetes: A 24-Week, Multicenter, Randomized, Double-Blind, Placebo-Controlled Study With a 28-Week Extension.	Diabetes Care. 2015	25852208		1	1		-	2	-	-		PubMed	1	0
Long-term efficacy of sitagliptin as either monotherapy or add-on therapy to metformin: improvement in glycemic control over 2 years in patients with type 2 diabetes.	Curr Med Res Opin. 2015	25850968		1	1		-	-	9	-		PubMed	1	0
One-year sustained glycaemic control and less hypoglycaemia with new insulin glargine 300 U/ml compared with 100 U/ml in people with type 2 diabetes using basal plus meal-time insulin: the EDITION 1 12-month randomized trial, including 6-month extension.	Diabetes Obes Metab. 2015	25846721		1	1		-	-	7	-		PubMed	1	0
Treatment escalation options for patients with type 2 diabetes after failure of exenatide twice daily or glimepiride added to metformin: results from the prospective European Exenatide (EUREXA) study.	Diabetes Obes Metab. 2015	25846577		1	1		-	-	-	18		PubMed	1	0
A Randomized Clinical Trial to Evaluate the Efficacy and Safety of Co-Administration of Sitagliptin with Intensively Titrated Insulin Glargine.	Diabetes Ther. 2015	25820927		1	1		-	-	-	14		PubMed	1	0
TWO TREATMENT APPROACHES FOR HUMAN REGULAR U-500 INSULIN IN PATIENTS WITH TYPE 2 DIABETES NOT ACHIEVING ADEQUATE GLYCEMIC CONTROL ON HIGH-DOSE U-100 INSULIN THERAPY WITH OR WITHOUT ORAL AGENTS: A RANDOMIZED, TITRATION-TO-TARGET CLINICAL TRIAL.	Endocr Pract. 2015	25813411		1	1		-	-	-	1		PubMed	1	0
Efficacy and safety of linagliptin co-administered with low-dose metformin once daily versus high-dose metformin twice daily in treatment-naÃ¯ve patients with type 2 diabetes: a double-blind randomized trial.	Adv Ther. 2015	25805187		1	1		-	-	15	-		PubMed	1	0
Glucose-lowering drugs or strategies and cardiovascular outcomes in patients with or at risk for type 2 diabetes: a meta-analysis of randomised controlled trials.	Lancet Diabetes Endocrinol. 2015	25791290		1	1		1	6	-	-		PubMed	2	0
Heart failure and mortality outcomes in patients with type 2 diabetes taking alogliptin versus placebo in EXAMINE: a multicentre, randomised, double-blind trial.	Lancet. 2015	25765696		1	1		-	6	-	-		PubMed	1	0
Efficacy and tolerability of saxagliptin compared with glimepiride in elderly patients with type 2 diabetes: a randomized, controlled study (GENERATION).	Diabetes Obes Metab. 2015	25761977		1	1		-	5	-	-		PubMed	1	0
Long-term glycaemic response and tolerability of dapagliflozin versus a sulphonylurea as add-on therapy to metformin in patients with type 2 diabetes: 4-year data.	Diabetes Obes Metab. 2015	25735400		1	1		-	-	-	10		PubMed	1	0
Intensive glycaemic control and cognitive decline in patients with type 2 diabetes: a meta-analysis.	Endocr Connect. 2015	25712899		1	1		1	-	-	-		PubMed	1	0
Gender-based differences in glycaemic control and hypoglycaemia prevalence in patients with type 2 diabetes: results from patient-level pooled data of six randomized controlled trials.	Diabetes Obes Metab. 2015	25678212		1	1		-	-	7	-		PubMed	1	0
Initial combination of empagliflozin and linagliptin in subjects with type 2 diabetes.	Diabetes Care. 2015	25633662		1	1		-	-	-	4		PubMed	1	0
Biphasic vs basal bolus insulin regimen in TypeÂ 2 diabetes: a systematic review and meta-analysis of randomized controlled trials.	Diabet Med. 2015	25594251		1	1		-	-	-	1		PubMed	1	0
Dapagliflozin improves glycemic control and reduces body weight as add-on therapy to metformin plus sulfonylurea: a 24-week randomized, double-blind clinical trial.	Diabetes Care. 2015	25592197		1	1		-	-	-	8		PubMed	1	0
Clinical effectiveness of exenatide in diabetic patients waiting for bariatric surgery.	Obes Surg. 2015	25589020		1	1		-	11	-	-		PubMed	1	0
Combination of empagliflozin and linagliptin as second-line therapy in subjects with type 2 diabetes inadequately controlled on metformin.	Diabetes Care. 2015	25583754		1	1		-	-	-	4		PubMed	1	0
Saxagliptin and cardiovascular outcomes in patients with type 2 diabetes and moderate or severe renal impairment: observations from the SAVOR-TIMI 53 Trial.	Diabetes Care. 2015	25552421		1	1		-	4	-	-		PubMed	1	0
Safety and effectiveness of dipeptidyl peptidase-4 inhibitors versus intermediate-acting insulin or placebo for patients with type 2 diabetes failing two oral antihyperglycaemic agents: a systematic review and network meta-analysis.	BMJ Open. 2014	25537781		1	1		-	-	9	-		PubMed	1	0
Cardiovascular effects of dipeptidyl peptidase-4 inhibitors in diabetic patients: A meta-analysis.	Int J Cardiol. 2015	25528528		1	1		-	2	-	-		PubMed	1	0
Long-term efficacy and safety of canagliflozin over 104 weeks in patients aged 55-80 years with type 2 diabetes.	Diabetes Obes Metab. 2015	25495720		1	1		-	5	-	-		PubMed	1	0
Similar glucose control with basal-bolus regimen of insulin detemir plus insulin aspart and thrice-daily biphasic insulin aspart 30 in insulin-naive patients with type 2 diabetes: Results of a 50-week randomized clinical trial of stepwise insulin intensification.	Diabetes Metab. 2015	25483023		1	1		-	-	-	1		PubMed	1	0
Efficacy and safety of canagliflozin, an inhibitor of sodium-glucose cotransporter 2, when used in conjunction with insulin therapy in patients with type 2 diabetes.	Diabetes Care. 2015	25468945		1	1		-	-	-	7		PubMed	1	0
Mortality risk among sulfonylureas: a systematic review and network meta-analysis.	Lancet Diabetes Endocrinol. 2015	25466239		1	1		-	2	-	-		PubMed	1	0
Dapagliflozin in type 2 diabetes: effectiveness across the spectrum of disease and over time.	Int J Clin Pract. 2015	25438821		1	1		-	-	10	-		PubMed	1	0
Initial combination therapy with metformin, pioglitazone and exenatide is more effective than sequential add-on therapy in subjects with new-onset diabetes. Results from the Efficacy and Durability of Initial Combination Therapy for Type 2 Diabetes (EDICT): a randomized trial.	Diabetes Obes Metab. 2015	25425451		1	1		-	-	-	25		PubMed	1	0
Weight change in patients with type 2 diabetes starting basal insulin therapy: correlates and impact on outcomes.	Postgrad Med. 2014	25414938		1	1		-	-	7	-		PubMed	1	0
Vegetarian diets and glycemic control in diabetes: a systematic review and meta-analysis.	Cardiovasc Diagn Ther. 2014	25414824		1	1		-	-	2	-		PubMed	1	0
Efficacy and tolerability of albiglutide versus placebo or pioglitazone over 1â€‰year in people with type 2 diabetes currently taking metformin and glimepiride: HARMONY 5.	Diabetes Obes Metab. 2015	25406730		1	1		-	-	-	8		PubMed	1	0
Surgical versus medical treatment of type 2 diabetes mellitus in nonseverely obese patients: a systematic review and meta-analysis.	Ann Surg. 2015	25405560		1	1		-	-	5	-		PubMed	1	0
The HbA1c and all-cause mortality relationship in patients with type 2 diabetes is J-shaped: a meta-analysis of observational studies.	Rev Diabet Stud. 2014	25396402		1	1		1	-	-	-		PubMed	1	0
Insulin degludec improves long-term glycaemic control similarly to insulin glargine but with fewer hypoglycaemic episodes in patients with advanced type 2 diabetes on basal-bolus insulin therapy.	Diabetes Obes Metab. 2015	25387855		1	1		-	-	-	1		PubMed	1	0
Efficacy and safety of dapagliflozin monotherapy in people with Type 2 diabetes: a randomized double-blind placebo-controlled 102-week trial.	Diabet Med. 2015	25381876		1	1		-	-	10	-		PubMed	1	0
Effects of Mediterranean-style diet on glycemic control, weight loss and cardiovascular risk factors among type 2 diabetes individuals: a meta-analysis.	Eur J Clin Nutr. 2015	25369829		1	1		-	-	2	-		PubMed	1	0
Efficacy and safety of dipeptidyl peptidase-4 inhibitors in type 2 diabetes mellitus patients with moderate to severe renal impairment: a systematic review and meta-analysis.	PLoS One. 2014	25360775		1	1		-	4	-	-		PubMed	1	0
Comparison of insulin glargine and liraglutide added to oral agents in patients with poorly controlled type 2 diabetes.	Diabetes Obes Metab. 2015	25359159		1	1		-	-	-	6		PubMed	1	0
The long-term effects of bariatric surgery for type 2 diabetes: systematic review and meta-analysis of randomized and non-randomized evidence.	Obes Surg. 2015	25355456		1	1		-	-	5	-		PubMed	1	0
Dual add-on therapy in type 2 diabetes poorly controlled with metformin monotherapy: a randomized double-blind trial of saxagliptin plus dapagliflozin addition versus single addition of saxagliptin or dapagliflozin to metformin.	Diabetes Care. 2015	25352655		1	1		-	-	-	4		PubMed	1	0
Initial choice of oral glucose-lowering medication for diabetes mellitus: A patient-centered comparative effectiveness study	JAMA Intern Med. 2014	25347323		-	1		-	-	13	-		Exp Op	1	0
Indirect comparison of lixisenatide versus neutral protamine Hagedorn insulin as add-on to metformin and sulphonylurea in patients with type 2 diabetes mellitus.	Ger Med Sci. 2014	25332702		1	1		-	-	-	6		PubMed	1	0
Impact of walking on glycemic control and other cardiovascular risk factors in type 2 diabetes: a meta-analysis.	PLoS One. 2014	25329391		1	1		-	-	4	-		PubMed	1	0
Self-monitoring of blood glucose versus self-monitoring of urine glucose in adults with newly diagnosed Type 2 diabetes receiving structured education: a cluster randomized controlled trial.	Diabet Med. 2015	25308625		1	1		-	-	-	11		PubMed	1	0
Initial combination of linagliptin and metformin compared with linagliptin monotherapy in patients with newly diagnosed type 2 diabetes and marked hyperglycaemia: a randomized, double-blind, active-controlled, parallel group, multinational clinical trial.	Diabetes Obes Metab. 2015	25298165		1	1		-	-	15	-		PubMed	1	0
Sulfonylurea versus metformin monotherapy in patients with type 2 diabetes: a Cochrane systematic review and meta-analysis of randomized clinical trials and trial sequential analysis.	CMAJ Open. 2014	25295236		1	1		-	-	6	-		PubMed	1	0
The risk of heart failure associated with the use of noninsulin blood glucose-lowering drugs: systematic review and meta-analysis of published observational studies.	BMC Cardiovasc Disord. 2014	25260374		1	1		-	6	-	-		PubMed	1	0
Weight-loss therapy in type 2 diabetes: effects of phentermine and topiramate extended release.	Diabetes Care. 2014	25249652		1	1		-	-	3	-		PubMed	1	0
Efficacy and safety of linagliptin in subjects with long-standing type 2 diabetes mellitus (>10 years): evidence from pooled data of randomized, double-blind, placebo-controlled, phase III trials.	Clin Ther. 2014	25236917		1	1		-	-	9	-		PubMed	1	0
Management of endocrine disease. Effects of telecare intervention on glycemic control in type 2 diabetes: a systematic review and meta-analysis of randomized controlled trials.	Eur J Endocrinol. 2015	25227131		1	1		-	-	-	12		PubMed	1	0
Glucagon-like peptide-1 receptor agonist and basal insulin combination treatment for the management of type 2 diabetes: a systematic review and meta-analysis.	Lancet. 2014	25220191		1	1		-	-	-	3		PubMed	1	0
Long-term safety and tolerability of saxagliptin add-on therapy in older patients (aged â‰¥ 65 years) with type 2 diabetes.	Clin Interv Aging. 2014	25214775		1	1		-	5	-	-		PubMed	1	0
HARMONY 4: randomised clinical trial comparing once-weekly albiglutide and insulin glargine in patients with type 2 diabetes inadequately controlled with metformin with or without sulfonylurea.	Diabetologia. 2014	25208756		1	1		-	-	-	6		PubMed	1	0
Canagliflozin provides durable glycemic improvements and body weight reduction over 104 weeks versus glimepiride in patients with type 2 diabetes on metformin: a randomized, double-blind, phase 3 study.	Diabetes Care. 2015	25205142		1	1		-	-	-	10		PubMed	1	0
Heart failure, saxagliptin, and diabetes mellitus: observations from the SAVOR-TIMI 53 randomized trial.	Circulation. 2014	25189213		1	1		-	6	-	-		PubMed	1	0
Efficacy and safety of once-weekly glucagon-like peptide 1 receptor agonist albiglutide (HARMONY 1 trial): 52-week primary endpoint results from a randomized, double-blind, placebo-controlled trial in patients with type 2 diabetes mellitus not controlled on pioglitazone, with or without metformin.	Diabetes Obes Metab. 2014	25155146		1	1		-	-	-	15		PubMed	1	0
Lixisenatide treatment for older patients with type 2 diabetes mellitus uncontrolled on oral antidiabetics: meta-analysis of five randomized controlled trials.	Adv Ther. 2014	25143188		1	1		-	5	-	-		PubMed	1	0
Durability of the efficacy and safety of alogliptin compared with glipizide in type 2 diabetes mellitus: a 2-year study.	Diabetes Obes Metab. 2014	25132212		1	1		-	-	-	9		PubMed	1	0
Lixisenatide plus basal insulin in patients with type 2 diabetes mellitus: a meta-analysis.	J Diabetes Complications. 2014	25130920		1	1		-	-	-	3		PubMed	1	0
Efficacy and safety of lixisenatide in elderly (â‰¥65 years old) and very elderly (â‰¥75 years old) patients with type 2 diabetes: an analysis from the GetGoal phase III programme.	Diabetes Metab Res Rev. 2015	25115916		1	1		-	5	-	-		PubMed	1	0
Safety profile of dapagliflozin for type 2 diabetes: pooled analysis of clinical studies for overall safety and rare events.	Drug Saf. 2014	25096959		1	1		-	-	10	-		PubMed	1	0
The effect of the endoscopic duodenal-jejunal bypass liner on obesity and type 2 diabetes mellitus, a multicenter randomized controlled trial.	Ann Surg. 2014	25072436		1	1		-	-	5	-		PubMed	1	0
Efficacy and safety of canagliflozin in patients with type 2 diabetes and stage 3 nephropathy.	Am J Nephrol. 2014	25059406		1	1		-	4	-	-		PubMed	1	0
Efficacy and safety of colesevelam in combination with pioglitazone in patients with type 2 diabetes mellitus.	Horm Metab Res. 2014	25054436		1	1		-	-	16	-		PubMed	1	0
Efficacy and safety of the once-weekly GLP-1 receptor agonist albiglutide versus sitagliptin in patients with type 2 diabetes and renal impairment: a randomized phase III study.	Diabetes Care. 2014	25048383		1	1		-	-	-	5		PubMed	1	0
Online social networking services in the management of patients with diabetes mellitus: systematic review and meta-analysis of randomised controlled trials.	Diabetes Res Clin Pract. 2014	25043399		1	1		-	-	-	12		PubMed	1	0
Once-weekly dulaglutide versus once-daily liraglutide in metformin-treated patients with type 2 diabetes (AWARD-6): a randomised, open-label, phase 3, non-inferiority trial.	Lancet. 2014	25018121		1	1		-	-	8	-		PubMed	1	0
Safety and Tolerability of Linagliptin in Patients With Type 2 Diabetes: A Comprehensive Pooled Analysis of 22 Placebo-controlled Studies.	Clin Ther. 2014	25015594		1	1		-	-	9	-		PubMed	1	0
Combinational therapy with metformin and sodium-glucose cotransporter inhibitors in management of type 2 diabetes: systematic review and meta-analyses.	Diabetes Res Clin Pract. 2014	25015317		1	1		-	-	14	-		PubMed	1	0
Glucagon-like peptide 1 receptor agonist or bolus insulin with optimized basal insulin in type 2 diabetes.	Diabetes Care. 2014	25011946		1	1		-	-	-	6		PubMed	1	0
Comparison of repaglinide and metformin versus metformin alone for type 2 diabetes: a meta-analysis of randomized controlled trials.	Diabetes Res Clin Pract. 2014	25005849		1	1		-	-	12	-		PubMed	1	0
Insulin pump treatment compared with multiple daily injections for treatment of type 2 diabetes (OpT2mise): a randomised open-label controlled trial.	Lancet. 2014	24998009		1	1		-	-	-	1		PubMed	1	0
Impact of different training modalities on glycaemic control and blood lipids in patients with type 2 diabetes: a systematic review and network meta-analysis.	Diabetologia. 2014	24996616		1	1		-	-	4	-		PubMed	1	0
Aging and physical function in type 2 diabetes: 8 years of an intensive lifestyle intervention.	J Gerontol A Biol Sci Med Sci. 2015	24986062		1	1		-	-	2	-		PubMed	1	0
Efficacy and safety of canagliflozin over 52 weeks in patients with type 2 diabetes mellitus and chronic kidney disease.	Diabetes Obes Metab. 2014	24965700		1	1		-	4	-	-		PubMed	1	0
Comparison of empagliflozin and glimepiride as add-on to metformin in patients with type 2 diabetes: a 104-week randomised, active-controlled, double-blind, phase 3 trial.	Lancet Diabetes Endocrinol. 2014	24948511		1	1		-	-	-	10		PubMed	1	0
Improved glucose control with weight loss, lower insulin doses, and no increased hypoglycemia with empagliflozin added to titrated multiple daily injections of insulin in obese inadequately controlled type 2 diabetes.	Diabetes Care. 2014	24929430		1	1		-	-	-	7		PubMed	1	0
Dapagliflozin added to glimepiride in patients with type 2 diabetes mellitus sustains glycemic control and weight loss over 48Â weeks: a randomized, double-blind, parallel-group, placebo-controlled trial.	Diabetes Ther. 2014	24920277		1	1		-	-	10	-		PubMed	1	0
Durability of glycaemic efficacy over 2 years with dapagliflozin versus glipizide as add-on therapies in patients whose type 2 diabetes mellitus is inadequately controlled with metformin.	Diabetes Obes Metab. 2014	24919526		1	1		-	-	-	10		PubMed	1	0
Glycaemic durability with dipeptidyl peptidase-4 inhibitors in type 2 diabetes: a systematic review and meta-analysis of long-term randomised controlled trials.	BMJ Open. 2014	24916090		1	1		-	-	9	-		PubMed	1	0
Roux-en-Y gastric bypass surgery or lifestyle with intensive medical management in patients with type 2 diabetes: feasibility and 1-year results of a randomized clinical trial.	JAMA Surg. 2014	24899464		1	1		-	-	5	-		PubMed	1	0
HARMONY 3: 104-week randomized, double-blind, placebo- and active-controlled trial assessing the efficacy and safety of albiglutide compared with placebo, sitagliptin, and glimepiride in patients with type 2 diabetes taking metformin.	Diabetes Care. 2014	24898304		1	1		-	-	-	5		PubMed	1	0
Advancing basal insulin replacement in type 2 diabetes inadequately controlled with insulin glargine plus oral agents: a comparison of adding albiglutide, a weekly GLP-1 receptor agonist, versus thrice-daily prandial insulin lispro.	Diabetes Care. 2014	24898300		1	1		-	-	-	6		PubMed	1	0
Dapagliflozin added to usual care in individuals with type 2 diabetes mellitus with preexisting cardiovascular disease: a 24-week, multicenter, randomized, double-blind, placebo-controlled study with a 28-week extension.	J Am Geriatr Soc. 2014	24890683		1	1		-	2	-	-		PubMed	1	0
Efficacy and safety of dulaglutide added onto pioglitazone and metformin versus exenatide in type 2 diabetes in a randomized controlled trial (AWARD-1).	Diabetes Care. 2014	24879836		1	1		-	-	-	15		PubMed	1	0
Safety and efficacy of the dipeptidyl peptidase-4 inhibitor linagliptin in elderly patients with type 2 diabetes: a comprehensive analysis of data from 1331 individuals aged â‰¥ 65 years.	Diabetes Obes Metab. 2014	24865132		1	1		-	5	-	-		PubMed	1	0
Reduced risk of hypoglycemia with once-daily glargine versus twice-daily NPH and number needed to harm with NPH to demonstrate the risk of one additional hypoglycemic event in type 2 diabetes: Evidence from a long-term controlled trial.	J Diabetes Complications. 2014	24856612		1	1		-	-	7	-		PubMed	1	0
Efficacy and safety of dulaglutide monotherapy versus metformin in type 2 diabetes in a randomized controlled trial (AWARD-3).	Diabetes Care. 2014	24842985		1	1		-	-	8	-		PubMed	1	0
The safety of dipeptidyl peptidase-4 (DPP-4) inhibitors or sodium-glucose cotransporter 2 (SGLT-2) inhibitors added to metformin background therapy in patients with type 2 diabetes mellitus: a systematic review and meta-analysis.	Diabetes Metab Res Rev. 2014	24829965		1	1		-	-	-	16		PubMed	1	0
Factors associated with weight gain in people with type 2 diabetes starting on insulin.	Diabetes Care. 2014	24824546		1	1		-	-	7	-		PubMed	1	0
Linagliptin improved glycaemic control without weight gain or hypoglycaemia in patients with type 2 diabetes inadequately controlled by a combination of metformin and pioglitazone: a 24-week randomized, double-blind study.	Diabet Med. 2014	24824197		1	1		-	-	16	-		PubMed	1	0
Benefits of exenatide on obesity and non-alcoholic fatty liver disease with elevated liver enzymes in patients with type 2 diabetes.	Diabetes Metab Res Rev. 2014	24823873		1	1		-	10	-	-		PubMed	1	0
Impact of visit-to-visit glycemic variability on the risks of macrovascular and microvascular events and all-cause mortality in type 2 diabetes: the ADVANCE trial.	Diabetes Care. 2014	24812434		1	1		1	-	-	-		PubMed	1	0
Comparison of insulin degludec/insulin aspart and biphasic insulin aspart 30 in uncontrolled, insulin-treated type 2 diabetes: a phase 3a, randomized, treat-to-target trial.	Diabetes Care. 2014	24812432		1	1		-	-	-	1		PubMed	1	0
Efficacy and safety of empagliflozin added to existing antidiabetes treatment in patients with type 2 diabetes and chronic kidney disease: a randomised, double-blind, placebo-controlled trial.	Lancet Diabetes Endocrinol. 2014	24795251		1	1		-	4	-	-		PubMed	1	0
Health education via mobile text messaging for glycemic control in adults with type 2 diabetes: a systematic review and meta-analysis.	Prim Care Diabetes. 2014	24793589		1	1		-	-	-	12		PubMed	1	0
Weight loss, glycemic control, and cardiovascular disease risk factors in response to differential diet composition in a weight loss program in type 2 diabetes: a randomized controlled trial.	Diabetes Care. 2014	24760261		1	1		-	-	2	-		PubMed	1	0
AUTONOMY: the first randomized trial comparing two patient-driven approaches to initiate and titrate prandial insulin lispro in type 2 diabetes.	Diabetes Care. 2014	24742662		1	1		-	-	-	1		PubMed	1	0
Efficacy and safety of dulaglutide versus sitagliptin after 52 weeks in type 2 diabetes in a randomized controlled trial (AWARD-5).	Diabetes Care. 2014	24742660		1	1		-	-	-	5		PubMed	1	0
Efficacy and safety of canagliflozin compared with placebo in older patients with type 2 diabetes mellitus: a pooled analysis of clinical studies.	BMC Endocr Disord. 2014	24742013		1	1		-	5	-	-		PubMed	1	0
Exenatide once weekly versus insulin glargine for type 2 diabetes (DURATION-3): 3-year results of an open-label randomised trial.	Lancet Diabetes Endocrinol. 2014	24731672		1	1		-	-	-	6		PubMed	1	0
Insulin lispro low mixture twice daily versus basal insulin glargine once daily and prandial insulin lispro once daily in patients with type 2 diabetes requiring insulin intensification: a randomized phase IV trial.	Diabetes Obes Metab. 2014	24725616		1	1		-	-	-	1		PubMed	1	0
The effects of a Mediterranean diet on the need for diabetes drugs and remission of newly diagnosed type 2 diabetes: follow-up of a randomized trial.	Diabetes Care. 2014	24722497		1	1		-	-	2	-		PubMed	1	0
Comparison of effects of gliclazide, metformin and pioglitazone monotherapies on glycemic control and cardiovascular risk factors in patients with newly diagnosed uncontrolled type 2 diabetes mellitus.	Exp Clin Endocrinol Diabetes. 2014	24710641		1	1		-	-	13	-		PubMed	1	0
The efficacy of dapagliflozin combined with hypoglycaemic drugs in treating type 2 diabetes mellitus: meta-analysis of randomised controlled trials.	BMJ Open. 2014	24710132		1	1		-	-	10	-		PubMed	1	0
Once-weekly albiglutide versus once-daily liraglutide in patients with type 2 diabetes inadequately controlled on oral drugs (HARMONY 7): a randomised, open-label, multicentre, non-inferiority phase 3 study.	Lancet Diabetes Endocrinol. 2014	24703047		1	1		-	-	8	-		PubMed	1	0
Lixisenatide as add-on to oral anti-diabetic therapy: an effective treatment for glycaemic control with body weight benefits in type 2 diabetes.	Diabetes Metab Res Rev. 2014	24687427		1	1		-	-	8	-		PubMed	1	0
Bariatric surgery versus intensive medical therapy for diabetes--3-year outcomes.	N Engl J Med. 2014	24679060		1	1		-	-	5	-		PubMed	1	0
Comparative effectiveness of dipeptidylpeptidase-4 inhibitors in type 2 diabetes: a systematic review and mixed treatment comparison.	Diabetes Ther. 2014	24664619		1	1		-	-	9	-		PubMed	1	0
The long-term efficacy and safety of DPP-IV inhibitors monotherapy and in combination with metformin in 18,980 patients with type-2 diabetes mellitus--a meta-analysis.	Pharmacoepidemiol Drug Saf. 2014	24639059		1	1		-	-	9	-		PubMed	1	0
A meta-analysis of the hypoglycaemic risk in randomized controlled trials with sulphonylureas in patients with type 2 diabetes.	Diabetes Obes Metab. 2014	24635837		1	1		-	-	6	-		PubMed	1	0
Acarbose compared with metformin as initial therapy in patients with newly diagnosed type 2 diabetes: an open-label, non-inferiority randomised trial.	Lancet Diabetes Endocrinol. 2014	24622668		1	1		-	-	11	-		PubMed	1	0
Treatment intensification with stepwise addition of prandial insulin aspart boluses compared with full basal-bolus therapy (FullSTEP Study): a randomised, treat-to-target clinical trial.	Lancet Diabetes Endocrinol. 2014	24622667		1	1		-	-	-	1		PubMed	1	0
Outcomes of combined cardiovascular risk factor management strategies in type 2 diabetes: the ACCORD randomized trial.	Diabetes Care. 2014	24595629		1	1		2	-	-	-		PubMed	1	0
Longitudinal effects of medication nonadherence on glycemic control.	Ann Pharmacother. 2014	24586059		-	1		-	-	-	27		Exp Op	1	0
Step counter use in type 2 diabetes: a meta-analysis of randomized controlled trials.	BMC Med. 2014	24571580		1	1		-	-	4	-		PubMed	1	0
Safety and efficacy of gliclazide as treatment for type 2 diabetes: a systematic review and meta-analysis of randomized trials.	PLoS One. 2014	24533045		1	1		-	-	6	-		PubMed	1	0
Efficacy and safety of canagliflozin over 52 weeks in patients with type 2 diabetes on background metformin and pioglitazone.	Diabetes Obes Metab. 2014	24528605		1	1		-	-	10	-		PubMed	1	0
Safety of sitagliptin in elderly patients with type 2 diabetes: a pooled analysis of 25 clinical studies.	Drugs Aging. 2014	24510656		1	1		-	-	9	-		PubMed	1	0
Assessment of the cardiovascular safety of saxagliptin in patients with type 2 diabetes mellitus: pooled analysis of 20 clinical trials.	Cardiovasc Diabetol. 2014	24490835		1	1		-	2	-	-		PubMed	1	0
Glucagon-like peptide-1 receptor agonists and pancreatitis: a meta-analysis of randomized clinical trials.	Diabetes Res Clin Pract. 2014	24485345		1	1		-	-	8	-		PubMed	1	0
Effects of pioglitazone on macrovascular events in patients with type 2 diabetes mellitus at high risk of stroke: the PROFIT-J study.	J Atheroscler Thromb. 2014	24477028		1	1		-	1	-	-		PubMed	1	0
A comparison of biphasic insulin aspart and insulin glargine administered with oral antidiabetic drugs in type 2 diabetes mellitus--a systematic review and meta-analysis.	Int J Clin Pract. 2014	24471814		1	1		-	-	-	1		PubMed	1	0
A comparison of adding liraglutide versus a single daily dose of insulin aspart to insulin degludec in subjects with type 2 diabetes (BEGIN: VICTOZA ADD-ON).	Diabetes Obes Metab. 2014	24443830		1	1		-	-	-	3		PubMed	1	0
Efficacy and safety of initial combination therapy with alogliptin plus metformin versus either as monotherapy in drug-naÃ¯ve patients with type 2 diabetes: a randomized, double-blind, 6-month study.	Diabetes Obes Metab. 2014	24400655		1	1		-	-	15	-		PubMed	1	0
Urinary tract infection in randomized phase III studies of canagliflozin, a sodium glucose co-transporter 2 inhibitor.	Postgrad Med. 2014	24393747		1	1		-	-	10	-		PubMed	1	0
Safety of saxagliptin: events of special interest in 9156 patients with type 2 diabetes mellitus.	Diabetes Metab Res Rev. 2014	24376173		1	1		-	-	9	-		PubMed	1	0
Efficacy and safety of insulin lispro in obese patients with type 2 diabetes: a retrospective metaanalysis of 7 randomized controlled trials.	Endocr Pract. 2014	24325997		1	1		-	-	-	1		PubMed	1	0
Canagliflozin versus glimepiride treatment in patients with type 2 diabetes inadequately controlled with metformin (CANTATA-SU trial).	Expert Rev Clin Pharmacol. 2014	24308786		1	1		-	-	-	10		PubMed	1	0
Eight-year weight losses with an intensive lifestyle intervention: the look AHEAD study.	Obesity (Silver Spring). 2014	24307184		1	1		-	-	2	-		PubMed	1	0
Comparison of insulin lispro protamine suspension versus insulin glargine once daily added to oral antihyperglycaemic medications and exenatide in type 2 diabetes: a prospective randomized open-label trial.	Diabetes Obes Metab. 2014	24298995		1	1		-	-	7	-		PubMed	1	0
Resistance exercise versus aerobic exercise for type 2 diabetes: a systematic review and meta-analysis.	Sports Med. 2014	24297743		1	1		-	-	4	-		PubMed	1	0
Intensification of medication and glycaemic control among patients with type 2 diabetesÂ -Â the ADVANCE trial.	Diabetes Obes Metab. 2014	24251579		1	1		1	-	-	-		PubMed	1	0
Once-daily prandial lixisenatide versus once-daily rapid-acting insulin in patients with type 2 diabetes mellitus insufficiently controlled with basal insulin: analysis of data from five randomized, controlled trials.	J Diabetes Complications. 2014	24246441		1	1		-	-	-	6		PubMed	1	0
Dapagliflozin compared with other oral anti-diabetes treatments when added to metformin monotherapy: a systematic review and network meta-analysis.	Diabetes Obes Metab. 2014	24237939		1	1		-	-	14	-		PubMed	1	0
A randomized controlled trial of the efficacy and safety of saxagliptin as add-on therapy in patients with type 2 diabetes and inadequate glycaemic control on metformin plus a sulphonylurea.	Diabetes Obes Metab. 2014	24205943		1	1		-	-	-	8		PubMed	1	0
Early combination therapy for the treatment of type 2 diabetes mellitus: systematic review and meta-analysis.	Diabetes Obes Metab. 2014	24205921		1	1		-	-	-	25		PubMed	1	0
Efficacy and safety of vildagliptin in patients with type 2 diabetes mellitus inadequately controlled with dual combination of metformin and sulphonylurea.	Diabetes Obes Metab. 2014	24199686		1	1		-	-	-	8		PubMed	1	0
Effects of randomization to intensive glucose control on adverse events, cardiovascular disease, and mortality in older versus younger adults in the ACCORD Trial.	Diabetes Care. 2014	24170759		1	1		-	5	-	-		PubMed	1	0
Use of glucagon-like peptide-1 receptor agonists and bone fractures: a meta-analysis of randomized clinical trials.	J Diabetes. 2014	24164867		1	1		-	-	8	-		PubMed	1	0
Dapagliflozin is effective as add-on therapy to sitagliptin with or without metformin: a 24-week, multicenter, randomized, double-blind, placebo-controlled study.	Diabetes Care. 2014	24144654		1	1		-	-	-	4		PubMed	1	0
Head-to-head comparison of dipeptidyl peptidase-IV inhibitors and sulfonylureas - a meta-analysis from randomized clinical trials.	Diabetes Metab Res Rev. 2014	24123720		1	1		-	-	-	9		PubMed	1	0
Randomized, 1-year comparison of three ways to initiate and advance insulin for type 2 diabetes: twice-daily premixed insulin versus basal insulin with either basal-plus one prandial insulin or basal-bolus up to three prandial injections.	Diabetes Obes Metab. 2014	24118931		1	1		-	-	-	1		PubMed	1	0
Efficacy and safety of lixisenatide once daily vs. placebo in people with Type 2 diabetes insufficiently controlled on metformin (GetGoal-F1).	Diabet Med. 2014	24117597		1	1		-	-	8	-		PubMed	1	0
Long-term efficacy and safety of canagliflozin monotherapy in patients with type 2 diabetes inadequately controlled with diet and exercise: findings from the 52-week CANTATA-M study.	Curr Med Res Opin. 2014	24073995		1	1		-	-	10	-		PubMed	1	0
Long-term study of patients with type 2 diabetes and moderate renal impairment shows that dapagliflozin reduces weight and blood pressure but does not improve glycemic control.	Kidney Int. 2014	24067431		1	1		-	4	-	-		PubMed	1	0
The incidence of mild and severe hypoglycaemia in patients with type 2 diabetes mellitus treated with sulfonylureas: a systematic review and meta-analysis.	Diabetes Metab Res Rev. 2014	24030920		1	1		-	-	6	-		PubMed	1	0
Dapagliflozin in patients with type 2 diabetes receiving high doses of insulin: efficacy and safety over 2 years.	Diabetes Obes Metab. 2014	23911013		1	1		-	-	-	7		PubMed	1	0
Efficacy and safety of initial combination treatment with sitagliptin and pioglitazone--a factorial study.	Diabetes Obes Metab. 2014	23909985		1	1		-	-	16	-		PubMed	1	0
Dapagliflozin maintains glycaemic control while reducing weight and body fat mass over 2 years in patients with type 2 diabetes mellitus inadequately controlled on metformin.	Diabetes Obes Metab. 2014	23906445		1	1		-	-	10	-		PubMed	1	0
Empagliflozin improves glycaemic and weight control as add-on therapy to pioglitazone or pioglitazone plus metformin in patients with type 2 diabetes: a 24-week, randomized, placebo-controlled trial.	Diabetes Obes Metab. 2014	23906415		1	1		-	-	16	-		PubMed	1	0
Efficacy and safety of dipeptidyl peptidase-4 inhibitors and metformin as initial combination therapy and as monotherapy in patients with type 2 diabetes mellitus: a meta-analysis.	Diabetes Obes Metab. 2014	23803146		1	1		-	-	15	-		PubMed	1	0
Clinical Impact of ITCA 650, a Novel Drug-Device GLP-1 Receptor Agonist, in Uncontrolled Type 2 Diabetes and Very High Baseline HbA(1c): The FREEDOM-1 HBL (High Baseline) Study.	Diabetes Care. 2018	29301824		1	0		-	-	-	-		PubMed	0	0
Efficacy and Safety of ITCA 650, a Novel Drug-Device GLP-1 Receptor Agonist, in Type 2 Diabetes Uncontrolled With Oral Antidiabetes Drugs: The FREEDOM-1 Trial.	Diabetes Care. 2018	29242349		1	0		-	-	-	-		PubMed	0	0
Efficacy and safety of twice-daily treatment with canagliflozin, a sodium glucose co-transporter 2 inhibitor, added on to metformin monotherapy in patients with type 2 diabetes mellitus.	J Clin Transl Endocrinol. 2014	29159083		1	0		-	-	-	-		PubMed	0	0
Canagliflozin in Conjunction With Sulfonylurea Maintains Glycemic Control and Weight Loss Over 52 Weeks: A Randomized, Controlled Trial in Patients With Type 2 Diabetes Mellitus.	Clin Ther. 2017	29103664		1	0		-	-	-	-		PubMed	0	0
Linagliptin versus sitagliptin in patients with type 2 diabetes mellitus: a network meta-analysis of randomized clinical trials.	Daru. 2017	29070077		1	0		-	-	-	-		PubMed	0	0
The association between metformin use and colorectal cancer survival among patients with diabetes mellitus: An updated meta-analysis.	Chronic Dis Transl Med. 2017	29063073		1	0		-	-	-	-		PubMed	0	0
Adverse drug effects observed with vildagliptin versus pioglitazone or rosiglitazone in the treatment of patients with type 2 diabetes mellitus: a systematic review and meta-analysis of randomized controlled trials.	BMC Pharmacol Toxicol. 2017	29058622		1	0		-	-	-	-		PubMed	0	0
Effect of Oral Semaglutide Compared With Placebo and Subcutaneous Semaglutide on Glycemic Control in Patients With Type 2 Diabetes: A Randomized Clinical Trial.	JAMA. 2017	29049653		1	0		-	-	-	-		PubMed	0	0
Effects of exenatide twice daily, exenatide once weekly or insulin in patients with type 2 diabetes and baseline HbA1c â‰¥10.0%: Two pooled analyses including 20 randomised controlled trials.	Int J Clin Pract. 2017	29044860		1	0		-	-	-	-		PubMed	0	0
Health education for patients with acute coronary syndrome and type 2 diabetes mellitus: an umbrella review of systematic reviews and meta-analyses.	BMJ Open. 2017	29042383		1	0		-	-	-	-		PubMed	0	0
Metformin and Î²-cell function in insulin-treated patients with type 2 diabetes: A randomized placebo-controlled 4.3-year trial.	Diabetes Obes Metab. 2017	28967181		1	0		-	-	-	-		PubMed	0	0
The Effectiveness of Green Tea or Green Tea Extract on Insulin Resistance and Glycemic Control in Type 2 Diabetes Mellitus: A Meta-Analysis.	Diabetes Metab J. 2017	28868822		1	0		-	-	-	-		PubMed	0	0
Physical activity and change in fasting glucose and HbA1c: a quantitative meta-analysis of randomized trials.	Acta Diabetol. 2017	28840356		1	0		-	-	-	-		PubMed	0	0
Canagliflozin: A Review in Type 2 Diabetes.	Drugs. 2017	28836175		1	0		-	-	-	-		PubMed	0	0
Three-year efficacy and safety of exenatide once weekly: A pooled analysis of three trials.	J Diabetes Complications. 2017	28669463		1	0		-	-	-	-		PubMed	0	0
Insulin Glargine/Lixisenatide: A Review in Type 2 Diabetes.	Drugs. 2017	28667587		1	0		-	-	-	-		PubMed	0	0
Effect of insulin degludec versus insulin glargine on glycemic control and daily fasting blood glucose variability in insulin-naÃ¯ve Japanese patients with type 2 diabetes: I'D GOT trial.	Diabetes Res Clin Pract. 2017	28651211		1	0		-	-	-	-		PubMed	0	0
Secondary Prevention of Cardiovascular Disease in Patients With Type 2 Diabetes Mellitus: International Insights From the TECOS Trial (Trial Evaluating Cardiovascular Outcomes With Sitagliptin).	Circulation. 2017	28626088		1	0		-	-	-	-		PubMed	0	0
A Randomized Controlled Trial of Vildagliptin Versus Alogliptin: Effective Switch From Sitagliptin in Patients With Type 2 Diabetes.	J Clin Med Res. 2017	28611856		1	0		-	-	-	-		PubMed	0	0
The Effect of a Vegetarian vs Conventional Hypocaloric Diabetic Diet on Thigh Adipose Tissue Distribution in Subjects with Type 2 Diabetes: A Randomized Study.	J Am Coll Nutr. 2017	28604251		1	0		-	-	-	-		PubMed	0	0
Comment on: Sodium-glucose co-transporter-2 inhibitors and risk of adverse renal outcomes among type 2 diabetes patients: A network and cumulative meta-analysis of randomized controlled trials.	Diabetes Obes Metab. 2017	28598577		1	0		-	-	-	-		PubMed	0	0
A network meta-analysis for efficacy and safety of seven regimens in the treatment of type II diabetes.	Biomed Pharmacother. 2017	28586742		1	0		-	-	-	-		PubMed	0	0
Lifestyle-tailored interventions for South Asians with type 2 diabetes living in high-income countries: a systematic review.	Acta Diabetol. 2017	28585044		1	0		-	-	-	-		PubMed	0	0
Randomized Controlled Trial of Technology-Assisted Case Management in Low Income Adults with Type 2 Diabetes.	Diabetes Technol Ther. 2017	28581821		1	0		-	-	-	-		PubMed	0	0
The effect of alpha-linolenic acid on glycemic control in individuals with type 2 diabetes: A systematic review and meta-analysis of randomized controlled clinical trials.	Medicine (Baltimore). 2017	28538363		1	0		-	-	-	-		PubMed	0	0
The use of lipid-lowering therapy and effects of antihyperglycaemic therapy on lipids in subjects with type 2 diabetes with or without cardiovascular disease: a pooled analysis of data from eleven randomized trials with insulin glargine 100Â U/mL.	Cardiovasc Diabetol. 2017	28526014		1	0		-	-	-	-		PubMed	0	0
Treatment with GLP1 receptor agonists reduce serum CRP concentrations in patients with type 2 diabetes mellitus: A systematic review and meta-analysis of randomized controlled trials.	J Diabetes Complications. 2017	28479155		1	0		-	-	-	-		PubMed	0	0
Efficacy and Safety of Single- or Double-Drug Antidiabetic Regimens in the Treatment of Type 2 Diabetes Mellitus: A Network Meta-Analysis.	J Cell Biochem. 2017	28471499		1	0		-	-	-	-		PubMed	0	0
Glycaemic control in people with type 2 diabetes mellitus during and after cancer treatment: A systematic review and meta-analysis.	PLoS One. 2017	28467470		1	0		-	-	-	-		PubMed	0	0
Once-weekly dipeptidyl peptidase-4 inhibitors for type 2 diabetes: a systematic review and meta-analysis.	Expert Opin Pharmacother. 2017	28448177		1	0		-	-	-	-		PubMed	0	0
Use of GLP-1 receptor agonists for type 2 diabetes treatment intensification after basal insulin failure.	Diabetes Metab. 2017	28431670		1	0		-	-	-	-		PubMed	0	0
The effect of flour from the rind of the yellow passion fruit on glycemic control of people with diabetes mellitus type 2: a randomized clinical trial.	J Diabetes Metab Disord. 2017	28428951		1	0		-	-	-	-		PubMed	0	0
Spotlight on Canagliflozin 300: review of its efficacy and an indirect comparison to other SGLT-2 inhibitors and long-acting GLP-1 receptor agonists.	Expert Rev Clin Pharmacol. 2017	28393583		1	0		-	-	-	-		PubMed	0	0
Factors associated with improved glycemic control following continuous subcutaneous insulin infusion therapy in patients with type 2 diabetes uncontrolled with bolus-basal insulin regimens: An analysis from the OpT2mise randomized trial.	Diabetes Obes Metab. 2017	28374511		1	0		-	-	-	-		PubMed	0	0
Efficacy of Exenatide Plus Pioglitazone Vs Basal/Bolus Insulin in T2DM Patients With Very High HbA1c.	J Clin Endocrinol Metab. 2017	28324038		1	0		-	-	-	-		PubMed	0	0
Weight losses with low-energy formula diets in obese patients with and without type 2 diabetes: systematic review and meta-analysis.	Int J Obes (Lond). 2017	28290463		1	0		-	-	-	-		PubMed	0	0
Albiglutide for the treatment of type 2 diabetes mellitus: An integrated safety analysis of the HARMONY phase 3 trials.	Diabetes Res Clin Pract. 2017	28284167		1	0		-	-	-	-		PubMed	0	0
Comparative Effectiveness of Adding Alogliptin to Metformin Plus Sulfonylurea with Other DPP-4 Inhibitors in Type 2 Diabetes: A Systematic Review and Network Meta-Analysis.	Diabetes Ther. 2017	28275958		1	0		-	-	-	-		PubMed	0	0
Lixisenatide reduces glycaemic variability in insulin-treated patients with type 2 diabetes.	Diabetes Obes Metab. 2017	28256054		1	0		-	-	-	-		PubMed	0	0
Incretin-based agents in type 2 diabetic patients at cardiovascular risk: compare the effect of GLP-1 agonists and DPP-4 inhibitors on cardiovascular and pancreatic outcomes.	Cardiovasc Diabetol. 2017	28249585		1	0		-	-	-	-		PubMed	0	0
Vildagliptin, but not glibenclamide, increases circulating endothelial progenitor cell number: a 12-month randomized controlled trial in patients with type 2 diabetes.	Cardiovasc Diabetol. 2017	28231835		1	0		-	-	-	-		PubMed	0	0
Weight loss technology for people with treated type 2 diabetes: a randomized controlled trial.	Nutr Metab (Lond). 2017	28163748		1	0		-	-	-	-		PubMed	0	0
Sodium-Glucose Co-Transporter-2 (SGLT2) Inhibitors: Comparing Trial and Real World Use (Study Protocol).	Diabetes Ther. 2017	28138853		1	0		-	-	-	-		PubMed	0	0
Liraglutide effects on beta-cell, insulin sensitivity and glucose effectiveness in patients with stable coronary artery disease and newly diagnosed type 2 diabetes.	Diabetes Obes Metab. 2017	28124822		1	0		-	-	-	-		PubMed	0	0
Safety and efficacy of IDegLira titrated once weekly versus twice weekly in patients with type 2 diabetes uncontrolled on oral antidiabetic drugs: DUAL VI randomized clinical trial.	Diabetes Obes Metab. 2017	28124817		1	0		-	-	-	-		PubMed	0	0
SGLT-2 Inhibitors and Cardiovascular Risk in Diabetes Mellitus: A Comprehensive and Critical Review of the Literature.	Curr Pharm Des. 2017	28120716		1	0		-	-	-	-		PubMed	0	0
Phase III, efficacy and safety study of ertugliflozin monotherapy in people with type 2 diabetes mellitus inadequately controlled with diet and exercise alone.	Diabetes Obes Metab. 2017	28116776		1	0		-	-	-	-		PubMed	0	0
Randomized clinical trial comparing the efficacy and safety of treatment with the once-weekly dipeptidyl peptidase-4 (DPP-4) inhibitor omarigliptin or the once-daily DPP-4 inhibitor sitagliptin in patients with type 2 diabetes inadequately controlled on metformin monotherapy.	Diabetes Obes Metab. 2017	28093853		1	0		-	-	-	-		PubMed	0	0
Liraglutide Versus SGLT-2 Inhibitors in People with Type 2 Diabetes: A Network Meta-Analysis.	Diabetes Ther. 2017	27995594		1	0		-	-	-	-		PubMed	0	0
Short and Long Term Effects of a DPP-4 Inhibitor Versus Bedtime NPH Insulin as ADD-ON Therapy in Patients with Type 2 Diabetes.	Curr Pharm Des. 2016	27928958		1	0		-	-	-	-		PubMed	0	0
Treatment for 6Â months with fish oil-derived n-3 polyunsaturated fatty acids has neutral effects on glycemic control but improves dyslipidemia in type 2 diabetic patients with abdominal obesity: a randomized, double-blind, placebo-controlled trial.	Eur J Nutr. 2017	27913872		1	0		-	-	-	-		PubMed	0	0
Liraglutide improves metabolic parameters and carotid intima-media thickness in diabetic patients with the metabolic syndrome: an 18-month prospective study.	Cardiovasc Diabetol. 2016	27912784		1	0		-	-	-	-		PubMed	0	0
Intensification of IDegAsp Twice Daily (Adding Insulin Aspart vs. Switching To Basal-Bolus): Exploratory Randomized Trial in Type 2 Diabetes.	Diabetes Ther. 2017	27853981		1	0		-	-	-	-		PubMed	0	0
Efficacy and safety of empagliflozin in type 2 diabetes mellitus: a meta-analysis of randomized controlled trials.	Postgrad Med. 2017	27841714		1	0		-	-	-	-		PubMed	0	0
Liraglutide improves cardiac function in patients with type 2 diabetes and chronic heart failure.	Endocrine. 2017	27830456		1	0		-	-	-	-		PubMed	0	0
Sitagliptin and Risk of Heart Failure in Patients With Type 2 Diabetes: A Meta-Analysis.	JACC Heart Fail. 2016	27810084		1	0		-	-	-	-		PubMed	0	0
Type 2 diabetes and cardiovascular disease: A metabolic overview of recent clinical trials.	J Diabetes Complications. 2017	27780670		1	0		-	-	-	-		PubMed	0	0
Reduction of Sulfonylurea with the Initiation of Basal Insulin in Patients with Inadequately Controlled Type 2 Diabetes Mellitus Undergoing Long-Term Sulfonylurea-Based Treatment.	Diabetes Metab J. 2016	27766795		1	0		-	-	-	-		PubMed	0	0
The place of DPP-4 inhibitors in the treatment algorithm of diabetes type 2: a systematic review of cost-effectiveness studies.	Eur J Health Econ. 2017	27752788		1	0		-	-	-	-		PubMed	0	0
A randomized clinical trial of basal insulin peglispro vs NPH in insulin-naÃ¯ve patients with type 2 diabetes: the IMAGINE 6 trial.	Diabetes Obes Metab. 2016	27723225		1	0		-	-	-	-		PubMed	0	0
Achieve control: a pragmatic clinical trial of insulin glargine 300 U/mL versus other basal insulins in insulin-naÃ¯ve patients with type 2 diabetes.	Postgrad Med. 2016	27690710		1	0		-	-	-	-		PubMed	0	0
Short- and Long-Term Effects of Wholegrain Oat Intake on Weight Management and Glucolipid Metabolism in Overweight Type-2 Diabetics: A Randomized Control Trial.	Nutrients. 2016	27618090		1	0		-	-	-	-		PubMed	0	0
Walking Away from Type 2 diabetes: a cluster randomized controlled trial.	Diabet Med. 2017	27589017		1	0		-	-	-	-		PubMed	0	0
Randomized, Double-Blinded, Double-Dummy, Active-Controlled, and Multiple-Dose Clinical Study Comparing the Efficacy and Safety of Mulberry Twig (Ramulus Mori, Sangzhi) Alkaloid Tablet and Acarbose in Individuals with Type 2 Diabetes Mellitus.	Evid Based Complement Alternat Med. 2016	27547230		1	0		-	-	-	-		PubMed	0	0
Haptoglobin 2-2 genotype and the risk of coronary artery disease in the Diabetes Control and Complications Trial/Epidemiology of Diabetes Interventions and Complications study (DCCT/EDIC).	J Diabetes Complications. 2016	27539884		1	0		-	-	-	-		PubMed	0	0
The Effect of Regular Exercise on Insulin Sensitivity in Type 2 Diabetes Mellitus: A Systematic Review and Meta-Analysis.	Diabetes Metab J. 2016	27535644		1	0		-	-	-	-		PubMed	0	0
Effect of glucagon-like peptide-1 on major cardiovascular outcomes in patients with type 2 diabetes mellitus: A meta-analysis of randomized controlled trials.	Int J Cardiol. 2016	27526367		1	0		-	-	-	-		PubMed	0	0
Reduced nocturnal hypoglycaemia with basal insulin peglispro compared with insulin glargine: pooled analyses of five randomized controlled trials.	Diabetes Obes Metab. 2016	27484021		1	0		-	-	-	-		PubMed	0	0
Metabolic Effects of Monounsaturated Fatty Acid-Enriched Diets Compared With Carbohydrate or Polyunsaturated Fatty Acid-Enriched Diets in Patients With Type 2 Diabetes: A Systematic Review and Meta-analysis of Randomized Controlled Trials.	Diabetes Care. 2016	27457635		1	0		-	-	-	-		PubMed	0	0
Efficacy and Safety of Multiple Doses of Exenatide Once-Monthly Suspension in Patients With Type 2 Diabetes: A Phase II Randomized Clinical Trial.	Diabetes Care. 2016	27436275		1	0		-	-	-	-		PubMed	0	0
Mediterranean diet for type 2 diabetes: cardiometabolic benefits.	Endocrine. 2017	27395419		1	0		-	-	-	-		PubMed	0	0
Canagliflozin provides greater attainment of both HbA1c and body weight reduction versus sitagliptin in patients with type 2 diabetes.	Postgrad Med. 2016	27391951		1	0		-	-	-	-		PubMed	0	0
Basal insulin peglispro versus insulin glargine in insulin-naÃ¯ve type 2 diabetes: IMAGINE 2 randomized trial.	Diabetes Obes Metab. 2016	27349219		1	0		-	-	-	-		PubMed	0	0
Efficacy of canagliflozin combined with antidiabetic drugs in treating typeÂ 2 diabetes mellitus: Meta-analysis of randomized control trials.	J Diabetes Investig. 2016	27330722		1	0		-	-	-	-		PubMed	0	0
Empagliflozin for Type 2 Diabetes Mellitus: An Overview of Phase 3 Clinical Trials.	Curr Diabetes Rev. 2017	27296042		1	0		-	-	-	-		PubMed	0	0
The effect of Astragalus as an adjuvant treatment in type 2 diabetes mellitus: A (preliminary) meta-analysis.	J Ethnopharmacol. 2016	27269392		1	0		-	-	-	-		PubMed	0	0
Efficacy and safety of coadministration of sitagliptin with insulin glargine in type 2 diabetes.	J Diabetes. 2017	27255431		1	0		-	-	-	-		PubMed	0	0
Randomized double-blind clinical trial comparing basal insulin peglispro and insulin glargine, in combination with prandial insulin lispro, in patients with type 2 diabetes: IMAGINE 4.	Diabetes Obes Metab. 2016	27234693		1	0		-	-	-	-		PubMed	0	0
Efficacy and safety of sitagliptin/metformin fixed-dose combination compared with glimepiride in patients with type 2 diabetes: A multicenter randomized double-blind study.	J Diabetes. 2017	27229178		1	0		-	-	-	-		PubMed	0	0
Once-daily delayed-release metformin lowers plasma glucose and enhances fasting and postprandial GLP-1 and PYY: results from two randomised trials.	Diabetologia. 2016	27216492		1	0		-	-	-	-		PubMed	0	0
Glucose Variability in a 26-Week Randomized Comparison of Mealtime Treatment With Rapid-Acting Insulin Versus GLP-1 Agonist in Participants With Type 2 Diabetes at High Cardiovascular Risk.	Diabetes Care. 2016	27208320		1	0		-	-	-	-		PubMed	0	0
Premixed Insulin Lispro Versus Insulin Glargine In Type 2 Diabetes: A Meta-Analysis.	Value Health. 2014	27202668		1	0		-	-	-	-		PubMed	0	0
A Systematic Review and Network Meta-Analysis Assessing the Effectiveness and Tolerability of Gliptins and Sulfonylureas as Monotherapy in Patients with Type 2 Diabetes Mellitus If Metformin is not Considered Appropriate.	Value Health. 2014	27200582		1	0		-	-	-	-		PubMed	0	0
Major adverse cardiovascular events with basal insulin peglispro versus comparator insulins in patients with type 1 or type 2 diabetes: a meta-analysis.	Cardiovasc Diabetol. 2016	27188479		1	0		-	-	-	-		PubMed	0	0
The efficacy and safety of teneligliptin added to ongoing metformin monotherapy in patients with type 2 diabetes: a randomized study with open label extension.	Expert Opin Pharmacother. 2016	27181910		1	0		-	-	-	-		PubMed	0	0
Ischemic cardiac outcomes and hospitalizations according to prior macrovascular disease status in patients with type 2 diabetes and recent acute coronary syndrome from the Examination of Cardiovascular Outcomes with Alogliptin versus Standard of Care trial.	Am Heart J. 2016	27179720		1	0		-	-	-	-		PubMed	0	0
Severe hypoglycemia in the Look AHEAD Trial.	J Diabetes Complications. 2016	27114389		1	0		-	-	-	-		PubMed	0	0
Safety and Tolerability of Empagliflozin in Patients with Type 2 Diabetes.	Clin Ther. 2016	27085585		1	0		-	-	-	-		PubMed	0	0
Role of yoga for patients with type II diabetes mellitus: A systematic review and meta-analysis.	Complement Ther Med. 2016	27062957		1	0		-	-	-	-		PubMed	0	0
Risk of heart failure with dipeptidyl peptidase-4 inhibitors in patients with type 2 diabetes mellitus: A meta-analysis of randomized controlled trials.	Int J Cardiol. 2016	27043061		1	0		-	-	-	-		PubMed	0	0
Effects of sodium-glucose cotransporter-2 inhibitors on cardiovascular events, death, and major safety outcomes in adults with type 2 diabetes: a systematic review and meta-analysis.	Lancet Diabetes Endocrinol. 2016	27009625		1	0		-	-	-	-		PubMed	0	0
Relationship between weight change and glycaemic control in patients with type 2 diabetes receiving once-weekly dulaglutide treatment.	Diabetes Obes Metab. 2016	26969812		1	0		-	-	-	-		PubMed	0	0
The placebo response of injectable GLP-1 receptor agonists vs. oral DPP-4 inhibitors and SGLT-2 inhibitors: a systematic review and meta-analysis.	Br J Clin Pharmacol. 2016	26935973		1	0		-	-	-	-		PubMed	0	0
Metformin versus placebo in combination with insulin analogues in patients with type 2 diabetes mellitus-the randomised, blinded Copenhagen Insulin and Metformin Therapy (CIMT) trial.	BMJ Open. 2016	26916684		1	0		-	-	-	-		PubMed	0	0
Network meta-analysis accurately predicted the outcome of a subsequent randomised trial comparing once weekly dulaglutide 1.5 mg and once daily liraglutide 1.8 mg.	Int J Clin Pract. 2016	26916354		1	0		-	-	-	-		PubMed	0	0
The Efficacy of Ginseng-Related Therapies in Type 2 Diabetes Mellitus: An Updated Systematic Review and Meta-analysis.	Medicine (Baltimore). 2016	26871778		1	0		-	-	-	-		PubMed	0	0
Mediterranean diet cools down the inflammatory milieu in type 2 diabetes: the MÃ‰DITA randomized controlled trial.	Endocrine. 2016	26860514		1	0		-	-	-	-		PubMed	0	0
The difference between oats and beta-glucan extract intake in the management of HbA1c, fasting glucose and insulin sensitivity: a meta-analysis of randomized controlled trials.	Food Funct. 2016	26840185		1	0		-	-	-	-		PubMed	0	0
Effects on All-cause Mortality and Cardiovascular Outcomes in Patients With Type 2 Diabetes by Comparing Insulin With Oral Hypoglycemic Agent Therapy: A Meta-analysis of Randomized Controlled Trials.	Clin Ther. 2016	26774276		1	0		-	-	-	-		PubMed	0	0
GLP-1 RAs as compared to prandial insulin after failure of basal insulin in type 2 diabetes: lessons from the 4B and Get-Goal DUO 2 trials.	Diabetes Metab. 2015	26774015		1	0		-	-	-	-		PubMed	0	0
Once-daily liraglutide (1.2 mg) compared with twice-daily exenatide (10 Î¼g) in the treatment of type 2 diabetes patients: An indirect treatment comparison meta-analysis.	J Diabetes. 2016	26729046		1	0		-	-	-	-		PubMed	0	0
TREATMENT INTENSIFICATION WITH INSULIN DEGLUDEC/INSULIN ASPART TWICE DAILY: RANDOMIZED STUDY TO COMPARE SIMPLE AND STEP-WISE TITRATION ALGORITHMS.	Endocr Pract. 2016	26720250		1	0		-	-	-	-		PubMed	0	0
Systematic review and meta-analysis of efficacy and safety of combinational therapy with metformin and dipeptidyl peptidase-4 inhibitors.	Saudi Pharm J. 2015	26702254		1	0		-	-	-	-		PubMed	0	0
The Metabolic Effects of Oats Intake in Patients with Type 2 Diabetes: A Systematic Review and Meta-Analysis.	Nutrients. 2015	26690472		1	0		-	-	-	-		PubMed	0	0
Improvement in glycated haemoglobin evaluated by baseline body mass index: a meta-analysis of the liraglutide phase III clinical trial programme.	Diabetes Obes Metab. 2016	26662611		1	0		-	-	-	-		PubMed	0	0
Combination therapy in type 2 diabetes mellitus: adding empagliflozin to basal insulin.	Drugs Context. 2015	26633984		1	0		-	-	-	-		PubMed	0	0
Randomized Clinical Trial Comparing Basal Insulin Peglispro and Insulin Glargine in Patients With Type 2 Diabetes Previously Treated With Basal Insulin: IMAGINE 5.	Diabetes Care. 2016	26577417		1	0		-	-	-	-		PubMed	0	0
Glycemic load, exercise, and monitoring blood glucose (GEM): A paradigm shift in the treatment of type 2 diabetes mellitus.	Diabetes Res Clin Pract. 2016	26556234		1	0		-	-	-	-		PubMed	0	0
Durable efficacy of liraglutide in patients with type 2 diabetes and pronounced insulin-associated weight gain: 52-week results from the Effect of Liraglutide on insulin-associated wEight GAiN in patients with Type 2 diabetes' (ELEGANT) randomized controlled trial.	J Intern Med. 2016	26553486		1	0		-	-	-	-		PubMed	0	0
Multivariate Network Meta-Analysis: An Example In Type 2 Diabetes For The Analysis Of Glycaemic Control.	Value Health. 2015	26533853		1	0		-	-	-	-		PubMed	0	0
A Network Meta-Analysis (NMA) to Assess the Longer-Term Relative Efficacy of Canagliflozin in Patients with Type 2 Diabetes Inadequately Controlled on Metformin.	Value Health. 2015	26533361		1	0		-	-	-	-		PubMed	0	0
Bayesian Network Meta-Analysis (NMA) to Assess the Relative Efficacy of Canagliflozin in Patients with Type 2 Diabetes Mellitus (T2DM) Inadequately Controlled with Insulin.	Value Health. 2015	26533360		1	0		-	-	-	-		PubMed	0	0
Network Meta-Analysis (NMA) to Assess Relative Efficacy Measured as Percentage of Patients Treated to HbA1c Target with Canagliflozin in Patients with Type 2 Diabetes Mellitus (T2DM) Inadequately Controlled on Metformin and Sulphonylurea (MET+SU).	Value Health. 2015	26533357		1	0		-	-	-	-		PubMed	0	0
Exenatide Once Weekly Plus Metformin for the Treatment of Type 2 Diabetes Mellitus: A Network Meta-Analysis of Randomised Controlled Trials.	Value Health. 2015	26533352		1	0		-	-	-	-		PubMed	0	0
Open-label randomized non-inferiority trial of a fixed-dose combination of glimepiride and atorvastatin for the treatment of people whose Type 2 diabetes is uncontrolled on metformin.	Diabet Med. 2016	26484794		1	0		-	-	-	-		PubMed	0	0
The effects of high-intensity interval training on glucose regulation and insulin resistance: a meta-analysis.	Obes Rev. 2015	26481101		1	0		-	-	-	-		PubMed	0	0
IDegLira Improves Both Fasting and Postprandial Glucose Control as Demonstrated Using Continuous Glucose Monitoring and a Standardized Meal Test.	J Diabetes Sci Technol. 2015	26443290		1	0		-	-	-	-		PubMed	0	0
Health Coaching Reduces HbA1c in Type 2 Diabetic Patients From a Lower-Socioeconomic Status Community: A Randomized Controlled Trial.	J Med Internet Res. 2015	26441467		1	0		-	-	-	-		PubMed	0	0
Factors associated with failure to achieve a glycated haemoglobin target of <8.0% in the Action to Control Cardiovascular Risk in Diabetes (ACCORD) trial.	Diabetes Obes Metab. 2016	26435375		1	0		-	-	-	-		PubMed	0	0
Treatment satisfaction in type 2 diabetes patients taking empagliflozin compared with patients taking glimepiride.	Qual Life Res. 2016	26424170		1	0		-	-	-	-		PubMed	0	0
HbA1c below 7% as the goal of glucose control fails to maximize the cardiovascular benefits: a meta-analysis.	Cardiovasc Diabetol. 2015	26392171		1	0		-	-	-	-		PubMed	0	0
Achievement of treatment goals with canagliflozin in patients with type 2 diabetes mellitus: a pooled analysis of randomized controlled trials.	Curr Med Res Opin. 2015	26373629		1	0		-	-	-	-		PubMed	0	0
Efficacy and safety of sodium-glucose cotransporter 2 inhibitors in type 2 diabetes: a meta-analysis of randomized controlled trials for 1 to 2years.	J Diabetes Complications. 2015	26365905		1	0		-	-	-	-		PubMed	0	0
Patient preference and tolerability of a DPP-4 inhibitor versus a GLP-1 analog in patients with type 2 diabetes mellitus inadequately controlled with metformin: a 24-week, randomized, multicenter, crossover study.	Ther Adv Endocrinol Metab. 2015	26301063		1	0		-	-	-	-		PubMed	0	0
Efficacy and tolerability of canagliflozin as add-on to metformin in the treatment of type 2 diabetes mellitus: a meta-analysis.	Eur J Clin Pharmacol. 2015	26282731		1	0		-	-	-	-		PubMed	0	0
Insulin degludec results in lower rates of nocturnal hypoglycaemia and fasting plasma glucose vs. insulin glargine: A meta-analysis of seven clinical trials.	Nutr Metab Cardiovasc Dis. 2015	26232910		1	0		-	-	-	-		PubMed	0	0
The Impact of Chronic Liraglutide Therapy on Glucagon Secretion in Type 2 Diabetes: Insight From the LIBRA Trial.	J Clin Endocrinol Metab. 2015	26230296		1	0		-	-	-	-		PubMed	0	0
Once-weekly glucagon-like peptide-1 receptor agonist dulaglutide is non-inferior to once-daily liraglutide and superior to placebo in Japanese patients with type 2 diabetes: a 26-week randomized phase III study.	Diabetes Obes Metab. 2015	26179187		1	0		-	-	-	-		PubMed	0	0
Three-Year Outcomes of Bariatric Surgery vs Lifestyle Intervention for Type 2 Diabetes Mellitus Treatment: A Randomized Clinical Trial.	JAMA Surg. 2015	26132586		1	0		-	-	-	-		PubMed	0	0
PRomotion Of Physical activity through structured Education with differing Levels of ongoing Support for people at high risk of type 2 diabetes (PROPELS): study protocol for a randomized controlled trial.	Trials. 2015	26130075		1	0		-	-	-	-		PubMed	0	0
The Effect of Glucagon-Like Peptide 1 Receptor Agonists on Weight Loss in Type 2 Diabetes: A Systematic Review and Mixed Treatment Comparison Meta-Analysis.	PLoS One. 2015	26121478		1	0		-	-	-	-		PubMed	0	0
PATIENTS ACHIEVING GOOD GLYCEMIC CONTROL (HBA1c <7%) EXPERIENCE A LOWER RATE OF HYPOGLYCEMIA WITH INSULIN DEGLUDEC THAN WITH INSULIN GLARGINE: A META-ANALYSIS OF PHASE 3A TRIALS.	Endocr Pract. 2015	26121451		1	0		-	-	-	-		PubMed	0	0
Treatment satisfaction in people with type 2 diabetes mellitus treated with once-weekly dulaglutide: data from the AWARD-1 and AWARD-3 clinical trials.	Diabetes Obes Metab. 2015	26095190		1	0		-	-	-	-		PubMed	0	0
Medical school-based teaching kitchen improves HbA1c, blood pressure, and cholesterol for patients with type 2 diabetes: Results from a novel randomized controlled trial.	Diabetes Res Clin Pract. 2015	26002686		1	0		-	-	-	-		PubMed	0	0
Going mobile with diabetes support: a randomized study of a text message-based personalized behavioral intervention for type 2 diabetes self-care.	Diabetes Spectr. 2015	25987806		1	0		-	-	-	-		PubMed	0	0
Patient-level meta-analysis of the EDITION 1, 2 and 3 studies: glycaemic control and hypoglycaemia with new insulin glargine 300 U/ml versus glargine 100 U/ml in people with type 2 diabetes.	Diabetes Obes Metab. 2015	25929311		1	0		-	-	-	-		PubMed	0	0
Combination therapy for patients with uncontrolled type 2 diabetes mellitus: adding empagliflozin to pioglitazone or pioglitazone plus metformin.	Expert Opin Drug Saf. 2015	25789798		1	0		-	-	-	-		PubMed	0	0
Improvement in medication adherence and self-management of diabetes with a clinical pharmacy program: a randomized controlled trial in patients with type 2 diabetes undergoing insulin therapy at a teaching hospital.	Clinics (Sao Paulo). 2015	25789518		1	0		-	-	-	-		PubMed	0	0
Efficacy and safety of sitagliptin compared with sulfonylurea therapy in patients with type 2 diabetes showing inadequately controlled glycosylated hemoglobin with metformin monotherapy: A meta-analysis.	Exp Ther Med. 2015	25780464		1	0		-	-	-	-		PubMed	0	0
Five-year efficacy and safety data of exenatide once weekly: long-term results from the DURATION-1 randomized clinical trial.	Mayo Clin Proc. 2015	25744115		1	0		-	-	-	-		PubMed	0	0
A nomogram to estimate the HbA1c response to different DPP-4 inhibitors in type 2 diabetes: a systematic review and meta-analysis of 98 trials with 24â€…163 patients.	BMJ Open. 2015	25687897		1	0		-	-	-	-		PubMed	0	0
Effectiveness and safety of glimepiride and iDPP4, associated with metformin in second line pharmacotherapy of type 2 diabetes mellitus: systematic review and meta-analysis.	Int J Clin Pract. 2015	25683794		1	0		-	-	-	-		PubMed	0	0
A randomized controlled trial of liraglutide versus insulin detemir plus sitagliptin: Effective switch from intensive insulin therapy to the once-daily injection in patients with well-controlled type 2 diabetes.	J Clin Pharmacol. 2015	25677642		1	0		-	-	-	-		PubMed	0	0
Empagliflozin added to metformin and sulfonylurea therapy in patients with sub-optimally controlled type 2 diabetes mellitus.	Expert Opin Pharmacother. 2015	25644093		1	0		-	-	-	-		PubMed	0	0
New insulin glargine 300 U/ml compared with glargine 100 U/ml in insulin-naÃ¯ve people with type 2 diabetes on oral glucose-lowering drugs: a randomized controlled trial (EDITION 3).	Diabetes Obes Metab. 2015	25641260		1	0		-	-	-	-		PubMed	0	0
Remission of recently diagnosed type 2 diabetes mellitus with weight loss and exercise.	J Cardiopulm Rehabil Prev. 2015	25636149		1	0		-	-	-	-		PubMed	0	0
Systematic review and meta-analysis of randomized clinical trials comparing efficacy and safety outcomes of insulin glargine with NPH insulin, premixed insulin preparations or with insulin detemir in type 2 diabetes mellitus.	Acta Diabetol. 2015	25585592		1	0		-	-	-	-		PubMed	0	0
Lobeglitazone and pioglitazone as add-ons to metformin for patients with type 2 diabetes: a 24-week, multicentre, randomized, double-blind, parallel-group, active-controlled, phase III clinical trial with a 28-week extension.	Diabetes Obes Metab. 2015	25580775		1	0		-	-	-	-		PubMed	0	0
Nurse-led behavioral management of diabetes and hypertension in community practices: a randomized trial.	J Gen Intern Med. 2015	25567758		1	0		-	-	-	-		PubMed	0	0
Anagliptin and sitagliptin as add-ons to metformin for patients with type 2 diabetes: a 24-week, multicentre, randomized, double-blind, active-controlled, phase III clinical trial with a 28-week extension.	Diabetes Obes Metab. 2015	25523633		1	0		-	-	-	-		PubMed	0	0
Practice context affects efforts to improve diabetes care for primary care patients: a pragmatic cluster randomized trial.	J Gen Intern Med. 2015	25472509		1	0		-	-	-	-		PubMed	0	0
Efficacy of vildagliptin and sitagliptin in lowering fasting plasma glucose: Results of a randomized controlled trial.	Diabetes Metab. 2015	25457473		1	0		-	-	-	-		PubMed	0	0
Regardless of the degree of glycaemic control, linagliptin has lower hypoglycaemia risk than all doses of glimepiride, at all time points, over the course of a 2-year trial.	Diabetes Obes Metab. 2015	25425502		1	0		-	-	-	-		PubMed	0	0
Risk of diarrhea in patients with type 2 diabetes mellitus treated with sitagliptin: a meta-analysis of 30 randomized clinical trials.	Drug Des Devel Ther. 2014	25419118		1	0		-	-	-	-		PubMed	0	0
Saxagliptin efficacy and safety in patients with type 2 diabetes mellitus stratified by cardiovascular disease history and cardiovascular risk factors: analysis of 3 clinical trials.	Postgrad Med. 2014	25414932		1	0		-	-	-	-		PubMed	0	0
Efficacy and safety of nateglinide plus vildagliptin combination therapy compared with switching to vildagliptin in type 2 diabetes patients inadequately controlled with nateglinide.	J Diabetes Investig. 2014	25411599		1	0		-	-	-	-		PubMed	0	0
Liraglutide for the treatment of type 2 diabetes mellitus: a meta-analysis of randomized placebo-controlled trials.	Adv Ther. 2014	25388240		1	0		-	-	-	-		PubMed	0	0
Gastrointestinal adverse events of glucagon-like peptide-1 receptor agonists in patients with type 2 diabetes: a systematic review and network meta-analysis.	Diabetes Technol Ther. 2015	25375397		1	0		-	-	-	-		PubMed	0	0
Insulin Lispro with Continuous Subcutaneous Insulin Infusion is Safe and Effective in Patients with Type 2 Diabetes: A Randomized Crossover Trial of Insulin Lispro Versus Insulin Aspart.	Endocr Pract. 2015	25370322		1	0		-	-	-	-		PubMed	0	0
Patient-led versus physician-led titration of insulin glargine in patients with uncontrolled type 2 diabetes: a randomized multinational ATLAS study.	Endocr Pract. 2015	25297660		1	0		-	-	-	-		PubMed	0	0
Liraglutide and the preservation of pancreatic Î²-cell function in early type 2 diabetes: the LIBRA trial.	Diabetes Care. 2014	25249651		1	0		-	-	-	-		PubMed	0	0
Efficacy and safety of linagliptin as monotherapy or add-on treatment in Asian patients with suboptimal glycemic control: a pooled analysis.	Curr Med Res Opin. 2015	25215428		1	0		-	-	-	-		PubMed	0	0
Randomized pilot trial of bariatric surgery versus intensive medical weight management on diabetes remission in type 2 diabetic patients who do NOT meet NIH criteria for surgery and the role of soluble RAGE as a novel biomarker of success.	Ann Surg. 2014	25203878		1	0		-	-	-	-		PubMed	0	0
Efficacy and safety of basal insulin glargine 12 and 24 weeks after initiation in persons with type 2 diabetes: a pooled analysis of data from treatment arms of 15 treat-to-target randomised controlled trials.	Diabetes Res Clin Pract. 2014	25195151		1	0		-	-	-	-		PubMed	0	0
New insulin glargine 300 units/mL versus glargine 100 units/mL in people with type 2 diabetes using oral agents and basal insulin: glucose control and hypoglycemia in a 6-month randomized controlled trial (EDITION 2).	Diabetes Care. 2014	25193531		1	0		-	-	-	-		PubMed	0	0
Canagliflozin in Asian patients with type 2 diabetes on metformin alone or metformin in combination with sulphonylurea.	Diabetes Obes Metab. 2015	25175734		1	0		-	-	-	-		PubMed	0	0
Neutral impact on systolic and diastolic cardiac function of 2 years of intensified multi-intervention in type 2 diabetes: the randomized controlled Asker and BÃ¦rum Cardiovascular Diabetes (ABCD) study.	Am Heart J. 2014	25173538		1	0		-	-	-	-		PubMed	0	0
Saxagliptin efficacy and safety in patients with type 2 diabetes receiving concomitant statin therapy.	J Diabetes Complications. 2014	25168266		1	0		-	-	-	-		PubMed	0	0
Impact of a community health workers-led structured program on blood glucose control among latinos with type 2 diabetes: the DIALBEST trial.	Diabetes Care. 2015	25125508		1	0		-	-	-	-		PubMed	0	0
Efficacy and safety of canagliflozin in subjects with type 2 diabetes: systematic review and meta-analysis.	Eur J Clin Pharmacol. 2014	25124541		1	0		-	-	-	-		PubMed	0	0
Assessment of the relative effectiveness and tolerability of treatments of type 2 diabetes mellitus: a network meta-analysis.	Clin Ther. 2014	25109773		1	0		-	-	-	-		PubMed	0	0
Effects of intensive glycaemic control on ischaemic heart disease: analysis of data from the randomised, controlled ACCORD trial.	Lancet. 2014	25088437		1	0		-	-	-	-		PubMed	0	0
Insulin degludec versus insulin glargine in type 1 and type 2 diabetes mellitus: a meta-analysis of endpoints in phase 3a trials.	Diabetes Ther. 2014	25081590		1	0		-	-	-	-		PubMed	0	0
New insulin glargine 300 units/mL versus glargine 100 units/mL in people with type 2 diabetes using basal and mealtime insulin: glucose control and hypoglycemia in a 6-month randomized controlled trial (EDITION 1).	Diabetes Care. 2014	25078900		1	0		-	-	-	-		PubMed	0	0
Glucagon-like peptide 1 receptor agonist therapy is more efficacious than insulin glargine for poorly controlled type 2 diabetes: A systematic review and meta-analysis.	J Diabetes. 2015	25047138		1	0		-	-	-	-		PubMed	0	0
A systematic review and mixed-treatment comparison of dapagliflozin with existing anti-diabetes treatments for those with type 2 diabetes mellitus inadequately controlled by sulfonylurea monotherapy.	Diabetol Metab Syndr. 2014	25006351		1	0		-	-	-	-		PubMed	0	0
Liraglutide reverses pronounced insulin-associated weight gain, improves glycaemic control and decreases insulin dose in patients with type 2 diabetes: a 26 week, randomised clinical trial (ELEGANT).	Diabetologia. 2014	24947583		1	0		-	-	-	-		PubMed	0	0
A 24-week, prospective, randomized, open-label, treat-to-target pilot study of obese type 2 diabetes patients with severe insulin resistance to assess the addition of exenatide on the efficacy of u-500 regular insulin plus metformin.	Endocr Pract. 2014	24936555		1	0		-	-	-	-		PubMed	0	0
Clinical effectiveness of NovolinÂ® 30R versus LantusÂ® combined with GlucobayÂ® treatment in elderly patients with type 2 diabetes mellitus controlled by oral hypoglycaemic agents: A randomized study.	J Int Med Res. 2014	24925584		1	0		-	-	-	-		PubMed	0	0
Greater fear of hypoglycaemia with premixed insulin than with basal-bolus insulin glargine and glulisine: patient-reported outcomes from a 60-week randomised study.	Diabetes Obes Metab. 2014	24919603		1	0		-	-	-	-		PubMed	0	0
Safety and tolerability of canagliflozin in patients with type 2 diabetes mellitus: pooled analysis of phase 3 study results.	Postgrad Med. 2014	24918789		1	0		-	-	-	-		PubMed	0	0
Surgical vs medical treatments for type 2 diabetes mellitus: a randomized clinical trial.	JAMA Surg. 2014	24899268		1	0		-	-	-	-		PubMed	0	0
Vildagliptin compared to glimepiride on post-prandial lipemia and on insulin resistance in type 2 diabetic patients.	Metabolism. 2014	24874591		1	0		-	-	-	-		PubMed	0	0
The dipeptidyl peptidase-4 inhibitor linagliptin lowers postprandial glucose and improves measures of Î²-cell function in type 2 diabetes.	Diabetes Obes Metab. 2014	24821586		1	0		-	-	-	-		PubMed	0	0
Profound defects in Î²-cell function in screen-detected type 2 diabetes are not improved with glucose-lowering treatment in the Early Diabetes Intervention Program (EDIP).	Diabetes Metab Res Rev. 2014	24819707		1	0		-	-	-	-		PubMed	0	0
Testing the therapeutic equivalence of alogliptin, linagliptin, saxagliptin, sitagliptin or vildagliptin as monotherapy or in combination with metformin in patients with type 2 diabetes.	Diabetes Ther. 2014	24793219		1	0		-	-	-	-		PubMed	0	0
Efficacy and safety of empagliflozin for type 2 diabetes: a systematic review and meta-analysis.	Diabetes Obes Metab. 2014	24766495		1	0		-	-	-	-		PubMed	0	0
Multiple behaviour change intervention and outcomes in recently diagnosed type 2 diabetes: the ADDITION-Plus randomised controlled trial.	Diabetologia. 2014	24759957		1	0		-	-	-	-		PubMed	0	0
Influence of vitamin E supplementation on glycaemic control: a meta-analysis of randomised controlled trials.	PLoS One. 2014	24740143		1	0		-	-	-	-		PubMed	0	0
OpT2mise: a randomized controlled trial to compare insulin pump therapy with multiple daily injections in the treatment of type 2 diabetes-research design and methods.	Diabetes Technol Ther. 2014	24735134		1	0		-	-	-	-		PubMed	0	0
Use of Vildagliptin in Management of Type 2 Diabetes: Effectiveness, Treatment Persistence and Safety from the 2-Year Real-Life VILDA Study.	Diabetes Ther. 2014	24729158		1	0		-	-	-	-		PubMed	0	0
The SGLT2 Inhibitor Empagliflozin for the Treatment of Type 2 Diabetes Mellitus: a Bench to Bedside Review.	Diabetes Ther. 2014	24729157		1	0		-	-	-	-		PubMed	0	0
Empagliflozin as add-on to metformin in patients with type 2 diabetes: a 24-week, randomized, double-blind, placebo-controlled trial.	Diabetes Care. 2014	24722494		1	0		-	-	-	-		PubMed	0	0
Use of an insulin bolus advisor facilitates earlier and more frequent changes in insulin therapy parameters in suboptimally controlled patients with diabetes treated with multiple daily insulin injection therapy: results of the ABACUS trial.	Diabetes Technol Ther. 2014	24716820		1	0		-	-	-	-		PubMed	0	0
Treatment of mild and moderate type-2 diabetes: open prospective trial with Hintonia latiflora extract.	Eur J Med Res. 2014	24678614		1	0		-	-	-	-		PubMed	0	0
Living well with diabetes: 24-month outcomes from a randomized trial of telephone-delivered weight loss and physical activity intervention to improve glycemic control.	Diabetes Care. 2014	24658390		1	0		-	-	-	-		PubMed	0	0
Comparison between the therapeutic effect of metformin, glimepiride and their combination as an add-on treatment to insulin glargine in uncontrolled patients with type 2 diabetes.	PLoS One. 2014	24614911		1	0		-	-	-	-		PubMed	0	0
The effect of addition of liraglutide to high-dose intensive insulin therapy: a randomized prospective trial.	Diabetes Obes Metab. 2014	24589127		1	0		-	-	-	-		PubMed	0	0
Intensive therapy in newly diagnosed type 2 diabetes: results of a 6-year randomized trial.	J Investig Med. 2014	24569485		1	0		-	-	-	-		PubMed	0	0
Starting glargine in insulin-naÃ¯ve type 2 diabetic patients based on body mass index is safe.	World J Diabetes. 2014	24567803		1	0		-	-	-	-		PubMed	0	0
A randomized controlled trial of the efficacy and safety of twice-daily saxagliptin plus metformin combination therapy in patients with type 2 diabetes and inadequate glycemic control on metformin monotherapy.	BMC Endocr Disord. 2014	24565221		1	0		-	-	-	-		PubMed	0	0
Reductions in systolic blood pressure with liraglutide in patients with type 2 diabetes: insights from a patient-level pooled analysis of six randomized clinical trials.	J Diabetes Complications. 2014	24561125		1	0		-	-	-	-		PubMed	0	0
Liraglutide decreases carotid intima-media thickness in patients with type 2 diabetes: 8-month prospective pilot study.	Cardiovasc Diabetol. 2014	24559258		1	0		-	-	-	-		PubMed	0	0
Motivational interventions in the management of HbA1c levels: a systematic review and meta-analysis.	Prim Care Diabetes. 2014	24525286		1	0		-	-	-	-		PubMed	0	0
Health status and hypoglycaemia with insulin degludec versus insulin glargine: a 2-year trial in insulin-naÃ¯ve patients with type 2 diabetes.	Diabetes Obes Metab. 2014	24495158		1	0		-	-	-	-		PubMed	0	0
Adding glimepiride to insulin+metformin in type 2 diabetes of more than 10 years' duration--a randomised, double-blind, placebo-controlled, cross-over study.	Diabetes Res Clin Pract. 2014	24485398		1	0		-	-	-	-		PubMed	0	0
A systematic review and meta-analysis of the efficacy of lixisenatide in the treatment of patients with type 2 diabetes.	Diabetes Obes Metab. 2014	24476092		1	0		-	-	-	-		PubMed	0	0
Safety of canagliflozin in patients with type 2 diabetes.	Curr Drug Saf. 2014	24446889		1	0		-	-	-	-		PubMed	0	0
The glucose and lipid effects of colesevelam as monotherapy in drug-naÃ¯ve type 2 diabetes.	Horm Metab Res. 2014	24356792		1	0		-	-	-	-		PubMed	0	0
Efficacy and safety of sodium glucose co-transport-2 inhibitors in type 2 diabetes: a meta-analysis of randomized clinical trials.	Diabetes Obes Metab. 2014	24320621		1	0		-	-	-	-		PubMed	0	0
Reduced risk of hypoglycemia with insulin degludec versus insulin glargine in patients with type 2 diabetes requiring high doses of basal insulin: a meta-analysis of 5 randomized begin trials.	Endocr Pract. 2014	24246344		1	0		-	-	-	-		PubMed	0	0
The skeletal effects of pioglitazone in type 2 diabetes or impaired glucose tolerance: a randomized controlled trial.	Eur J Endocrinol. 2014	24217934		1	0		-	-	-	-		PubMed	0	0
Metformin, but not rosiglitazone, attenuates the increasing plasma levels of a new cardiovascular marker, fibulin-1, in patients with type 2 diabetes.	Diabetes Care. 2014	24135389		1	0		-	-	-	-		PubMed	0	0
Dapagliflozin treatment for type 2 diabetes: a systematic review and meta-analysis of randomized controlled trials.	Diabetes Metab Res Rev. 2014	24115369		1	0		-	-	-	-		PubMed	0	0
Weight change upon once-daily initiation of insulin detemir with or without dietary intervention in overweight or obese insulin-naÃ¯ve individuals with type 2 diabetes: results from the DIET trial.	Diabetes Obes Metab. 2014	24112375		1	0		-	-	-	-		PubMed	0	0
Two diets with different haemoglobin A1c and antiglycaemic medication effects despite similar weight loss in type 2 diabetes.	Diabetes Obes Metab. 2014	23911112		1	0		-	-	-	-		PubMed	0	0
Starting bedtime glargine versus NPH insulin in poorly controlled type 2 diabetic patients with various hyperglycemia types (fasting type or postprandial type).	Acta Diabetol. 2014	23880900		1	0		-	-	-	-		PubMed	0	0
Effects of glucagon-like peptide-1 receptor agonists on cardiovascular risk: a meta-analysis of randomized clinical trials.	Diabetes Obes Metab. 2014	23829656		1	0		-	-	-	-		PubMed	0	0
Sitagliptin added to previously taken antidiabetic agents on insulin resistance and lipid profile: a 2-year study evaluation.	Fundam Clin Pharmacol. 2014	23039403		1	0		-	-	-	-		PubMed	0	0
Corrigendum: Effects on Subclinical Heart Failure in Type 2 Diabetic Subjects on Liraglutide Treatment vs. Glimepiride Both in Combination with Metformin: A Randomized Open Parallel-Group Study.	Front Endocrinol (Lausanne). 2018	29493662		0	-		-	-	-	-		PubMed	0	0
Liver Safety of Fasiglifam (TAK-875) in Patients with Type 2 Diabetes: Review of the Global Clinical Trial Experience.	Drug Saf. 2018	29492878		0	-		-	-	-	-		PubMed	0	0
Fibre supplementation for the prevention of type 2 diabetes and improvement of glucose metabolism: the randomised controlled Optimal Fibre Trial (OptiFiT).	Diabetologia. 2018	29492637		0	-		-	-	-	-		PubMed	0	0
Clozapine: Improvement of Negative Symptoms of Schizophrenia.	Cureus. 2017	29492362		0	-		-	-	-	-		PubMed	0	0
Dietary black-grained wheat intake improves glycemic control and inflammatory profile in patients with type 2 diabetes: a randomized controlled trial.	Ther Clin Risk Manag. 2018	29491712		0	-		-	-	-	-		PubMed	0	0
Vitamin D supplementation for improvement of chronic low-grade inflammation in patients with type 2 diabetes: a systematic review and meta-analysis of randomized controlled trials.	Nutr Rev. 2018	29490085		0	-		-	-	-	-		PubMed	0	0
Nut Consumption and Survival in Patients With Stage III Colon Cancer: Results From CALGB 89803 (Alliance).	J Clin Oncol. 2018	29489429		0	-		-	-	-	-		PubMed	0	0
Treatment with insulin is associated with worse outcome in patients with chronic heart failure and diabetes.	Eur J Heart Fail. 2018	29488676		0	-		-	-	-	-		PubMed	0	0
Empagliflozin Induces Transient Diuresis Without Changing Long-Term Overall Fluid Balance in Japanese Patients With Type 2 Diabetes.	Diabetes Ther. 2018	29488164		0	-		-	-	-	-		PubMed	0	0
Efficacy and Safety of GPR119 Agonist DS-8500a in Japanese Patients with Type 2 Diabetes: a Randomized, Double-Blind, Placebo-Controlled, 12-Week Study.	Adv Ther. 2018	29488152		0	-		-	-	-	-		PubMed	0	0
Effect of pioglitazone on cardiometabolic profiles and safety in patients with type 2 diabetes undergoing percutaneous coronary artery intervention: a prospective, multicenter, randomized trial.	Heart Vessels. 2018	29487991		0	-		-	-	-	-		PubMed	0	0
Effects of lipid-lowering agents on diabetic retinopathy: a Meta-analysis and systematic review.	Int J Ophthalmol. 2018	29487821		0	-		-	-	-	-		PubMed	0	0
The Effect of a Simulated Commercial Flight Environment with Hypoxia and Low Humidity on Clotting, Platelet, and Endothelial Function in Participants with Type 2 Diabetes - A Cross-over Study.	Front Endocrinol (Lausanne). 2018	29487564		0	-		-	-	-	-		PubMed	0	0
Risk Factors for Incident Diabetic Polyneuropathy in a Cohort With Screen-Detected Type 2 Diabetes Followed for 13 Years: ADDITION-Denmark.	Diabetes Care. 2018	29487078		0	-		-	-	-	-		PubMed	0	0
Improving cardiometabolic and mental health in women with gestational diabetes mellitus and their offspring: study protocol for MySweetHeart Trial, a randomised controlled trial.	BMJ Open. 2018	29487077		0	-		-	-	-	-		PubMed	0	0
A Novel Approach for Fully Automated, Personalized Health Coaching for Adults with Prediabetes: Pilot Clinical Trial.	J Med Internet Res. 2018	29487046		0	-		-	-	-	-		PubMed	0	0
Sodium-glucose cotransporter 2 inhibitors: potential cardiovascular and mortality benefits.	Cardiovasc Hematol Disord Drug Targets. 2018	29485012		0	-		-	-	-	-		PubMed	0	0
The effectiveness, reproducibility, and durability of tailored mobile coaching on diabetes management in policyholders: A randomized, controlled, open-label study.	Sci Rep. 2018	29483559		0	-		-	-	-	-		PubMed	0	0
Childhood BMI and Adult Type 2 Diabetes, Coronary Artery Diseases, Chronic Kidney Disease, and Cardiometabolic Traits: A Mendelian Randomization Analysis.	Diabetes Care. 2018	29483184		0	-		-	-	-	-		PubMed	0	0
SGLT2 inhibitors and renal outcomes in type 2 diabetes with or without renal impairment: A systematic review and meta-analysis.	Prim Care Diabetes. 2018	29482993		0	-		-	-	-	-		PubMed	0	0
Effects of nonsurgical periodontal treatment on glycated haemoglobin on type 2 diabetes patients (PARODIA 1 study): a randomized controlled trial in a sub-Saharan Africa population.	BMC Oral Health. 2018	29482543		0	-		-	-	-	-		PubMed	0	0
Comparison of glycemic control and Î²-cell function in new onset T2DM patients with PCOS of metformin and saxagliptin monotherapy or combination treatment.	BMC Endocr Disord. 2018	29482528		0	-		-	-	-	-		PubMed	0	0
JAK1/JAK2 inhibition by baricitinib in diabetic kidney disease: results from a Phase 2 randomized controlled clinical trial.	Nephrol Dial Transplant. 2018	29481660		0	-		-	-	-	-		PubMed	0	0
Diabetes and Blood Glucose Disorders Under Anti-PD1.	J Immunother. 2018	29481423		0	-		-	-	-	-		PubMed	0	0
Exenatide once weekly for smoking cessation: study protocol for a randomized clinical trial.	Medicine (Baltimore). 2018	29480848		0	-		-	-	-	-		PubMed	0	0
Efficacy and safety of American ginseng (Panax quinquefolius L.) extract on glycemic control and cardiovascular risk factors in individuals with type 2 diabetes: a double-blind, randomized, cross-over clinical trial.	Eur J Nutr. 2018	29478187		0	-		-	-	-	-		PubMed	0	0
Association of free-living physical activity measures with metabolic phenotypes in type 2 diabetes at the time of diagnosis. The Verona Newly Diagnosed Type 2 Diabetes Study (VNDS).	Nutr Metab Cardiovasc Dis. 2018	29477578		0	-		-	-	-	-		PubMed	0	0
Potential of Anthocyanin to Prevent Cardiovascular Disease in Diabetes.	Altern Ther Health Med. 2018	29477135		0	-		-	-	-	-		PubMed	0	0
Effective translation of a type-2 diabetes primary prevention programme into routine primary care: the PreDE cluster randomised clinical trial.	Diabetes Res Clin Pract. 2018	29476888		0	-		-	-	-	-		PubMed	0	0
Cigarette smoking and risk of albuminuria in patients with type 2 diabetes: a systematic review and meta-analysis ofÂ observational studies.	Int Urol Nephrol. 2018	29476432		0	-		-	-	-	-		PubMed	0	0
Insulin Matters: A Practical Approach to Basal Insulin Management in Type 2 Diabetes.	Diabetes Ther. 2018	29476414		0	-		-	-	-	-		PubMed	0	0
A weight loss intervention using a commercial mobile application in Latino Americans-Adelgaza Trial.	Transl Behav Med. 2018	29474702		0	-		-	-	-	-		PubMed	0	0
Predicting the Effect of Fenofibrate on Cardiovascular Risk for Individual Patients With Type 2 Diabetes Mellitus.	Diabetes Care. 2018	29472432		0	-		-	-	-	-		PubMed	0	0
The effectiveness of traditional Chinese medicine-based lifestyle interventions on biomedical, psychosocial, and behavioral outcomes in individuals with type 2 diabetes: A systematic review with meta-analysis.	Int J Nurs Stud. 2018	29471267		0	-		-	-	-	-		PubMed	0	0
High-intensity body weight training is comparable to combined training in changes in muscle mass, physical performance, inflammatory markers and metabolic health in postmenopausal women at high risk for type 2 diabetes mellitus: A randomized controlled clinical trial.	Exp Gerontol. 2018	29471132		0	-		-	-	-	-		PubMed	0	0
The safety of gliptins : updated data in 2018.	Expert Opin Drug Saf. 2018	29468916		0	-		-	-	-	-		PubMed	0	0
Real-World evaluation of Hba1c, blood pressure, and weight loss among patients with type 2 diabetes mellitus treated with canagliflozin: an analysis of electronic medical records from a network of hospitals in Florida.	Curr Med Res Opin. 2018	29468896		0	-		-	-	-	-		PubMed	0	0
Blood pressure lowering and anti-inflammatory effects of hesperidin in type 2 diabetes; a randomized double-blind controlled clinical trial.	Phytother Res. 2018	29468764		0	-		-	-	-	-		PubMed	0	0
Type 2 diabetes epidemic in East Asia: a 35-year systematic trend analysis.	Oncotarget. 2018	29467922		0	-		-	-	-	-		PubMed	0	0
A Clinical Decision Support System for Diabetic Retinopathy Screening: Creating a Clinical Support Application.	Telemed J E Health. 2018	29466097		0	-		-	-	-	-		PubMed	0	0
Cardiorespiratory parameters and glycated hemoglobin of patients with type 2 diabetes after a rehabilitation program.	Medicine (Baltimore). 2018	29465549		0	-		-	-	-	-		PubMed	0	0
A Randomized Controlled Trial of Short-term Toe Resistance Training to Improve Toe Pinch Force in Patients with Type 2 Diabetes.	Acta Med Okayama. 2018	29463933		0	-		-	-	-	-		PubMed	0	0
Nya glukossÃ¤nkande lÃ¤kemedel Ã¤r kardiovaskulÃ¤rt sÃ¤kra - Enstaka diabeteslÃ¤kemedel har Ã¤ven visats skydda mot kardiovaskulÃ¤ra och renala komplikationer.	Lakartidningen. 2018	29461566		0	-		-	-	-	-		PubMed	0	0
Dietary acid load and risk of type 2 diabetes: A systematic review and dose-response meta-analysis of prospective observational studies.	Clin Nutr ESPEN. 2018	29460782		0	-		-	-	-	-		PubMed	0	0
Heterogeneity of gestational diabetes (GDM) and long-term risk of diabetes and metabolic syndrome: findings from the RADIEL study follow-up.	Acta Diabetol. 2018	29460080		0	-		-	-	-	-		PubMed	0	0
Erythrocyte Glucose-6-Phosphate Dehydrogenase Level in Type 2 Diabetes Male.	Mymensingh Med J. 2018	29459599		0	-		-	-	-	-		PubMed	0	0
The family Coriobacteriaceae is a potential contributor to the beneficial effects of Roux-en-Y gastric bypass on type 2 diabetes.	Surg Obes Relat Dis. 2018	29459013		0	-		-	-	-	-		PubMed	0	0
Variability of fasting plasma glucose and the risk of painful diabetic peripheral neuropathy in patients with type 2 diabetes.	Diabetes Metab. 2018	29459007		0	-		-	-	-	-		PubMed	0	0
Effects of Curcuminoids Plus Piperine on Glycemic, Hepatic and Inflammatory Biomarkers in Patients with Type 2 Diabetes Mellitus: A Randomized Double-Blind Placebo-Controlled Trial.	Drug Res (Stuttg). 2018	29458218		0	-		-	-	-	-		PubMed	0	0
Establishment and validation of a prediction model for ischemic stroke risks in patients with type 2 diabetes.	Diabetes Res Clin Pract. 2018	29458073		0	-		-	-	-	-		PubMed	0	0
Green leafy and cruciferous vegetable consumption and risk of type 2 diabetes: results from the Singapore Chinese Health Study and meta-analysis.	Br J Nutr. 2018	29457582		0	-		-	-	-	-		PubMed	0	0
Acute vitamin C improves cardiac function, not exercise capacity, in adults with type 2 diabetes.	Diabetol Metab Syndr. 2018	29456629		0	-		-	-	-	-		PubMed	0	0
Peer support to improve diabetes care: an implementation evaluation of the Australasian Peers for Progress Diabetes Program.	BMC Public Health. 2018	29454327		0	-		-	-	-	-		PubMed	0	0
The Effect of Physical Activity Interventions on Glycosylated Haemoglobin (HbA(1c)) in Non-diabetic Populations: A Systematic Review and Meta-analysis.	Sports Med. 2018	29453742		0	-		-	-	-	-		PubMed	0	0
The effect of n-3 PUFAs on circulating adiponectin and leptin in patients with type 2 diabetes mellitus: a systematic review and meta-analysis of randomized controlled trials.	Acta Diabetol. 2018	29453672		0	-		-	-	-	-		PubMed	0	0
2018 consensus of the Taiwan Society of Cardiology and the Diabetes Association of Republic of China (Taiwan) on the pharmacological management of patients with type 2 diabetes and cardiovascular diseases.	J Chin Med Assoc. 2018	29453020		0	-		-	-	-	-		PubMed	0	0
Dietary zinc intake and whole blood zinc concentration in subjects with type 2 diabetes versus healthy subjects: A systematic review, meta-analysis and meta-regression.	J Trace Elem Med Biol. 2018	29452774		0	-		-	-	-	-		PubMed	0	0
High Prevalence of Liver Fibrosis Among European Adults with Unknown Liver Disease. A Population-Based Study.	Clin Gastroenterol Hepatol. 2018	29452268		0	-		-	-	-	-		PubMed	0	0
Effects of Canagliflozin Versus Glimepiride on Adipokines and Inflammatory Biomarkers in Type 2 Diabetes.	Metabolism. 2018	29452178		0	-		-	-	-	-		PubMed	0	0
Insulin degludec/insulin aspart lowers fasting plasma glucose and rates of confirmed and nocturnal hypoglycaemia independent of baseline HbA(1c) levels, disease duration or BMI: A pooled meta-analysis of phase 3 studies in patients with type 2 diabetes.	Diabetes Obes Metab. 2018	29451706		0	-		-	-	-	-		PubMed	0	0
EndoBarrierÂ®: a Safe and Effective Novel Treatment for Obesity and Type 2 Diabetes?	Obes Surg. 2018	29450844		0	-		-	-	-	-		PubMed	0	0
A mobile phone-based program to promote healthy behaviors among adults with prediabetes: study protocol for a pilot randomized controlled trial.	Pilot Feasibility Stud. 2018	29449958		0	-		-	-	-	-		PubMed	0	0
Glucagon-like peptide-1 receptor agonists are not associated with retinal adverse events in the FDA Adverse Event Reporting System.	BMJ Open Diabetes Res Care. 2018	29449951		0	-		-	-	-	-		PubMed	0	0
Screening for PPAR Non-Agonist Ligands Followed by Characterization of a Hit, AM-879, with Additional No-Adipogenic and cdk5-Mediated Phosphorylation Inhibition Properties.	Front Endocrinol (Lausanne). 2018	29449830		0	-		-	-	-	-		PubMed	0	0
Weekly Versus Daily Dipeptidyl Peptidase 4 Inhibitor Therapy for Type 2 Diabetes: Systematic Review and Meta-analysis.	Diabetes Care. 2018	29449311		0	-		-	-	-	-		PubMed	0	0
mHealth Technology and Nurse Health Coaching to Improve Health in Diabetes: Protocol for a Randomized Controlled Trial.	JMIR Res Protoc. 2018	29449200		0	-		-	-	-	-		PubMed	0	0
Efficacy and safety of luseogliflozin added to insulin therapy in Japanese patients with type 2 diabetes: a multicenter, 52-week, clinical study with a 16-week, double-blind period and a 36-week, open-label period.	Curr Med Res Opin. 2018	29448833		0	-		-	-	-	-		PubMed	0	0
Cultural adaptation of an evidence-based lifestyle intervention for diabetes prevention in Chinese women at risk for diabetes: results of a randomized trial.	Int Health. 2018	29447347		0	-		-	-	-	-		PubMed	0	0
Safety and tolerability of dapagliflozin, saxagliptin and metformin in combination: post hoc analysis of concomitant add-on versus sequential add-on to metformin and of triple versus dual therapy with metformin.	Diabetes Obes Metab. 2018	29446523		0	-		-	-	-	-		PubMed	0	0
GLP-1 Receptor Agonists and Cardiovascular Disease: a Meta-Analysis of Recent Cardiac Outcome Trials.	Cardiovasc Drugs Ther. 2018	29445896		0	-		-	-	-	-		PubMed	0	0
Circulating Nesfatin-1 Levels and Type 2 Diabetes: A Systematic Review and Meta-Analysis.	J Diabetes Res. 2017	29445751		0	-		-	-	-	-		PubMed	0	0
Antitumor effects of metformin via indirect inhibition of protein phosphatase 2A in patients with endometrial cancer.	PLoS One. 2018	29444159		0	-		-	-	-	-		PubMed	0	0
Effect of Vitamin E and omega 3 fatty acids in type 2 diabetes mellitus patients.	J Adv Pharm Technol Res. 2018	29441322		0	-		-	-	-	-		PubMed	0	0
Interaction Between the Sodium-Glucose-Linked Transporter 2 Inhibitor Dapagliflozin and the Loop Diuretic Bumetanide in Normal Human Subjects.	J Am Heart Assoc. 2018	29440005		0	-		-	-	-	-		PubMed	0	0
Sgemaglutide in type 2 diabetes - is it the best glucagon-like peptide 1 receptor agonist (GLP-1R agonist)?	Expert Opin Drug Metab Toxicol. 2018	29439603		0	-		-	-	-	-		PubMed	0	0
Antisense Inhibition of Protein Tyrosine Phosphatase 1B With IONIS-PTP-1B(Rx) Improves Insulin Sensitivity and Reduces Weight in Overweight Patients With Type 2 Diabetes.	Diabetes Care. 2018	29439147		0	-		-	-	-	-		PubMed	0	0
Association of fetuin-A with incident type 2 diabetes: Results from the MONICA/KORA Augsburg study and a systematic meta-analysis.	Eur J Endocrinol. 2018	29439057		0	-		-	-	-	-		PubMed	0	0
A 52-week extension study of switching from gemigliptin vs. sitagliptin to gemigliptin only as an add-on to patients with type 2 diabetes inadequately controlled on metformin alone.	Diabetes Obes Metab. 2018	29436761		0	-		-	-	-	-		PubMed	0	0
Alirocumab versus usual lipid-lowering care as add-on to statin therapy in individuals with type 2 diabetes and mixed dyslipidaemia: The ODYSSEY DM-DYSLIPIDEMIA randomized trial.	Diabetes Obes Metab. 2018	29436756		0	-		-	-	-	-		PubMed	0	0
Do Dipeptidyl Peptidase-4 Inhibitors Cause Heart Failure Events by Promoting Adrenergically-Mediated Cardiotoxicity? Clues from Laboratory Models and Clinical Trials.	Circ Res. 2018	29436388		0	-		-	-	-	-		PubMed	0	0
Efficacy of a telephone-based intervention among patients with type-2 diabetes; a randomized controlled trial in pharmacy practice.	Int J Clin Pharm. 2018	29435911		0	-		-	-	-	-		PubMed	0	0
Efficacy and Safety of Teneligliptin 40Â mg in Type 2 Diabetes: A Pooled Analysis of Two Phase III Clinical Studies.	Diabetes Ther. 2018	29435909		0	-		-	-	-	-		PubMed	0	0
Topical 5% potassium permanganate solution accelerates the healing process in chronic diabetic foot ulcers.	Biomed Rep. 2018	29435274		0	-		-	-	-	-		PubMed	0	0
The effects of vitamin D and probiotic co-supplementation on mental health parameters and metabolic status in type 2 diabetic patients with coronary heart disease: A randomized, double-blind, placebo-controlled trial.	Prog Neuropsychopharmacol Biol Psychiatry. 2018	29432877		0	-		-	-	-	-		PubMed	0	0
Momordica charantia Administration Improves Insulin Secretion in Type 2 Diabetes Mellitus.	J Med Food. 2018	29431598		0	-		-	-	-	-		PubMed	0	0
Subcutaneous semaglutide (NN9535) for the treatment of type 2 diabetes.	Expert Opin Biol Ther. 2018	29431519		0	-		-	-	-	-		PubMed	0	0
Prolonged Uninterrupted Sitting Elevates Postprandial Hyperglycaemia Proportional to Degree of Insulin Resistance.	Diabetes Obes Metab. 2018	29431272		0	-		-	-	-	-		PubMed	0	0
Dulaglutide 1.5 mg as an Add-on Option for Patients Uncontrolled on Insulin: Subgroup Analysis by Age, Duration of Diabetes and Baseline HbA1c.	Diabetes Obes Metab. 2018	29430801		0	-		-	-	-	-		PubMed	0	0
Transformation of Summary Statistics from Linear Mixed Model Association on All-or-None Traits to Odds Ratio.	Genetics. 2018	29429966		0	-		-	-	-	-		PubMed	0	0
Prospective evaluation of insulin and incretin dynamics in obese adults with and without diabetes for 2Â years after Roux-en-Y gastric bypass.	Diabetologia. 2018	29428999		0	-		-	-	-	-		PubMed	0	0
Integrated model of insulin and glucose kinetics describing both hepatic glucose and pancreatic insulin regulation.	Comput Methods Programs Biomed. 2018	29428063		0	-		-	-	-	-		PubMed	0	0
Concerted redox modulation by sulforaphane alleviates diabetes and cardiometabolic syndrome.	Free Radic Biol Med. 2018	29427794		0	-		-	-	-	-		PubMed	0	0
Barriers and strategies for oral medication adherence among children and adolescents with Type 2 diabetes.	Diabetes Res Clin Pract. 2018	29427697		0	-		-	-	-	-		PubMed	0	0
Comparison of the effects of linagliptin and voglibose on endothelial function in patients with type 2 diabetes and coronary artery disease: a prospective, randomized, pilot study (EFFORT).	Heart Vessels. 2018	29427024		0	-		-	-	-	-		PubMed	0	0
HNF1A variant, energy-reduced diets and insulin resistance improvement during weight loss: the POUNDS Lost and DIRECT trials.	Diabetes Obes Metab. 2018	29424957		0	-		-	-	-	-		PubMed	0	0
Correlations between blood uric acid and the incidence and progression of type 2 diabetes nephropathy.	Eur Rev Med Pharmacol Sci. 2018	29424910		0	-		-	-	-	-		PubMed	0	0
Effect of Intensive Blood Pressure Control in Patients with Type 2 Diabetes Mellitus Over 9 Years of Follow-Up: A Subgroup Analysis of High-Risk ACCORDION Trial Participants.	Diabetes Obes Metab. 2018	29424469		0	-		-	-	-	-		PubMed	0	0
The Effect of Soluble Fiber Supplementation on Metabolic Syndrome Profile among Newly Diagnosed Type 2 Diabetes Patients.	Clin Nutr Res. 2018	29423387		0	-		-	-	-	-		PubMed	0	0
The effectiveness of theory- and model-based lifestyle interventions on HbA1c among patients with type 2 diabetes: a systematic review and meta-analysis.	Public Health. 2018	29422139		0	-		-	-	-	-		PubMed	0	0
Results from the CLUES study: a cluster randomized trial for the evaluation of cardiovascular guideline implementation in primary care in Spain.	BMC Health Serv Res. 2018	29422049		0	-		-	-	-	-		PubMed	0	0
l-Carnosine supplementation attenuated fasting glucose, triglycerides, advanced glycation end products, and tumor necrosis factor-Î± levels in patients with type 2 diabetes: a double-blind placebo-controlled randomized clinical trial.	Nutr Res. 2018	29420997		0	-		-	-	-	-		PubMed	0	0
Effect of Treating Vitamin D Deficiency in Uncontrolled Type 2 Diabetes: A Randomized, Placebo-Controlled Study.	Am J Ther. 2018	29419533		0	-		-	-	-	-		PubMed	0	0
The effects of Internet-based exercise compared with supervised group exercise in people with type 2 diabetes: a randomized controlled study.	Clin Rehabil. 2018	29417832		0	-		-	-	-	-		PubMed	0	0
The relationship between socio-economic status and diagnosed Type 2 diabetes is changing with economic growth in Nanjing, China.	Diabet Med. 2018	29417617		0	-		-	-	-	-		PubMed	0	0
Effectiveness and Safety of a Novel Care Model for the Management of Type 2 Diabetes at 1Â Year: An Open-Label, Non-Randomized, Controlled Study.	Diabetes Ther. 2018	29417495		0	-		-	-	-	-		PubMed	0	0
Galectin-3 is independently associated with progression of nephropathy in type 2 diabetes mellitus.	Diabetologia. 2018	29417184		0	-		-	-	-	-		PubMed	0	0
A Randomized Controlled Trial of a Mini Low-Carbohydrate Diet and an Energy-Controlled Diet Among Japanese Patients With Type 2 Diabetes.	J Clin Med Res. 2018	29416575		0	-		-	-	-	-		PubMed	0	0
Green tea extract outperforms metformin in lipid profile and glycaemic control in overweight women: A double-blind, placebo-controlled, randomized trial.	Clin Nutr ESPEN. 2017	29415825		0	-		-	-	-	-		PubMed	0	0
Problem or solution: The strange story of glucagon.	Peptides. 2018	29412829		0	-		-	-	-	-		PubMed	0	0
The Vicious Cycle of Myostatin Signaling in Sarcopenic Obesity: Myostatin Role in Skeletal Muscle Growth, Insulin Signaling and Implications for Clinical Trials.	J Frailty Aging. 2018	29412438		0	-		-	-	-	-		PubMed	0	0
Evaluation of the effects of a diabetes educational program: a randomized clinical trial.	Rev Saude Publica. 2018	29412378		0	-		-	-	-	-		PubMed	0	0
Sodium-glucoser cotransporter 2 inhibitors: glucose lowering against other hypoglycemic agents.	Cardiovasc Hematol Disord Drug Targets. 2018	29412124		0	-		-	-	-	-		PubMed	0	0
Sodium-glucose cotransporter 2 inhibitors and ischemic stroke.	Cardiovasc Hematol Disord Drug Targets. 2018	29412119		0	-		-	-	-	-		PubMed	0	0
The Impact of a Cultural Lifestyle Intervention on Metabolic Parameters After Gestational Diabetes Mellitus A Randomized Controlled Trial.	Matern Child Health J. 2018	29411251		0	-		-	-	-	-		PubMed	0	0
A Randomized Placebo Controlled Clinical Trial to Determine the Impact of Digestion Resistant Starch MSPrebiotic(Â®) on Glucose, Insulin, and Insulin Resistance in Elderly and Mid-Age Adults.	Front Med (Lausanne). 2017	29410955		0	-		-	-	-	-		PubMed	0	0
A shared latent space matrix factorisation method for recommending new trial evidence for systematic review updates.	J Biomed Inform. 2018	29410356		0	-		-	-	-	-		PubMed	0	0
Differential effects of saturated fatty acids on the risk of metabolic syndrome: a matched case-control and meta-analysis study.	Metabolism. 2018	29410352		0	-		-	-	-	-		PubMed	0	0
A case-control study and meta-analysis confirm glucokinase regulatory gene rs780094 is a risk factor for gestational diabetes mellitus.	Gene. 2018	29410004		0	-		-	-	-	-		PubMed	0	0
Soy and the risk of type 2 diabetes mellitus: A systematic review and meta-analysis of observational studies.	Diabetes Res Clin Pract. 2018	29407270		0	-		-	-	-	-		PubMed	0	0
Would glucagon-like peptide-1 receptor agonists have efficacy in binge eating disorder and bulimia nervosa? A review of the current literature.	Med Hypotheses. 2018	29407005		0	-		-	-	-	-		PubMed	0	0
Remission of hyperglycemia after withdrawal of oral antidiabetic drugs in Japanese patients with early stage of type 2 diabetes.	J Diabetes Investig. 2018	29406607		0	-		-	-	-	-		PubMed	0	0
Metformin does not Affect Postabsorptive Hepatic Free Fatty Acid Uptake, Oxidation or Resecretion in Humans: A 3-months Placebo Controlled Clinical Trial in Patients with Type 2 Diabetes and Healthy Controls.	Diabetes Obes Metab. 2018	29405635		0	-		-	-	-	-		PubMed	0	0
Effect of race on the glycaemic response to sitagliptin: Insights from the Trial Evaluating Cardiovascular Outcomes with Sitagliptin (TECOS).	Diabetes Obes Metab. 2018	29405540		0	-		-	-	-	-		PubMed	0	0
Diabetic retinopathy in a remote Indigenous primary healthcare population: a Central Australian diabetic retinopathy screening study in the Telehealth Eye and Associated Medical Services Network project.	Diabet Med. 2018	29405370		0	-		-	-	-	-		PubMed	0	0
Intermittent fasting in Type 2 diabetes mellitus and the risk of hypoglycaemia: a randomized controlled trial.	Diabet Med. 2018	29405359		0	-		-	-	-	-		PubMed	0	0
Care Management to Promote Treatment Adherence in Patients with Cognitive Impairment and Vascular Risk Factors: A Demonstration Project.	J Prev Alzheimers Dis. 2018	29405231		0	-		-	-	-	-		PubMed	0	0
Peripheral and Central Effects of Memantine in a Mixed Preclinical Mice Model of Obesity and Familial Alzheimer's Disease.	Mol Neurobiol. 2018	29404958		0	-		-	-	-	-		PubMed	0	0
Motivational factors for initiating, implementing, and maintaining physical activity behavior following a rehabilitation program for patients with type 2 diabetes: a longitudinal, qualitative, interview study.	Patient Prefer Adherence. 2018	29403266		0	-		-	-	-	-		PubMed	0	0
Bardoxolone Methyl Improves Kidney Function in Patients with Chronic Kidney Disease Stage 4 and Type 2 Diabetes: Post-Hoc Analyses from Bardoxolone Methyl Evaluation in Patients with Chronic Kidney Disease and Type 2 Diabetes Study.	Am J Nephrol. 2018	29402767		0	-		-	-	-	-		PubMed	0	0
Effects of aerobic or resistance exercise training on cardiovascular autonomic function of subjects with type 2 diabetes: A pilot study.	Nutr Metab Cardiovasc Dis. 2018	29402509		0	-		-	-	-	-		PubMed	0	0
Effect of sitagliptin on tissue characteristics of the carotid wall in patients with type 2 diabetes: a post hoc sub-analysis of the sitagliptin preventive study of intima-media thickness evaluation (SPIKE).	Cardiovasc Diabetol. 2018	29402270		0	-		-	-	-	-		PubMed	0	0
Effects of telmisartan on vascular endothelial function, inflammation and insulin resistance in patients with coronary heart disease and diabetes mellitus.	Exp Ther Med. 2018	29399098		0	-		-	-	-	-		PubMed	0	0
Involvement of microRNA-146a in diabetic peripheral neuropathy through the regulation of inflammation.	Drug Des Devel Ther. 2018	29398906		0	-		-	-	-	-		PubMed	0	0
Sleep Duration Modifies the Association of Overtime Work With Risk of Developing Type 2 Diabetes: Japan Epidemiology Collaboration on Occupational Health Study.	J Epidemiol. 2018	29398682		0	-		-	-	-	-		PubMed	0	0
Racial differences in spatial patterns for poor glycemic control in the Southeastern United States.	Ann Epidemiol. 2018	29398299		0	-		-	-	-	-		PubMed	0	0
Lipid Profiles, Inflammatory Markers, and Insulin Therapy in Youth with Type 2 Diabetes.	J Pediatr. 2018	29398050		0	-		-	-	-	-		PubMed	0	0
Multidisciplinary coordinated care for Type 2 diabetes: A qualitative analysis of patient perspectives.	Prim Care Diabetes. 2018	29397351		0	-		-	-	-	-		PubMed	0	0
The identification of higher forefoot temperatures associated with peripheral arterial disease in type 2 diabetes mellitus as detected by thermography.	Prim Care Diabetes. 2018	29396205		0	-		-	-	-	-		PubMed	0	0
Flunarizine and the risk of parkinsonism in a newly diagnosed type 2 diabetic population in Taiwan: A nested case-control study.	J Clin Neurosci. 2018	29396059		0	-		-	-	-	-		PubMed	0	0
Can persistent organic pollutants distinguish between two opposite metabolic phenotypes in lean Koreans?	Diabetes Metab. 2018	29395811		0	-		-	-	-	-		PubMed	0	0
Role of fatty liver in the association between obesity and reduced hepatic insulin clearance.	Diabetes Metab. 2017	29395810		0	-		-	-	-	-		PubMed	0	0
Blood pressure and cardiovascular outcomes in patients with diabetes and high cardiovascular risk.	Eur Heart J. 2018	29394350		0	-		-	-	-	-		PubMed	0	0
Uric Acid as a Cause of the Metabolic Syndrome.	Contrib Nephrol. 2018	29393133		0	-		-	-	-	-		PubMed	0	0
New determinants for gallstone disease?â€©.	Dan Med J. 2018	29393043		0	-		-	-	-	-		PubMed	0	0
Chronic apelin treatment improves hepatic lipid metabolism in obese and insulin-resistant mice by an indirect mechanism.	Endocrine. 2018	29392617		0	-		-	-	-	-		PubMed	0	0
Metformin use and its effect on gastric cancer in patients with type 2 diabetes: A systematic review of observational studies.	Oncol Lett. 2018	29391902		0	-		-	-	-	-		PubMed	0	0
Effects of Qijian mixture on type 2 diabetes assessed by metabonomics, gut microbiota and network pharmacology.	Pharmacol Res. 2018	29391233		0	-		-	-	-	-		PubMed	0	0
Effect of probiotics on lipid profiles and blood pressure in patients with type 2 diabetes: A meta-analysis of RCTs.	Medicine (Baltimore). 2017	29390450		0	-		-	-	-	-		PubMed	0	0
Diabetes mellitus is a risk factor for low bone mass-related fractures: A meta-analysis of cohort studies.	Medicine (Baltimore). 2017	29390417		0	-		-	-	-	-		PubMed	0	0
Effect of Lactobacillus casei strain Shirota-fermented milk on metabolic abnormalities in obese prediabetic Japanese men: a randomised, double-blind, placebo-controlled trial.	Biosci Microbiota Food Health. 2018	29387517		0	-		-	-	-	-		PubMed	0	0
Exercise or physical activity and cognitive function in adults with type 2 diabetes, insulin resistance or impaired glucose tolerance: a systematic review.	Eur Rev Aging Phys Act. 2018	29387262		0	-		-	-	-	-		PubMed	0	0
I've made this my lifestyle now": a prospective qualitative study of motivation for lifestyle change among people with newly diagnosed type two diabetes mellitus.	BMC Public Health. 2018	29386030		0	-		-	-	-	-		PubMed	0	0
A Randomized Double-Blinded, Placebo-Controlled Trial Investigating the Effect of Fish Oil Supplementation on Gene Expression Related to Insulin Action, Blood Lipids, and Inflammation in Gestational Diabetes Mellitus-Fish Oil Supplementation and Gestational Diabetes.	Nutrients. 2018	29385062		0	-		-	-	-	-		PubMed	0	0
Liver Fat Scores Moderately Reflect Interventional Changes in Liver Fat Content by a Low-Fat Diet but Not by a Low-Carb Diet.	Nutrients. 2018	29385034		0	-		-	-	-	-		PubMed	0	0
Astaxanthin improves glucose metabolism and reduces blood pressure in patients with type 2 diabetes mellitus.	Asia Pac J Clin Nutr. 2018	29384321		0	-		-	-	-	-		PubMed	0	0
Different effects of metformin and insulin on primary and secondary chemoprevention of colorectal adenoma in diabetes type 2: Traditional and Bayesian meta-analysis.	EXCLI J. 2018	29383018		0	-		-	-	-	-		PubMed	0	0
Plasma Connective Tissue Growth Factor (CTGF/CCN2) Levels Predict Myocardial Infarction in the Veterans Affairs Diabetes Trial (VADT) Cohort.	Diabetes Care. 2018	29382658		0	-		-	-	-	-		PubMed	0	0
Built environmental characteristics and diabetes: a systematic review and meta-analysis.	BMC Med. 2018	29382337		0	-		-	-	-	-		PubMed	0	0
A Prospective Multicenter Evaluation of the Accuracy of a Novel Implanted Continuous Glucose Sensor: PRECISE II.	Diabetes Technol Ther. 2018	29381090		0	-		-	-	-	-		PubMed	0	0
Development and validation of risk models to predict the 7-year risk of type 2 diabetes: The Japan Epidemiology Collaboration on Occupational Health Study.	J Diabetes Investig. 2018	29380553		0	-		-	-	-	-		PubMed	0	0
Mid- and Long-Term Health Risks in Living Kidney Donors: A Systematic Review and Meta-analysis.	Ann Intern Med. 2018	29379948		0	-		-	-	-	-		PubMed	0	0
Effect of wine on carotid atherosclerosis in type 2 diabetes: a 2-year randomized controlled trial.	Eur J Clin Nutr. 2018	29379143		0	-		-	-	-	-		PubMed	0	0
Repurposing Metformin for Cardiovascular Disease.	Circulation. 2018	29378754		0	-		-	-	-	-		PubMed	0	0
Economic evaluation of type 2 diabetes prevention programmes: Markov model of low- and high-intensity lifestyle programmes and metformin in participants with different categories of intermediate hyperglycaemia.	BMC Med. 2018	29378576		0	-		-	-	-	-		PubMed	0	0
Cashew Nut Consumption Increases HDL Cholesterol and Reduces Systolic Blood Pressure in Asian Indians with Type 2 Diabetes: A 12-Week Randomized Controlled Trial.	J Nutr. 2018	29378038		0	-		-	-	-	-		PubMed	0	0
Dulaglutide treatment results in effective glycaemic control in latent autoimmune diabetes in adults (LADA): A post-hoc analysis of the AWARD-2, -4 and -5 Trials.	Diabetes Obes Metab. 2018	29377522		0	-		-	-	-	-		PubMed	0	0
Two-year trial of intermittent insulin therapy vs metformin for the preservation of Î²-cell function after initial short-term intensive insulin induction in early type 2 diabetes.	Diabetes Obes Metab. 2018	29377408		0	-		-	-	-	-		PubMed	0	0
Diet/lifestyle and risk of diabetes and glycemic traits: a Mendelian randomization study.	Lipids Health Dis. 2018	29375034		0	-		-	-	-	-		PubMed	0	0
Understanding Diabetes-Related Distress Characteristics and Psychosocial Support Preferences of Urban African American Adults Living With Type 2 Diabetes: A Mixed-Methods Study.	Diabetes Educ. 2018	29375023		0	-		-	-	-	-		PubMed	0	0
Comparing Three Data Mining Algorithms for Identifying the Associated Risk Factors of Type 2 Diabetes	Iran Biomed J. 2018	29374085		0	-		-	-	-	-		PubMed	0	0
Determinants of cognitive function in individuals with type 2 diabetes mellitus: A meta-analysis.	Ann Clin Psychiatry. 2018	29373617		0	-		-	-	-	-		PubMed	0	0
Sodium-glucose co-transporter 2 inhibitors and cardiovascular outcomes: A systematic review and meta-analysis.	Eur J Prev Cardiol. 2018	29372664		0	-		-	-	-	-		PubMed	0	0
The accuracy of a non-invasive glucose monitoring device does not depend on clinical characteristics of people with type 2 diabetes mellitus.	J Drug Assess. 2018	29372110		0	-		-	-	-	-		PubMed	0	0
Gut Microbial Diversity in Women with Polycystic Ovary Syndrome Correlates with Hyperandrogenism.	J Clin Endocrinol Metab. 2018	29370410		0	-		-	-	-	-		PubMed	0	0
The effect of concomitant DPPIVi use on glycaemic control and hypoglycaemia with insulin glargine 300 U/mL (Gla-300) versus insulin glargine 100 U/mL (Gla-100) in people with type 2 diabetes: A patient-level meta-analysis of EDITION 2 and 3.	PLoS One. 2018	29370218		0	-		-	-	-	-		PubMed	0	0
Pre-Meal Effect of Whey Proteins on Metabolic Parameters in Subjects with and without Type 2 Diabetes: A Randomized, Crossover Trial.	Nutrients. 2018	29370144		0	-		-	-	-	-		PubMed	0	0
Comparisons of diabetic retinopathy events associated with glucose-lowering drugs in patients with type 2 diabetes mellitus: A network meta-analysis.	Diabetes Obes Metab. 2018	29369494		0	-		-	-	-	-		PubMed	0	0
Injecting without pressing a button: An exploratory study of a shield-triggered injection mechanism.	Diabetes Obes Metab. 2017	29369493		0	-		-	-	-	-		PubMed	0	0
Serum 25-hydroxyvitamin D and risk of type 2 diabetes in older adults: A dose-response meta-analysis of prospective cohort studies: Retraction.	Medicine (Baltimore). 2018	29369225		0	-		-	-	-	-		PubMed	0	0
CONSENSUS STATEMENT BY THE AMERICAN ASSOCIATION OF CLINICAL ENDOCRINOLOGISTS AND AMERICAN COLLEGE OF ENDOCRINOLOGY ON THE COMPREHENSIVE TYPE 2 DIABETES MANAGEMENT ALGORITHM - 2018 EXECUTIVE SUMMARY.	Endocr Pract. 2018	29368965		0	-		-	-	-	-		PubMed	0	0
Glitazones and alpha-glucosidase inhibitors as the second-line oral anti-diabetic agents added to metformin reduce cardiovascular risk in Type 2 diabetes patients: a nationwide cohort observational study.	Cardiovasc Diabetol. 2018	29368615		0	-		-	-	-	-		PubMed	0	0
Study protocol: a randomised controlled trial of supervised resistance training versus aerobic training in Sri Lankan adults with type 2 diabetes mellitus: SL-DART study.	BMC Public Health. 2018	29368598		0	-		-	-	-	-		PubMed	0	0
LY2963016 Insulin Glargine: A Review in Type 1 and 2 Diabetes.	BioDrugs. 2018	29368288		0	-		-	-	-	-		PubMed	0	0
Effects of linagliptin monotherapy compared with voglibose on postprandial lipid profiles in Japanese patients with type 2 diabetes: linagliptin study of effects on postprandial blood glucose (L-STEP) sub-study 1.	Endocr J. 2018	29367471		0	-		-	-	-	-		PubMed	0	0
Hand dysfunction in type 2 diabetes mellitus: Systematic review with meta-analysis.	Ann Phys Rehabil Med. 2018	29366905		0	-		-	-	-	-		PubMed	0	0
Effects of Coenzyme Q10 Supplementation on Serum Values of Gamma-glutamyl transferase, Pseudocholinesterase, Bilirubin, Ferritin, and High-Sensitivity C-Reactive Protein in Women with Type 2 Diabetes.	Exp Clin Endocrinol Diabetes. 2018	29365333		0	-		-	-	-	-		PubMed	0	0
What have we learnt from "real world" data, observational studies and meta-analyses.	Diabetes Obes Metab. 2018	29364585		0	-		-	-	-	-		PubMed	0	0
Dipeptidyl Peptidase-4 Inhibitors and Heart Failure Exacerbation in the Veteran Population: An Observational Study.	Pharmacotherapy. 2018	29364549		0	-		-	-	-	-		PubMed	0	0
Development and validation of a questionnaire for assessing the characteristics of diet and physical activity in patients with type 2 diabetes.	Psicothema. 2018	29363480		0	-		-	-	-	-		PubMed	0	0
Effects of calorie restriction plus fish oil supplementation on abnormal metabolic characteristics and the iron status of middle-aged obese women.	Food Funct. 2018	29362766		0	-		-	-	-	-		PubMed	0	0
Comparative Study on Adding Pioglitazone or Sitagliptin to Patients with Type 2 Diabetes Mellitus Insufficiently Controlled With Metformin.	Open Access Maced J Med Sci. 2017	29362626		0	-		-	-	-	-		PubMed	0	0
Incremental predictive value of screening for anxiety and depression beyond current type 2 diabetes risk models: a prospective cohort study.	BMJ Open. 2018	29362254		0	-		-	-	-	-		PubMed	0	0
Long-term effects of Garcinia cambogia/Glucomannan on weight loss in people with obesity, PLIN4, FTO and Trp64Arg polymorphisms.	BMC Complement Altern Med. 2018	29361938		0	-		-	-	-	-		PubMed	0	0
Effect of resveratrol on blood pressure: A systematic review and meta-analysis of randomized, controlled, clinical trials.	Crit Rev Food Sci Nutr. 2018	29359958		0	-		-	-	-	-		PubMed	0	0
Do sodium-glucose co-transporter-2 inhibitors prevent heart failure with a preserved ejection fraction by counterbalancing the effects of leptin? A novel hypothesis.	Diabetes Obes Metab. 2018	29359851		0	-		-	-	-	-		PubMed	0	0
Optimizing the management of hypoglycaemia in individuals with type 2 diabetes: A randomized crossover comparison of a weight-based protocol compared with two fixed-dose glucose regimens.	Diabetes Obes Metab. 2018	29359848		0	-		-	-	-	-		PubMed	0	0
Association of obesity with hypertension and type 2 diabetes mellitus in India: A meta-analysis of observational studies.	World J Diabetes. 2018	29359028		0	-		-	-	-	-		PubMed	0	0
Nonalcoholic Fatty Liver Disease and Risk of Incident Type 2 Diabetes: A Meta-analysis.	Diabetes Care. 2018	29358469		0	-		-	-	-	-		PubMed	0	0
Mortality Reduction in EMPA-REG OUTCOME Trial: Beyond the Antidiabetes Effect.	Diabetes Care. 2018	29358464		0	-		-	-	-	-		PubMed	0	0
The cost-effectiveness of dulaglutide versus insulin glargine for the treatment of type 2 diabetes mellitus in Japan.	J Med Econ. 2018	29357718		0	-		-	-	-	-		PubMed	0	0
Structured peer-led diabetes self-management and support in a low-income country: The ST2EP randomised controlled trial in Mali.	PLoS One. 2018	29357380		0	-		-	-	-	-		PubMed	0	0
Effects of Aerobic and Resistance Exercise on Metabolic Syndrome, Sarcopenic Obesity, and Circulating Biomarkers in Overweight or Obese Survivors of Breast Cancer: A Randomized Controlled Trial.	J Clin Oncol. 2018	29356607		0	-		-	-	-	-		PubMed	0	0
Effect of Diabetes Sleep Education for T2DM Who Sleep After Midnight: A Pilot Study from China.	Metab Syndr Relat Disord. 2018	29356602		0	-		-	-	-	-		PubMed	0	0
Direct and indirect health economic impact of hypoglycaemia in a global population of patients with insulin-treated diabetes.	Diabetes Res Clin Pract. 2018	29355651		0	-		-	-	-	-		PubMed	0	0
Anti-Insulin Antibodies and Adverse Events with Biosimilar Insulin Lispro Compared with Humalog Insulin Lispro in People with Diabetes.	Diabetes Technol Ther. 2018	29355435		0	-		-	-	-	-		PubMed	0	0
Predictors of Insulin Initiation in Patients with Type 2 Diabetes: An Analysis of the Look AHEAD Randomized Trial.	J Gen Intern Med. 2018	29352421		0	-		-	-	-	-		PubMed	0	0
Correction: Cardiovascular Effect of Incretin-Based Therapy in Patients with Type 2 Diabetes Mellitus: Systematic Review and Meta-Analysis.	PLoS One. 2018	29352297		0	-		-	-	-	-		PubMed	0	0
Occupational Therapy Intervention Improves Glycemic Control and Quality of Life Among Young Adults With Diabetes: the Resilient, Empowered, Active Living With Diabetes (REAL Diabetes) Randomized Controlled Trial.	Diabetes Care. 2018	29351961		0	-		-	-	-	-		PubMed	0	0
Practice pearl: liraglutide and cardiovascular and renal events in type 2 diabetes.	Postgrad Med. 2018	29350569		0	-		-	-	-	-		PubMed	0	0
Effectiveness of A Body Shape Index (ABSI) in predicting chronic diseases and mortality: a systematic review and meta-analysis.	Obes Rev. 2018	29349876		0	-		-	-	-	-		PubMed	0	0
Cost-Effectiveness of Empagliflozin for the Treatment of Patients with Type 2 Diabetes Mellitus at Increased Cardiovascular Risk in Greece.	Clin Drug Investig. 2018	29349708		0	-		-	-	-	-		PubMed	0	0
The effect and safety of diacerein in patients with type 2 diabetes mellitus : a systematic review and meta-analysis.	Am J Clin Exp Immunol. 2017	29348985		0	-		-	-	-	-		PubMed	0	0
A Phase 1, Randomized, Placebo- and Active-Controlled Crossover Study to Determine the Effect of Single-Dose Ertugliflozin on QTc Interval in Healthy Volunteers.	Clin Pharmacol Drug Dev. 2018	29346837		0	-		-	-	-	-		PubMed	0	0
The pharmacological management of metabolic syndrome.	Expert Rev Clin Pharmacol. 2018	29345505		0	-		-	-	-	-		PubMed	0	0
Whole Egg Consumption Exerts a Nephroprotective Effect in an Acute Rodent Model of Type 1 Diabetes.	J Agric Food Chem. 2018	29345464		0	-		-	-	-	-		PubMed	0	0
The Effect of Self-Care Education on Emotional Intelligence and HbA1c level in Patients with Type 2 Diabetes Mellitus: A Randomized Controlled Clinical Trial.	Int J Community Based Nurs Midwifery. 2018	29344534		0	-		-	-	-	-		PubMed	0	0
Associations between body mass index and the risk of renal events in patients with type 2 diabetes.	Nutr Diabetes. 2018	29343817		0	-		-	-	-	-		PubMed	0	0
The effects of green cardamom supplementation on blood glucose, lipids profile, oxidative stress, sirtuin-1 and irisin in type 2 diabetic patients: a study protocol for a randomized placebo-controlled clinical trial.	BMC Complement Altern Med. 2018	29343256		0	-		-	-	-	-		PubMed	0	0
Trajectories of alcohol consumption prior to the diagnosis of type 2 diabetes: a longitudinal case-cohort study.	Int J Epidemiol. 2018	29342257		0	-		-	-	-	-		PubMed	0	0
Clinical Inertia in a Randomized Trial of Telemedicine-Based Chronic Disease Management: Lessons Learned.	Telemed J E Health. 2018	29341850		0	-		-	-	-	-		PubMed	0	0
Smart Care Based on Telemonitoring and Telemedicine for Type 2 Diabetes Care: Multi-center Randomized Controlled Trial.	Telemed J E Health. 2018	29341843		0	-		-	-	-	-		PubMed	0	0
Identification of stress-related microRNA biomarkers in type 2 diabetes mellitus: A systematic review and meta-analysis.	J Diabetes. 2018	29341487		0	-		-	-	-	-		PubMed	0	0
Effect of immediate and prolonged GLP-1 receptor agonist administration on uric acid and kidney clearance: Post-hoc analyses of four clinical trials.	Diabetes Obes Metab. 2018	29341461		0	-		-	-	-	-		PubMed	0	0
Long-term expression of glomerular genes in diabetic nephropathy.	Nephrol Dial Transplant. 2018	29340699		0	-		-	-	-	-		PubMed	0	0
Lifestyle Intervention and Medical Management With vs Without Roux-en-Y Gastric Bypass and Control of Hemoglobin A1c, LDL Cholesterol, and Systolic Blood Pressure at 5 Years in the Diabetes Surgery Study.	JAMA. 2018	29340678		0	-		-	-	-	-		PubMed	0	0
Effect of Laparoscopic Sleeve Gastrectomy vs Laparoscopic Roux-en-Y Gastric Bypass on Weight Loss at 5 Years Among Patients With Morbid Obesity: The SLEEVEPASS Randomized Clinical Trial.	JAMA. 2018	29340676		0	-		-	-	-	-		PubMed	0	0
Long-term effects of sitagliptin in patients with type 2 diabetes mellitus and hypertension: results from the PROLOGUE study.	Oncotarget. 2017	29340105		0	-		-	-	-	-		PubMed	0	0
Diminished androgen and estrogen receptors and aromatase levels in hypogonadal diabetic men: reversal with testosterone.	Eur J Endocrinol. 2018	29339527		0	-		-	-	-	-		PubMed	0	0
Kidney Biomarkers and Decline in eGFR in Patients with Type 2 Diabetes.	Clin J Am Soc Nephrol. 2018	29339356		0	-		-	-	-	-		PubMed	0	0
Mendelian randomization analysis to assess a causal effect of haptoglobin on macroangiopathy in Chinese type 2 diabetes patients.	Cardiovasc Diabetol. 2018	29338727		0	-		-	-	-	-		PubMed	0	0
Effect of a group medical clinic for veterans with diabetes on body mass index.	Chronic Illn. 2018	29338320		0	-		-	-	-	-		PubMed	0	0
Value of adding the renal pathological score to the kidney failure risk equation in advanced diabetic nephropathy.	PLoS One. 2018	29338014		0	-		-	-	-	-		PubMed	0	0
Increased risk of ischemic heart disease, hypertension, and type 2 diabetes in women with previous gestational diabetes mellitus, a target group in general practice for preventive interventions: A population-based cohort study.	PLoS Med. 2018	29337985		0	-		-	-	-	-		PubMed	0	0
The effects of physical activity on chronic subclinical systemic inflammation.	Arh Hig Rada Toksikol. 2017	29337679		0	-		-	-	-	-		PubMed	0	0
Causal associations between risk factors and common diseases inferred from GWAS summary data.	Nat Commun. 2018	29335400		0	-		-	-	-	-		PubMed	0	0
Walking prescription of 10 000 steps per day in patients with type 2 diabetes mellitus: a randomised trial in Nigerian general practice.	Br J Gen Pract. 2018	29335328		0	-		-	-	-	-		PubMed	0	0
Effects of three frequencies of self-monitored blood glucose on HbA1c and quality of life in patients with type 2 diabetes with once daily insulin and stable control: a randomized trial.	BMC Res Notes. 2018	29334997		0	-		-	-	-	-		PubMed	0	0
The introduction of simple cardiorespiratory fitness testing in overweight/obese type 2 diabetics: a pilot study.	Prim Health Care Res Dev. 2018	29331169		0	-		-	-	-	-		PubMed	0	0
Evaluation of the Effect of Alogliptin on Tissue Characteristics of the Carotid Wall: Subanalysis of the SPEAD-A Trial.	Diabetes Ther. 2018	29330812		0	-		-	-	-	-		PubMed	0	0
Impact of sirtuin-1 expression on H3K56 acetylation and oxidative stress: a double-blind randomized controlled trial with resveratrol supplementation.	Acta Diabetol. 2018	29330620		0	-		-	-	-	-		PubMed	0	0
High-intensity interval training versus continuous training on physiological and metabolic variables in prediabetes and type 2 diabetes: A meta-analysis.	Diabetes Res Clin Pract. 2018	29329778		0	-		-	-	-	-		PubMed	0	0
Obesity and abnormal glucose tolerance in offspring of diabetic mothers: A systematic review and meta-analysis.	PLoS One. 2018	29329330		0	-		-	-	-	-		PubMed	0	0
Short and medium-term efficacy of sodium glucose co-transporter-2 (SGLT-2) inhibitors: A meta-analysis of randomized clinical trials.	Diabetes Obes Metab. 2018	29327406		0	-		-	-	-	-		PubMed	0	0
Vitamin D(3)-fortified milk did not affect glycemic control, lipid profile, and anthropometric measures in patients with type 2 diabetes, a triple-blind randomized clinical trial.	Eur J Clin Nutr. 2018	29326421		0	-		-	-	-	-		PubMed	0	0
Achievement of guideline targets for blood pressure, lipid, and glycaemic control in type 2 diabetes: A meta-analysis.	Diabetes Res Clin Pract. 2018	29325774		0	-		-	-	-	-		PubMed	0	0
Long-Term Effects of an Intensive Lifestyle Intervention on Electrocardiographic Criteria for Left Ventricular Hypertrophy: The Look AHEAD Trial.	Am J Hypertens. 2018	29324968		0	-		-	-	-	-		PubMed	0	0
Incretin responses to oral glucose and mixed meal tests and changes in fasting glucose levels during 7 years of follow-up: The Hoorn Meal Study.	PLoS One. 2018	29324870		0	-		-	-	-	-		PubMed	0	0
PREVIEW (Prevention of Diabetes Through Lifestyle Intervention and Population Studies in Europe and Around the World) study in children aged 10 to 17â€‰years: Design, methods and baseline results.	Diabetes Obes Metab. 2018	29322617		0	-		-	-	-	-		PubMed	0	0
Safety and efficacy of once-weekly semaglutide vs additional oral antidiabetic drugs in Japanese people with inadequately controlled type 2 diabetes: A randomized trial.	Diabetes Obes Metab. 2018	29322610		0	-		-	-	-	-		PubMed	0	0
Effects of Ipragliflozin on Postprandial Glucose Metabolism and Gut Peptides in Type 2 Diabetes: A Pilot Study.	Diabetes Ther. 2018	29322485		0	-		-	-	-	-		PubMed	0	0
Hepatitis C virus infection and development of type 2 diabetes mellitus: Systematic review and meta-analysis of the literature.	Rev Endocr Metab Disord. 2018	29322398		0	-		-	-	-	-		PubMed	0	0
Plasma adiponectin levels and type 2 diabetes risk: a nested case-control study in a Chinese population and an updated meta-analysis.	Sci Rep. 2018	29321603		0	-		-	-	-	-		PubMed	0	0
Metformin, Asian ethnicity and risk of prostate cancer in type 2 diabetes: a systematic review and meta-analysis.	BMC Cancer. 2018	29320995		0	-		-	-	-	-		PubMed	0	0
The cardiovascular effect of incretin-based therapies among type 2 diabetes: a systematic review and network meta-analysis.	Expert Opin Drug Saf. 2018	29320889		0	-		-	-	-	-		PubMed	0	0
Long-Term Survivor Characteristics in Hemodialysis Patients with Type 2 Diabetes.	Am J Nephrol. 2018	29320770		0	-		-	-	-	-		PubMed	0	0
Is Hypovitaminosis D Related to Incidence of Type 2 Diabetes and High Fasting Glucose Level in Healthy Subjects: A Systematic Review and Meta-Analysis of Observational Studies.	Nutrients. 2018	29320437		0	-		-	-	-	-		PubMed	0	0
Development and external validation of risk scores for cardiovascular hospitalisation and rehospitalisation in diabetes patients.	J Clin Endocrinol Metab. 2018	29319819		0	-		-	-	-	-		PubMed	0	0
Group cognitive behavioural therapy and weight regain after diet in type 2 diabetes: results from the randomised controlled POWER trial.	Diabetologia. 2018	29318342		0	-		-	-	-	-		PubMed	0	0
Obesity in Mexico: prevalence, comorbidities, associations with patient outcomes, and treatment experiences.	Diabetes Metab Syndr Obes. 2018	29317841		0	-		-	-	-	-		PubMed	0	0
Safety and efficacy of sodium-glucose cotransporter 2 (SGLT2) inhibitors in type 1 diabetes: A systematic review and meta-analysis.	Diabetes Res Clin Pract. 2018	29317332		0	-		-	-	-	-		PubMed	0	0
App-technology to increase physical activity among patients with diabetes type 2 - the DiaCert-study, a randomized controlled trial.	BMC Public Health. 2018	29316905		0	-		-	-	-	-		PubMed	0	0
Long-term safety and efficacy of tofogliflozin as add-on to insulin in patients with type 2 diabetes: Results from a 52-week, multicentre, randomized, double-blind, open-label extension, Phase 4 study in Japan (J-STEP/INS).	Diabetes Obes Metab. 2018	29316236		0	-		-	-	-	-		PubMed	0	0
Effect of prandial treatment timing adjustment, based on continuous glucose monitoring, in patients with type 2 diabetes uncontrolled on once daily basal insulin: a randomized, phase IV study.	Diabetes Obes Metab. 2018	29316176		0	-		-	-	-	-		PubMed	0	0
European versus Asian differences for the associations between paraoxonase-1 genetic polymorphisms and susceptibility to type 2 diabetes mellitus.	J Cell Mol Med. 2018	29314660		0	-		-	-	-	-		PubMed	0	0
Treatment Dosing Patterns and Clinical Outcomes for Patients with Type 2 Diabetes Starting or Switching to Treatment with Insulin Glargine (300 Units per Milliliter) in a Real-World Setting: A Retrospective Observational Study.	Adv Ther. 2018	29313285		0	-		-	-	-	-		PubMed	0	0
Impact of Canagliflozin Treatment on Health-Related Quality of Life among People with Type 2 Diabetes Mellitus: A Pooled Analysis of Patient-Reported Outcomes from Randomized Controlled Trials.	Patient. 2018	29313267		0	-		-	-	-	-		PubMed	0	0
Empagliflozin Limits Myocardial Infarction in Vivo and Cell Death in Vitro: Role of STAT3, Mitochondria, and Redox Aspects.	Front Physiol. 2017	29311992		0	-		-	-	-	-		PubMed	0	0
The Associations between Apolipoprotein E Gene Epsilon2/Epsilon3/Epsilon4 Polymorphisms and the Risk of Coronary Artery Disease in Patients with Type 2 Diabetes Mellitus.	Front Physiol. 2017	29311965		0	-		-	-	-	-		PubMed	0	0
Increased Risk of Severe Hypoglycemic Events Before and After Cardiovascular Outcomes in TECOS Suggests an At-Risk Type 2 Diabetes Frail Patient Phenotype.	Diabetes Care. 2018	29311155		0	-		-	-	-	-		PubMed	0	0
Erratum. Mitigating Cardiovascular Risk in Type 2 Diabetes With Antidiabetes Drugs: A Review of Principal Cardiovascular Outcome Results of EMPA-REG OUTCOME, LEADER, and SUSTAIN-6 Trials. Diabetes Care 2017;40:821-831.	Diabetes Care. 2018	29311153		0	-		-	-	-	-		PubMed	0	0
Prognostic Value of High-Sensitivity Versus Conventional Cardiac Troponin T Assays Among Patients With Type 2 Diabetes Mellitus Undergoing Maintenance Hemodialysis.	Am J Kidney Dis. 2018	29310884		0	-		-	-	-	-		PubMed	0	0
Effects of 6-month treatment with the glucagon like peptide-1 analogue liraglutide on arterial stiffness, left ventricular myocardial deformation and oxidative stress in subjects with newly diagnosed type 2 diabetes.	Cardiovasc Diabetol. 2018	29310645		0	-		-	-	-	-		PubMed	0	0
Exercise training during pregnancy reduces circulating insulin levels in overweight/obese women postpartum: secondary analysis of a randomised controlled trial (the ETIP trial).	BMC Pregnancy Childbirth. 2018	29310617		0	-		-	-	-	-		PubMed	0	0
Haemoglobin glycation index and risk for diabetes-related complications in the Action in Diabetes and Vascular Disease: Preterax and Diamicron Modified Release Controlled Evaluation (ADVANCE) trial.	Diabetologia. 2018	29308539		0	-		-	-	-	-		PubMed	0	0
Effects of incretin treatment on cardiovascular outcomes in diabetic STEMI-patients with culprit obstructive and multivessel non obstructive-coronary-stenosis.	Diabetol Metab Syndr. 2018	29308090		0	-		-	-	-	-		PubMed	0	0
Phlorizin Exerts Direct Protective Effects on Palmitic Acid (PA)-Induced Endothelial Dysfunction by Activating the PI3K/AKT/eNOS Signaling Pathway and Increasing the Levels of Nitric Oxide (NO).	Med Sci Monit Basic Res. 2018	29307883		0	-		-	-	-	-		PubMed	0	0
Metabolically healthy obesity without fatty liver and risk of incident type 2 diabetes: A meta-analysis of prospective cohort studies.	Obes Res Clin Pract. 2018	29307656		0	-		-	-	-	-		PubMed	0	0
Vascular legacy beyond blood pressure control: benefits of perindopril/indapamide combination in hypertensive patients with diabetes.	Curr Med Res Opin. 2018	29307229		0	-		-	-	-	-		PubMed	0	0
A Whole-Grain Diet Reduces Peripheral Insulin Resistance and Improves Glucose Kinetics in Obese Adults: A Randomized-Controlled Trial.	Metabolism. 2018	29305946		0	-		-	-	-	-		PubMed	0	0
Changes in Gut Microbiota-Related Metabolites and Long-term Successful Weight Loss in Response to Weight-Loss Diets: The POUNDS Lost Trial.	Diabetes Care. 2018	29305401		0	-		-	-	-	-		PubMed	0	0
Type 2 Diabetes and Risk of Incident Cancers in China: A Prospective Study among 0.5 Million Chinese Adults.	Am J Epidemiol. 2018	29304221		0	-		-	-	-	-		PubMed	0	0
Functional magnetic resonance imaging reveals differences in brain activation in response to thermal stimuli in diabetic patients with and without diabetic peripheral neuropathy.	PLoS One. 2018	29304099		0	-		-	-	-	-		PubMed	0	0
Teaching an old scaffold new recognition tricks: oligopyrrolamide antagonists of IAPP aggregation.	Org Biomol Chem. 2018	29303519		0	-		-	-	-	-		PubMed	0	0
Increased myocardial extracellular volume assessed by cardiovascular magnetic resonance T1 mapping and its determinants in type 2 diabetes mellitus patients with normal myocardial systolic strain.	Cardiovasc Diabetol. 2018	29301529		0	-		-	-	-	-		PubMed	0	0
SGLT-2-inhibition with dapagliflozin reduces tissue sodium content: a randomised controlled trial.	Cardiovasc Diabetol. 2018	29301520		0	-		-	-	-	-		PubMed	0	0
High intensity exercise decreases IP6K1 muscle content & improves insulin sensitivity (SI2*) in glucose intolerant individuals.	J Clin Endocrinol Metab. 2017	29300979		0	-		-	-	-	-		PubMed	0	0
Curcuminoids plus piperine modulate adipokines in type 2 diabetes mellitus.	Curr Clin Pharmacol. 2018	29299989		0	-		-	-	-	-		PubMed	0	0
Idiopathic macular telangiectasis type 2 and co-existent diabetic retinopathy.	Int J Retina Vitreous. 2017	29299346		0	-		-	-	-	-		PubMed	0	0
100Â % Fruit juice and measures of glucose control and insulin sensitivity: a systematic review and meta-analysis of randomised controlled trials.	J Nutr Sci. 2017	29299307		0	-		-	-	-	-		PubMed	0	0
Effects of Pemafibrate, a Novel Selective PPARÎ± Modulator, on Lipid and Glucose Metabolism in Patients With Type 2 Diabetes and Hypertriglyceridemia: A Randomized, Double-Blind, Placebo-Controlled, Phase 3 Trial.	Diabetes Care. 2018	29298800		0	-		-	-	-	-		PubMed	0	0
Cultural adaptation of a peer-led lifestyle intervention program for diabetes prevention in India: the Kerala diabetes prevention program (K-DPP).	BMC Public Health. 2018	29298703		0	-		-	-	-	-		PubMed	0	0
Exploring heart failure events in contemporary cardiovascular outcomes trials in type 2 diabetes mellitus.	Expert Rev Cardiovasc Ther. 2018	29298108		0	-		-	-	-	-		PubMed	0	0
Canagliflozin and cardiovascular and renal events in type 2 diabetes.	Postgrad Med. 2018	29297732		0	-		-	-	-	-		PubMed	0	0
Should pregnant women be excluded from a community-based lifestyle intervention trial? A case study.	Reprod Health. 2017	29297356		0	-		-	-	-	-		PubMed	0	0
Ticks and salt: an atypical case of neuroborreliosis.	J Community Hosp Intern Med Perspect. 2017	29296248		0	-		-	-	-	-		PubMed	0	0
Macrophage activation marker sCD163 correlates with accelerated lipolysis following LPS exposure: a human-randomised clinical trial.	Endocr Connect. 2018	29295869		0	-		-	-	-	-		PubMed	0	0
The Need to Calculate Target Glucose Levels When Measuring Changes in Insulin Sensitivity During Interventions for Individuals With Type 2 Diabetes.	J Diabetes Sci Technol. 2018	29295634		0	-		-	-	-	-		PubMed	0	0
A meta-analysis of associations of LEPR Q223R and K109R polymorphisms with Type 2 diabetes risk.	PLoS One. 2018	29293570		0	-		-	-	-	-		PubMed	0	0
Insulin Pump and Continuous Glucose Monitor Initiation in Hospitalized Patients with Type 2 Diabetes Mellitus.	Diabetes Technol Ther. 2018	29293367		0	-		-	-	-	-		PubMed	0	0
Corrigendum to "Design and participant characteristics for a randomized effectiveness trial of an intensive lifestyle intervention to reduce cardiovascular risk in adults with type 2 diabetes: The I-D-HEALTH study" [Contemp. Clin. Trials 46 (2016) 114-121].	Contemp Clin Trials. 2018	29292045		0	-		-	-	-	-		PubMed	0	0
Determinants of weight outcomes in type 2 diabetes prevention intervention in primary health care setting (the DE-PLAN project).	BMC Public Health. 2018	29291708		0	-		-	-	-	-		PubMed	0	0
Impact of an integrated care program on glycemic control and cardiovascular risk factors in patients with type 2 diabetes in Saudi Arabia: an interventional parallel-group controlled study.	BMC Fam Pract. 2018	29291706		0	-		-	-	-	-		PubMed	0	0
Supervised Balance Training and Wii Fit-Based Exercises Lower Falls Risk in Older Adults With Type 2 Diabetes.	J Am Med Dir Assoc. 2018	29289541		0	-		-	-	-	-		PubMed	0	0
Immunogenicity of a two-dose investigational hepatitis B vaccine, HBsAg-1018, using a toll-like receptor 9 agonist adjuvant compared with a licensed hepatitis B vaccine in adults.	Vaccine. 2018	29289383		0	-		-	-	-	-		PubMed	0	0
The effect of 12 weeks of aerobic training on serum levels high sensitivity C-reactive protein, tumor necrosis factor-alpha, lipid profile and anthropometric characteristics in middle-age women patients with type 2 diabetes.	Diabetes Metab Syndr. 2017	29287840		0	-		-	-	-	-		PubMed	0	0
Targeting oxidative stress through antioxidants in diabetes mellitus.	J Drug Target. 2018	29285960		0	-		-	-	-	-		PubMed	0	0
Comparative effectiveness and safety of empagliflozin on cardiovascular mortality and morbidity in adults with type 2 diabetes.	Ann Transl Med. 2017	29285488		0	-		-	-	-	-		PubMed	0	0
Birth weight and type 2 diabetes: A meta-analysis.	Exp Ther Med. 2017	29285058		0	-		-	-	-	-		PubMed	0	0
Pharmacy Diabetes Screening Trial: protocol for a pragmatic cluster-randomised controlled trial to compare three screening methods for undiagnosed type 2 diabetes in Australian community pharmacy.	BMJ Open. 2017	29284715		0	-		-	-	-	-		PubMed	0	0
Optimizing Glycemic Control in Adults With Type 1 or Type 2 Diabetes Attending a Multidisciplinary Foot Clinic.	Can J Diabetes. 2017	29284562		0	-		-	-	-	-		PubMed	0	0
Chinese herbal medicine TangBi Formula treatment of patients with type 2 diabetic distal symmetric polyneuropathy disease: study protocol for a randomized controlled trial.	Trials. 2017	29284520		0	-		-	-	-	-		PubMed	0	0
Miscarried helping" in adults with Type 2 diabetes: Helping for Health Inventory-Couples.	Fam Syst Health. 2017	29283609		0	-		-	-	-	-		PubMed	0	0
A randomized controlled trial on the effect of behavioral strategies for adherence to oral antidiabetic drugs: study protocol.	Contemp Nurse. 2018	29281941		0	-		-	-	-	-		PubMed	0	0
Causal relationship of hepatic fat with liver damage and insulin resistance in nonalcoholic fatty liver.	J Intern Med. 2017	29280273		0	-		-	-	-	-		PubMed	0	0
No Evidence of Increase in Calcitonin Concentrations or Development of C-Cell Malignancy in Response to Liraglutide for Up to 5 Years in the LEADER Trial.	Diabetes Care. 2018	29279300		0	-		-	-	-	-		PubMed	0	0
Is metformin beneficial for heart failure in patients with type 2 diabetes?	Diabetes Res Clin Pract. 2018	29278713		0	-		-	-	-	-		PubMed	0	0
Efficacy and safety of adding liraglutide to existing insulin regimens in Japanese patients with typeÂ 2 diabetes mellitus: A post-hoc analysis of a phaseÂ 3 randomized clinical trial.	J Diabetes Investig. 2017	29277968		0	-		-	-	-	-		PubMed	0	0
Assessment of hypoglycaemia during basal insulin therapy: Temporal distribution and risk of events using a predefined or an expanded definition of nocturnal events.	Diabetes Metab. 2017	29277378		0	-		-	-	-	-		PubMed	0	0
The Divergent Cardiovascular Effects of ACE Inhibitors and ARBs in Patient With Type 2 Diabetes Mellitus.	Can J Diabetes. 2017	29277343		0	-		-	-	-	-		PubMed	0	0
Network meta-analysis of cardiovascular outcomes in randomized controlled trials of new antidiabetic drugs.	Int J Cardiol. 2018	29277321		0	-		-	-	-	-		PubMed	0	0
Digital Diabetes Management Application Improves Glycemic Outcomes in People With Type 1 and Type 2 Diabetes.	J Diabetes Sci Technol. 2017	29277103		0	-		-	-	-	-		PubMed	0	0
Prevalence of cardiovascular disease and evaluation of standard of care in type 2 diabetes: a nationwide study in primary care.	Cardiovasc Endocrinol. 2017	29276653		0	-		-	-	-	-		PubMed	0	0
Relevance of positive cardiovascular outcome trial results in clinical practice: perspectives from the Academy for Cardiovascular Risk, Outcomes and Safety Studies in Type 2 Diabetes (ACROSS T2D).	Ther Clin Risk Manag. 2017	29276388		0	-		-	-	-	-		PubMed	0	0
Melatonin administration lowers biomarkers of oxidative stress and cardio-metabolic risk in type 2 diabetic patients with coronary heart disease: A randomized, double-blind, placebo-controlled trial.	Clin Nutr. 2017	29275919		0	-		-	-	-	-		PubMed	0	0
The renoprotective effect and safety of a DPP-4 inhibitor, sitagliptin, at a small dose in type 2 diabetic patients with a renal dysfunction when changed from other DPP-4 inhibitors: REAL trial.	Clin Exp Nephrol. 2017	29275488		0	-		-	-	-	-		PubMed	0	0
Randomized Trial of the Effects of Insulin and Metformin on Myocardial Injury and Stress in Diabetes Mellitus: A Post Hoc Exploratory Analysis.	J Am Heart Assoc. 2017	29275373		0	-		-	-	-	-		PubMed	0	0
Lack of Longitudinal Association Between Thiazolidinediones and Incidence and Progression of Diabetic Eye Disease: The ACCORD Eye Study.	Am J Ophthalmol. 2017	29275147		0	-		-	-	-	-		PubMed	0	0
Mediterranean diet improves endothelial function in patients with diabetes and prediabetes: A report from the CORDIOPREV study.	Atherosclerosis. 2018	29274507		0	-		-	-	-	-		PubMed	0	0
Impact of Cranberry Juice Enriched with Omega-3 Fatty Acids Adjunct with Nonsurgical Periodontal Treatment on Metabolic Control and Periodontal Status in Type 2 Patients with Diabetes with Periodontal Disease.	J Am Coll Nutr. 2018	29272211		0	-		-	-	-	-		PubMed	0	0
Long-term effects on glycaemic control and Î²-cell preservation of early intensive treatment in patients with newly diagnosed type 2 diabetes: A multicentre randomized trial.	Diabetes Obes Metab. 2017	29272062		0	-		-	-	-	-		PubMed	0	0
Calculating individualized glycaemic targets using an algorithm based on expert worldwide diabetologists: Implications in real-life clinical practice.	Diabetes Metab Res Rev. 2017	29271560		0	-		-	-	-	-		PubMed	0	0
Development and Qualification of a Drug-Disease Modeling Platform to Characterize Clinically Relevant Endpoints in Type 2 Diabetes Trials.	Clin Pharmacol Ther. 2017	29271001		0	-		-	-	-	-		PubMed	0	0
Long-Term Effectiveness of Liraglutide for Treatment of Type 2 Diabetes in a Real-Life Setting: A 24-Month, Multicenter, Non-interventional, Retrospective Study.	Adv Ther. 2018	29270781		0	-		-	-	-	-		PubMed	0	0
Twelve-month outcomes of a randomized trial of a moderate-carbohydrate versus very low-carbohydrate diet in overweight adults with type 2 diabetes mellitus or prediabetes.	Nutr Diabetes. 2017	29269731		0	-		-	-	-	-		PubMed	0	0
Prospective, Cluster-Randomized Trial to Implement the Ottawa Model for Smoking Cessation in Diabetes Education Programs in Ontario, Canada.	Diabetes Care. 2018	29269509		0	-		-	-	-	-		PubMed	0	0
Adherence to self-care practices and empowerment of people with diabetes mellitus: a randomized clinical trial.	Rev Esc Enferm USP. 2017	29267737		0	-		-	-	-	-		PubMed	0	0
Comparison of education group strategies and home visits in type 2 diabetes mellitus: clinical trial.	Rev Lat Am Enfermagem. 2017	29267547		0	-		-	-	-	-		PubMed	0	0
Powerful diuretics: A common denominator in landmark hypertension and type 2 diabetes mellitus trials.	J Clin Hypertens (Greenwich). 2018	29265730		0	-		-	-	-	-		PubMed	0	0
Benefits of non-surgical periodontal treatment in patients with type 2 diabetes mellitus and chronic periodontitis: A randomized controlled trial.	J Clin Periodontol. 2018	29265454		0	-		-	-	-	-		PubMed	0	0
Subgroup Analysis Stratified by Baseline Pancreatic Î²-cell Function in a Japanese Study of Dulaglutide in Patients with Type 2 Diabetes.	Diabetes Ther. 2018	29264713		0	-		-	-	-	-		PubMed	0	0
Ethnic Differences in Efficacy and Safety of Alogliptin: A Systematic Review and Meta-Analysis.	Diabetes Ther. 2018	29264712		0	-		-	-	-	-		PubMed	0	0
Cardiovascular Outcomes Trials in Type 2 Diabetes: Where Do We Go From Here? Reflections From a Diabetes Care Editors' Expert Forum.	Diabetes Care. 2018	29263194		0	-		-	-	-	-		PubMed	0	0
Lower Risk of Death With SGLT2 Inhibitors in Observational Studies: Real or Bias?	Diabetes Care. 2018	29263192		0	-		-	-	-	-		PubMed	0	0
User Experience of an Innovative Mobile Health Program to Assist in Insulin Dose Adjustment: Outcomes of a Proof-of-Concept Trial.	Telemed J E Health. 2017	29261476		0	-		-	-	-	-		PubMed	0	0
Novel Mixed-Type Inhibitors of Protein Tyrosine Phosphatase 1B. Kinetic and Computational Studies.	Molecules. 2017	29261102		0	-		-	-	-	-		PubMed	0	0
New treatment options for lipid-lowering therapy in subjects with type 2 diabetes.	Acta Diabetol. 2018	29260404		0	-		-	-	-	-		PubMed	0	0
Effects of Immunocytokine Combined with Cattle Encephalon Glycoside and Ignotin on CTGF, HO-1 and NT-3 in Patients with Type 2 Diabetic Peripheral Neuropathy.	Iran J Public Health. 2017	29259937		0	-		-	-	-	-		PubMed	0	0
Preliminary evidence supports circulating microRNAs as prognostic biomarkers for type 2 diabetes.	Obes Sci Pract. 2017	29259803		0	-		-	-	-	-		PubMed	0	0
The effect of phosphodiesterase-5 inhibitors on cerebral blood flow in humans: A systematic review.	J Cereb Blood Flow Metab. 2018	29256324		0	-		-	-	-	-		PubMed	0	0
Diabetes Mellitus Management Among Patients with Limited English Proficiency: A Systematic Review and Meta-Analysis.	J Gen Intern Med. 2017	29256089		0	-		-	-	-	-		PubMed	0	0
A Paleolithic Diet with and without Combined Aerobic and Resistance Exercise Increases Functional Brain Responses and Hippocampal Volume in Subjects with Type 2 Diabetes.	Front Aging Neurosci. 2017	29255413		0	-		-	-	-	-		PubMed	0	0
DPP-4 Inhibitors Improve Diabetic Wound Healing via Direct and Indirect Promotion of Epithelial-Mesenchymal Transition and Reduction of Scarring.	Diabetes. 2018	29254987		0	-		-	-	-	-		PubMed	0	0
Nil Whey Protein Effect on Glycemic Control after Intense Mixed-Mode Training in Type 2 Diabetes.	Med Sci Sports Exerc. 2018	29251686		0	-		-	-	-	-		PubMed	0	0
Androgen receptor overexpression in prostate cancer in type 2 diabetes.	Mol Metab. 2018	29249638		0	-		-	-	-	-		PubMed	0	0
A comparison of the effects of low- and high-dose atorvastatin on lipoprotein metabolism and inflammatory cytokines in type 2 diabetes: Results from the Protection Against Nephropathy in Diabetes with Atorvastatin (PANDA) randomized trial.	J Clin Lipidol. 2018	29246729		0	-		-	-	-	-		PubMed	0	0
Cardiac Biomarkers in Youth with Type 2 Diabetes Mellitus: Results from the TODAY Study.	J Pediatr. 2018	29246363		0	-		-	-	-	-		PubMed	0	0
Impact of a structured multicomponent educational intervention program on metabolic control of patients with type 2 diabetes.	BMC Endocr Disord. 2017	29246139		0	-		-	-	-	-		PubMed	0	0
The Mediterranean diet: metabolic and molecular mechanisms.	J Gerontol A Biol Sci Med Sci. 2017	29244059		0	-		-	-	-	-		PubMed	0	0
The GSTM1 and GSTT1 null genotypes increase the risk for Type 2 diabetes mellitus and the subsequent development of diabetic complications: A meta-analysis.	Curr Diabetes Rev. 2017	29243583		0	-		-	-	-	-		PubMed	0	0
Effect of Dipeptidyl Peptidase-4 Inhibitors on Heart Failure: A Network Meta-Analysis.	Value Health. 2017	29241903		0	-		-	-	-	-		PubMed	0	0
Incremental Costs and Cost Effectiveness of Intensive Treatment in Individuals with Type 2 Diabetes Detected by Screening in the ADDITION-UK Trial: An Update with Empirical Trial-Based Cost Data.	Value Health. 2017	29241888		0	-		-	-	-	-		PubMed	0	0
Change in Hemoglobin Trajectory and Darbepoetin Dose Approaching End-Stage Renal Disease: Data from the Trial to Reduce Cardiovascular Events with Aranesp Therapy Trial.	Am J Nephrol. 2017	29241199		0	-		-	-	-	-		PubMed	0	0
Hyperthyroxinemia is positively associated with prevalent and incident type 2 diabetes mellitus in two population-based samples from Northeast Germany and Denmark.	Nutr Metab Cardiovasc Dis. 2018	29239740		0	-		-	-	-	-		PubMed	0	0
Renal Function During an Open-Label Prospective Observational Trial of Sitagliptin in Patients With Diabetes: A Sub-Analysis of the JAMP Study.	J Clin Med Res. 2018	29238432		0	-		-	-	-	-		PubMed	0	0
Cardioprotective anti-hyperglycaemic medications: a review of clinical trials.	Eur Heart J. 2017	29236983		0	-		-	-	-	-		PubMed	0	0
An Indirect Comparison of Changes in the Impact of Weight on Quality of Life Among Subjects with Type 2 Diabetes Treated with Antihyperglycemic Agents in Dual Therapy with Metformin.	Diabetes Ther. 2018	29236222		0	-		-	-	-	-		PubMed	0	0
Testosterone level and risk of type 2 diabetes in men: a systematic review and meta-analysis.	Endocr Connect. 2018	29233816		0	-		-	-	-	-		PubMed	0	0
Mobile Health Technology (mDiab) for the Prevention of Type 2 Diabetes: Protocol for a Randomized Controlled Trial.	JMIR Res Protoc. 2017	29233806		0	-		-	-	-	-		PubMed	0	0
Hyperuricemia and metabolic syndrome in type 2 diabetes mellitus patients at Hawassa university comprehensive specialized hospital, South West Ethiopia.	BMC Endocr Disord. 2017	29233152		0	-		-	-	-	-		PubMed	0	0
Effects of Weight Loss on Advanced Glycation End Products in Subjects with and without Diabetes: A Preliminary Report.	Int J Environ Res Public Health. 2017	29232895		0	-		-	-	-	-		PubMed	0	0
Utility of HbA(1c) and fasting plasma glucose for screening of Type 2 diabetes: a meta-analysis of full ROC curves.	Diabet Med. 2018	29230866		0	-		-	-	-	-		PubMed	0	0
Peri-operative management of patients with type-2 diabetes mellitus undergoing non-cardiac surgery using liraglutide, glucose-insulin-potassium infusion or intravenous insulin bolus regimens: a randomised controlled trial.	Anaesthesia. 2018	29230803		0	-		-	-	-	-		PubMed	0	0
Effect of whole milk compared with skimmed milk on fasting blood lipids in healthy adults: a 3-week randomized crossover study.	Eur J Clin Nutr. 2018	29229955		0	-		-	-	-	-		PubMed	0	0
Protocol for the specialist supervised individualised multifactorial treatment of new clinically diagnosed type 2 diabetes in general practice (IDA): a prospective controlled multicentre open-label intervention study.	BMJ Open. 2017	29229652		0	-		-	-	-	-		PubMed	0	0
Effects of a multi-strain probiotic supplement for 12Â weeks in circulating endotoxin levels and cardiometabolic profiles of medication naÃ¯ve T2DM patients: a randomized clinical trial.	J Transl Med. 2017	29228964		0	-		-	-	-	-		PubMed	0	0
An insulin resistance associated neural correlate of impulsivity in type 2 diabetes mellitus.	PLoS One. 2017	29228027		0	-		-	-	-	-		PubMed	0	0
Comparative effectiveness of metformin monotherapy in extended release and immediate release formulations for the treatment of type 2 diabetes in treatment-naÃ¯ve Chinese patients: Analysis of results from the CONSENT trial.	Diabetes Obes Metab. 2017	29227571		0	-		-	-	-	-		PubMed	0	0
Sex hormone binding globulin - an important biomarker for predicting PCOS risk: A systematic review and meta-analysis.	Syst Biol Reprod Med. 2018	29227165		0	-		-	-	-	-		PubMed	0	0
Histologic regression of fibrillary glomerulonephritis: the first report of biopsy-proven spontaneous resolution of disease.	Clin Kidney J. 2017	29225801		0	-		-	-	-	-		PubMed	0	0
Antidiabetic Polypill Improves Central Pathology and Cognitive Impairment in a Mixed Model of Alzheimer's Disease and Type 2 Diabetes.	Mol Neurobiol. 2017	29224179		0	-		-	-	-	-		PubMed	0	0
Response to Pioglitazone in Patients With Nonalcoholic Steatohepatitis With vs Without Type 2 Diabetes.	Clin Gastroenterol Hepatol. 2017	29223443		0	-		-	-	-	-		PubMed	0	0
Insulin degrading enzyme contributes to the pathology in a mixed model of Type 2 diabetes and Alzheimer's disease: possible mechanisms of IDE in T2D and AD.	Biosci Rep. 2018	29222348		0	-		-	-	-	-		PubMed	0	0
Primary care-led weight management for remission of type 2 diabetes (DiRECT): an open-label, cluster-randomised trial.	Lancet. 2017	29221645		0	-		-	-	-	-		PubMed	0	0
Peer Education Group Intervention to Reduce Psychological Insulin Resistance: A Pilot Mixed-Method Study in a Chinese Population.	Diabetes Ther. 2018	29218568		0	-		-	-	-	-		PubMed	0	0
Intensive dietary intervention promoting the Mediterranean diet in people with high cardiometabolic risk: a non-randomized study.	Acta Diabetol. 2018	29218417		0	-		-	-	-	-		PubMed	0	0
The Impact of a Mobile Diabetes Health Intervention on Diabetes Distress and Depression Among Adults: Secondary Analysis of a Cluster Randomized Controlled Trial.	JMIR Mhealth Uhealth. 2017	29217502		0	-		-	-	-	-		PubMed	0	0
Socio-demographic determinants and effect of structured personal diabetes care: a 19-year follow-up of the randomized controlled study diabetes Care in General Practice (DCGP).	BMC Endocr Disord. 2017	29216868		0	-		-	-	-	-		PubMed	0	0
A randomized controlled trial of Roux-en-Y gastrojejunostomy vs. gastroduodenostomy with respect to the improvement of type 2 diabetes mellitus after distal gastrectomy in gastric cancer patients.	PLoS One. 2017	29216250		0	-		-	-	-	-		PubMed	0	0
A genetic risk score for fasting plasma glucose is independently associated with arterial stiffness: a Mendelian randomization study.	J Hypertens. 2017	29215398		0	-		-	-	-	-		PubMed	0	0
Complex Assessment of Metabolic Effectiveness of Insulin Pump Therapy in Patients with Type 2 Diabetes Beyond HbA1c Reduction.	Diabetes Technol Ther. 2018	29215299		0	-		-	-	-	-		PubMed	0	0
Dapagliflozin as add-on therapy in Asian patients with type 2 diabetes inadequately controlled on insulin with or without oral antihyperglycemic drugs: A randomized controlled trial.	J Diabetes. 2017	29215189		0	-		-	-	-	-		PubMed	0	0
Serum Antioxidant Parameters are Significantly Increased in Patients with Type 2 Diabetes Mellitus after Consumption of Chinese Propolis: A Randomized Controlled Trial Based on Fasting Serum Glucose Level.	Diabetes Ther. 2018	29214374		0	-		-	-	-	-		PubMed	0	0
Latent autoimmune diabetes of adulthood: case report.	Clin Diabetes Endocrinol. 2017	29214049		0	-		-	-	-	-		PubMed	0	0
Dipeptidyl Peptidase-4 Inhibitors Use and Relative Risk of Ischemic Cerebrovascular Disease in Type 2 Diabetic Patients in a Case-Control Study.	Front Pharmacol. 2017	29213240		0	-		-	-	-	-		PubMed	0	0
Intensive Blood Pressure Lowering in Patients With and Patients Without Type 2 Diabetes: A Pooled Analysis From Two Randomized Trials.	Diabetes Care. 2017	29212825		0	-		-	-	-	-		PubMed	0	0
Nurse health and lifestyle modification versus standard care in 40 to 70 year old regional adults: study protocol of the Management to Optimise Diabetes and mEtabolic syndrome Risk reduction via Nurse-led intervention (MODERN) randomized controlled trial.	BMC Health Serv Res. 2017	29212477		0	-		-	-	-	-		PubMed	0	0
Efficacy and safety of sotagliflozin in treating diabetes type 1.	Expert Opin Pharmacother. 2018	29212386		0	-		-	-	-	-		PubMed	0	0
Association of Social Support and Medication Adherence in Chinese Patients with Type 2 Diabetes Mellitus.	Int J Environ Res Public Health. 2017	29211039		0	-		-	-	-	-		PubMed	0	0
The association between cardiovascular disease and type 2 diabetes in adults with atopic dermatitis: a systematic review and meta-analysis.	Br J Dermatol. 2017	29210061		0	-		-	-	-	-		PubMed	0	0
Effects of Intensive Control of Glycemia on Clinical Kidney Outcomes in Type 2 Diabetes Patients Compared with Standard Control: A Meta-Analysis.	Front Pharmacol. 2017	29209216		0	-		-	-	-	-		PubMed	0	0
The impact of acute bouts of interval and continuous walking on energy-intake and appetite regulation in subjects with type 2 diabetes.	Physiol Rep. 2017	29208688		0	-		-	-	-	-		PubMed	0	0
Advanced Glycation End Products, Oxidation Products, and Incident Cardiovascular Events in Patients With Type 2 Diabetes.	Diabetes Care. 2018	29208654		0	-		-	-	-	-		PubMed	0	0
Retrospective, multicohort analysis of the Clinical Practice Research Datalink (CPRD) to determine differences in the cost of medication wastage, dispensing fees and prescriber time of issuing either short (<60 days) or long (â‰¥60 days) prescription lengths in primary care for common, chronic conditi...	BMJ Open. 2017	29208621		0	-		-	-	-	-		PubMed	0	0
One year follow-up after a randomized controlled trial of a 130 g/day low-carbohydrate diet in patients with type 2 diabetes mellitus and poor glycemic control.	PLoS One. 2017	29206237		0	-		-	-	-	-		PubMed	0	0
Association between short and long sleep durations and cardiovascular outcomes: a systematic review and meta-analysis.	Eur Heart J Acute Cardiovasc Care. 2017	29206050		0	-		-	-	-	-		PubMed	0	0
Publication trends in obstructive sleep apnea: Evidence of need for more evidence.	World J Otorhinolaryngol Head Neck Surg. 2017	29204582		0	-		-	-	-	-		PubMed	0	0
Effect of a vitamin and mineral supplementation on glycemic status: Results from a community-based program.	J Clin Transl Endocrinol. 2017	29204369		0	-		-	-	-	-		PubMed	0	0
Patients' views on interactions with practitioners for type 2 diabetes: a longitudinal qualitative study in primary care over 10 years.	Br J Gen Pract. 2018	29203681		0	-		-	-	-	-		PubMed	0	0
Increasing prevalence of type 2 diabetes mellitus and impact of ethnicity in north Sudan.	Diabetes Res Clin Pract. 2018	29203255		0	-		-	-	-	-		PubMed	0	0
Diabetes mellitus doubles the risk of type 2 cardiorenal syndrome: results from the NHANES trial.	Hellenic J Cardiol. 2017	29203162		0	-		-	-	-	-		PubMed	0	0
Efficacy, safety and influencing factors of intra-calf muscular injection of bone marrow mononuclear cells in the treatment of type 2 diabetes mellitus-induced lower extremity vascular disease.	Exp Ther Med. 2017	29201234		0	-		-	-	-	-		PubMed	0	0
Myocardial injury in diabetic patients with multivessel coronary artery disease after revascularization interventions.	Diabetol Metab Syndr. 2017	29201152		0	-		-	-	-	-		PubMed	0	0
A comparative study of Shilajatu and Asanadi Ghana Vati in the management of Madhumeha w.s.r. to type-2 diabetes mellitus.	Ayu. 2016	29200750		0	-		-	-	-	-		PubMed	0	0
Effects of a Dipeptidyl Peptidase 4 Inhibitor Sitagliptin on Glycemic Control and Lipoprotein Metabolism in Patients with Type 2 Diabetes Mellitus (GLORIA Trial).	J Atheroscler Thromb. 2017	29199201		0	-		-	-	-	-		PubMed	0	0
Cardiovascular benefits of combined interval training and post-exercise nutrition in type 2 diabetes.	J Diabetes Complications. 2018	29198993		0	-		-	-	-	-		PubMed	0	0
Liraglutide and Metformin alone or combined therapy for type 2 diabetes patients complicated with coronary artery disease.	Lipids Health Dis. 2017	29197387		0	-		-	-	-	-		PubMed	0	0
Risk Assessment in Patients With Diabetes With the TIMI Risk Score for Atherothrombotic Disease.	Diabetes Care. 2018	29196298		0	-		-	-	-	-		PubMed	0	0
Effects of pioglitazoneÂ treatment on blood leptin levels in patients with typeÂ 2 diabetes.	J Diabetes Investig. 2017	29194996		0	-		-	-	-	-		PubMed	0	0
Incretin-based therapies and risk of pancreatic cancer in patients with type 2 diabetes: a meta-analysis of randomised controlled trials.	Diabetes Obes Metab. 2017	29193572		0	-		-	-	-	-		PubMed	0	0
The associations of illness perception with metabolic control (HbA1c) among type 2 diabetes mellitus patients in a district hospital.	Int J Pharm Pract. 2017	29193388		0	-		-	-	-	-		PubMed	0	0
Meta-analysis for the comparison of two diagnostic tests-A new approach based on copulas.	Stat Med. 2018	29193212		0	-		-	-	-	-		PubMed	0	0
Behavioural and anthropometric risk factors for diabetes mellitus among newly admitted undergraduates in a Nigerian University.	Niger J Clin Pract. 2017	29192627		0	-		-	-	-	-		PubMed	0	0
Adequacy of control of cardiovascular risk factors in ambulatory patients with type 2 diabetes attending diabetes out-patients clinic at a county hospital, Kenya.	BMC Endocr Disord. 2017	29191193		0	-		-	-	-	-		PubMed	0	0
Smoking and the risk of diabetic nephropathy in patients with type 1 and type 2 diabetes: a meta-analysis of observational studies.	Oncotarget. 2017	29190990		0	-		-	-	-	-		PubMed	0	0
Combined serum free light chain levels are associated with carotid atherosclerosis in type 2 diabetes mellitus.	Diab Vasc Dis Res. 2017	29189047		0	-		-	-	-	-		PubMed	0	0
Clinical and metabolic features of the randomised controlled Diabetes Remission Clinical Trial (DiRECT) cohort.	Diabetologia. 2017	29188339		0	-		-	-	-	-		PubMed	0	0
Effect of Roux-en-Y Bariatric Surgery on Lipoproteins, Insulin Resistance, and Systemic and Vascular Inflammation in Obesity and Diabetes.	Front Immunol. 2017	29187850		0	-		-	-	-	-		PubMed	0	0
Dietary interventions to prevent and manage diabetes in worksite settings: a meta-analysis.	J Occup Health. 2018	29187673		0	-		-	-	-	-		PubMed	0	0
Glycemic control and adipokines after periodontal therapy in patients with Type 2 diabetes and chronic periodontitis.	Braz Oral Res. 2017	29185604		0	-		-	-	-	-		PubMed	0	0
Effects on Subclinical Heart Failure in Type 2 Diabetic Subjects on Liraglutide Treatment vs. Glimepiride Both in Combination with Metformin: A Randomized Open Parallel-Group Study.	Front Endocrinol (Lausanne). 2017	29184539		0	-		-	-	-	-		PubMed	0	0
Predictors of Quality of Life and Other Patient-Reported Outcomes in the PANORAMA Multinational Study of People With Type 2 Diabetes.	Diabetes Care. 2018	29183910		0	-		-	-	-	-		PubMed	0	0
Effect of Chronic Liraglutide Therapy and its Withdrawal on Time to Post-challenge Peak Glucose in Patients with Type 2 Diabetes.	Am J Physiol Endocrinol Metab. 2017	29183873		0	-		-	-	-	-		PubMed	0	0
Original paper: Efficacy and safety analysis of insulin degludec/insulin aspart compared with biphasic insulin aspart 30: A phase 3, multicentre, international, open-label, randomised, treat-to-target trial in patients with type 2 diabetes fasting during Ramadan.	Diabetes Res Clin Pract. 2018	29183844		0	-		-	-	-	-		PubMed	0	0
Interaction between TCF7L2 polymorphism and dietary fat intake on high density lipoprotein cholesterol.	PLoS One. 2017	29182660		0	-		-	-	-	-		PubMed	0	0
Twitter-derived neighborhood characteristics associated with obesity and diabetes.	Sci Rep. 2017	29180792		0	-		-	-	-	-		PubMed	0	0
Young onset type 2 diabetic patients might be more sensitive to metformin compared to late onset type 2 diabetic patients.	Sci Rep. 2017	29180640		0	-		-	-	-	-		PubMed	0	0
Proprotein Convertase Subtilisin/Kexin Type 9 (PCSK9) Inhibitors and Incident Type 2 Diabetes: A Systematic Review and Meta-analysis With Over 96,000 Patient-Years.	Diabetes Care. 2018	29180351		0	-		-	-	-	-		PubMed	0	0
Glycaemic responses in Asian and non-Asian people with type 2 diabetes initiating insulin glargine 100â€¯units/mL: A patient-level pooled analysis of 16 randomised controlled trials.	Diabetes Res Clin Pract. 2018	29179974		0	-		-	-	-	-		PubMed	0	0
Effects of an energy-restricted low-carbohydrate, high unsaturated fat/low saturated fat diet versus a high carbohydrate, low fat diet in type 2 diabetes: a 2 year randomized clinical trial.	Diabetes Obes Metab. 2017	29178536		0	-		-	-	-	-		PubMed	0	0
Semaglutide, reduction in HbA(1c) and the risk of diabetic retinopathy.	Diabetes Obes Metab. 2017	29178519		0	-		-	-	-	-		PubMed	0	0
Community Program Improves Quality of Life and Self-Management in Older Adults with Diabetes Mellitus and Comorbidity.	J Am Geriatr Soc. 2018	29178317		0	-		-	-	-	-		PubMed	0	0
Effect of regular exercise training on changes in HbA1c, BMI and VO(2)max among patients with type 2 diabetes mellitus: an 8-year trial.	BMJ Open Diabetes Res Care. 2017	29177050		0	-		-	-	-	-		PubMed	0	0
Author Correction: Dipeptidyl peptidase-4 inhibitors and cancer risk in patients with type 2 diabetes: a meta-analysis of randomized clinical trials.	Sci Rep. 2017	29176726		0	-		-	-	-	-		PubMed	0	0
Long-term treatment with metformin in type 2 diabetes and methylmalonic acid: Post hoc analysis of a randomized controlled 4.3year trial.	J Diabetes Complications. 2018	29174300		0	-		-	-	-	-		PubMed	0	0
The Impact of Burst Exercise on Cardiometabolic Status of Patients Newly Diagnosed With Type 2 Diabetes.	Can J Cardiol. 2017	29173604		0	-		-	-	-	-		PubMed	0	0
Effects of supervised structured aerobic exercise training programme on level of Exertion, dyspnoea, VO2 max and Body Mass Index in patients with type 2 diabetes mellitus.	J Pak Med Assoc. 2017	29171557		0	-		-	-	-	-		PubMed	0	0
Randomized, double-blind, placebo-controlled dose-finding study of the dipeptidyl peptidase-4 inhibitor linagliptin in pediatric patients with type 2 diabetes.	Pediatr Diabetes. 2017	29171139		0	-		-	-	-	-		PubMed	0	0
Testosterone therapy for sexual dysfunction in men with Type 2 diabetes: a systematic review and meta-analysis of randomized controlled trials.	Diabet Med. 2018	29171080		0	-		-	-	-	-		PubMed	0	0
The association of unemployment with glucose metabolism: a systematic review and meta-analysis.	Int J Public Health. 2017	29170882		0	-		-	-	-	-		PubMed	0	0
Reduction of Cognitive Decline in Patients with or at High Risk for Diabetes.	Curr Geriatr Rep. 2017	29170725		0	-		-	-	-	-		PubMed	0	0
Gastric Contractility Modulation - a novel method for the treatment of type 2 diabetes mellitus and obesity.	Endokrynol Pol. 2017	29168547		0	-		-	-	-	-		PubMed	0	0
Are Eating Disorders Risk Factors for Type 2 Diabetes? A Systematic Review and Meta-analysis.	Curr Diab Rep. 2017	29168047		0	-		-	-	-	-		PubMed	0	0
Glucagon-like peptide-1 mimetics, optimal for Asian type 2 diabetes patients with and without overweight/obesity: meta-analysis of randomized controlled trials.	Sci Rep. 2017	29167470		0	-		-	-	-	-		PubMed	0	0
The Association Between the Dosage of SGLT2 Inhibitor and Weight Reduction in Type 2 Diabetes Patients: A Meta-Analysis.	Obesity (Silver Spring). 2018	29165885		0	-		-	-	-	-		PubMed	0	0
Prevalence of Hypothyroidism and Its Association with Diabetes Mellitus in Patients of an Ambulatory Clinic.	Bol Asoc Med P R. 2016	29165670		0	-		-	-	-	-		PubMed	0	0
An indirect treatment comparison of the efficacy of insulin degludec/liraglutide (IDegLira) and insulin glargine/lixisenatide (iGlarLixi) in patients with type 2 diabetes uncontrolled on basal insulin.	J Med Econ. 2017	29164973		0	-		-	-	-	-		PubMed	0	0
Residual renal and cardiovascular disease risk in conventionally-treated patients with type 2 diabetes: the potential of non-traditional biomarkers and treatments related redox metabolism.	Minerva Med. 2017	29164839		0	-		-	-	-	-		PubMed	0	0
Individuals with Type 1 and Type 2 Diabetes Mellitus Trade Increased Hyperglycemia for Decreased Hypoglycemia When Glycemic Variability is not Improved.	Diabetes Ther. 2018	29164512		0	-		-	-	-	-		PubMed	0	0
Glucose variability for cardiovascular risk factors in type 2 diabetes: a meta-analysis.	J Diabetes Metab Disord. 2017	29164077		0	-		-	-	-	-		PubMed	0	0
Effects of pioglitazone therapy on blood parameters, weight and BMI: a meta-analysis.	Diabetol Metab Syndr. 2017	29163673		0	-		-	-	-	-		PubMed	0	0
Small Ubiquitin-Like Modifier 4 (SUMO4) Gene M55V Polymorphism and Type 2 Diabetes Mellitus: A Meta-analysis Including 6,823 Subjects.	Front Endocrinol (Lausanne). 2017	29163370		0	-		-	-	-	-		PubMed	0	0
Diet Behavior Change Techniques in Type 2 Diabetes: A Systematic Review and Meta-analysis.	Diabetes Care. 2017	29162585		0	-		-	-	-	-		PubMed	0	0
The PNPLA3 I148M variant is associated with transaminase elevations in type 2 diabetes patients treated with basal insulin peglispro.	Pharmacogenomics J. 2017	29160303		0	-		-	-	-	-		PubMed	0	0
Glyoxalase 1 Modulation in Obesity and Diabetes.	Antioxid Redox Signal. 2018	29160087		0	-		-	-	-	-		PubMed	0	0
Long-term impact of intensive lifestyle intervention on cognitive function assessed with the National Institutes of Health Toolbox: The Look AHEAD study.	Alzheimers Dement (Amst). 2018	29159267		0	-		-	-	-	-		PubMed	0	0
Use of an integrated strip-free blood glucose monitoring system increases frequency of self-monitoring and improves glycemic control: Results from the ExAct study.	J Clin Transl Endocrinol. 2014	29159096		0	-		-	-	-	-		PubMed	0	0
Comparison of plantar pressure in three types of insole given to patients with diabetes at risk of developing foot ulcers - A two-year, randomized trial.	J Clin Transl Endocrinol. 2014	29159093		0	-		-	-	-	-		PubMed	0	0
Insulin Sensitivity and Diabetic Kidney Disease in Children and Adolescents With Type 2 Diabetes: An Observational Analysis of Data From the TODAY ClinicalÂ Trial.	Am J Kidney Dis. 2018	29157731		0	-		-	-	-	-		PubMed	0	0
Using molecular functional networks to manifest connections between obesity and obesity-related diseases.	Oncotarget. 2017	29156709		0	-		-	-	-	-		PubMed	0	0
Severe Hypoglycemia Caused by Lenalidomide.	Pharmacotherapy. 2018	29155440		0	-		-	-	-	-		PubMed	0	0
HbA1c monitoring interval in patients on treatment for stable type 2 diabetes. A ten-year retrospective, open cohort study.	Diabetes Res Clin Pract. 2018	29155151		0	-		-	-	-	-		PubMed	0	0
Sex Differences in the Psychometric Properties of the Pittsburgh Sleep Quality Index.	J Womens Health (Larchmt). 2017	29154713		0	-		-	-	-	-		PubMed	0	0
Diabetes News.	J Diabetes. 2017	29154404		0	-		-	-	-	-		PubMed	0	0
Nigella sativa improves glucose homeostasis and serum lipids in type 2 diabetes: A systematic review and meta-analysis.	Complement Ther Med. 2017	29154069		0	-		-	-	-	-		PubMed	0	0
Longitudinal Estimated GFR Trajectories in Patients With and Without Type 2 Diabetes and Nephropathy.	Am J Kidney Dis. 2018	29153995		0	-		-	-	-	-		PubMed	0	0
Bariatric Surgery: A Perspective for Primary Care.	Diabetes Spectr. 2017	29151717		0	-		-	-	-	-		PubMed	0	0
Effect of treatment of iron deficiency anemia onhemoglobin A1c in type 2 diabetic patients	Turk J Med Sci. 2017	29151315		0	-		-	-	-	-		PubMed	0	0
Family behaviours that have an impact on the self-management activities of adults living with Type 2 diabetes: a systematic review and meta-synthesis.	Diabet Med. 2018	29150863		0	-		-	-	-	-		PubMed	0	0
Cost-effectiveness of the psycho-educational blended (group and online) intervention HypoAware compared with usual care for people with Type 1 and insulin-treated Type 2 diabetes with problematic hypoglycaemia: analyses of a cluster-randomized controlled trial.	Diabet Med. 2018	29150861		0	-		-	-	-	-		PubMed	0	0
Impact of prolonged overfeeding on skeletal muscle mitochondria in healthy individuals.	Diabetologia. 2018	29150696		0	-		-	-	-	-		PubMed	0	0
Effect of Long-term Incretin-Based Therapies on Ischemic Heart Diseases in Patients with Type 2 Diabetes Mellitus: A Network Meta-analysis.	Sci Rep. 2017	29150631		0	-		-	-	-	-		PubMed	0	0
Effectiveness of a patient-centred, empowerment-based intervention programme among patients with poorly controlled type 2 diabetes: A randomised controlled trial.	Int J Nurs Stud. 2017	29149618		0	-		-	-	-	-		PubMed	0	0
Substantial improvement in HbA1c following a treatment and teaching programme for people with type 2 diabetes on conventional insulin therapy in an in- and outpatient setting.	Acta Diabetol. 2018	29149381		0	-		-	-	-	-		PubMed	0	0
The effect of educational intervention on weight loss in adolescents with overweight and obesity: Application of the theory of planned behavior.	ARYA Atheroscler. 2017	29147128		0	-		-	-	-	-		PubMed	0	0
A randomised controlled trial of a duodenal-jejunal bypass sleeve device (EndoBarrier) compared with standard medical therapy for the management of obese subjects with type 2 diabetes mellitus.	BMJ Open. 2017	29146657		0	-		-	-	-	-		PubMed	0	0
Preventing type 2 diabetes: systematic review of studies of cost-effectiveness of lifestyle programmes and metformin, with and without screening, for pre-diabetes.	BMJ Open. 2017	29146638		0	-		-	-	-	-		PubMed	0	0
Depressive symptoms and glycemic control in youth with type 2 diabetes participating in the TODAY clinical trial.	Diabetes Res Clin Pract. 2018	29146120		0	-		-	-	-	-		PubMed	0	0
Addressing geographic confounding through spatial propensity scores: a study of racial disparities in diabetes.	Stat Methods Med Res. 2017	29145767		0	-		-	-	-	-		PubMed	0	0
Inverse Association of Peripheral Orexin-A with Insulin Resistance in Type 2 Diabetes Mellitus: A Randomized Clinical Trial.	Rev Diabet Stud. 2017	29145540		0	-		-	-	-	-		PubMed	0	0
The effects of non-surgical periodontal treatment on glycemic control, oxidative stress balance and quality of life in patients with type 2 diabetes: A randomized clinical trial.	PLoS One. 2017	29145468		0	-		-	-	-	-		PubMed	0	0
Comparison of Efficacy and Safety of Liraglutide 3.0 mg in Individuals with BMI above and below 35 kg/mÂ²: A Post-hoc Analysis.	Obes Facts. 2017	29145215		0	-		-	-	-	-		PubMed	0	0
INCREASED BONE TURNOVER IN TYPE 2 DIABETES PATIENTS RANDOMIZED TO BARIATRIC SURGERY VS. MEDICAL THERAPY AT 5 YEARS.	Endocr Pract. 2017	29144812		0	-		-	-	-	-		PubMed	0	0
DPP4 INHIBITOR SITAGLIPTIN AS A POTENTIAL TREATMENT OPTION IN METFORMIN-INTOLERANT OBESE WOMEN WITH POLYCYSTIC OVARY SYNDROME: A PILOT RANDOMIZED STUDY.	Endocr Pract. 2018	29144805		0	-		-	-	-	-		PubMed	0	0
Model-Based Evaluation of Proximal Sodium Reabsorption Through SGLT2 in Health and Diabetes and the Effect of Inhibition With Canagliflozin.	J Clin Pharmacol. 2017	29144539		0	-		-	-	-	-		PubMed	0	0
Saxagliptin add-on therapy in Chinese patients with type 2 diabetes inadequately controlled by insulin with or without metformin: results from the SUPER study, a randomized, double-blind, placebo-controlled trial.	Diabetes Obes Metab. 2017	29144061		0	-		-	-	-	-		PubMed	0	0
Evaluation of antioxidative and diabetes-preventive properties of an ancient grain, KAMUT(Â®) khorasan wheat, in healthy volunteers.	Eur J Nutr. 2017	29143934		0	-		-	-	-	-		PubMed	0	0
iGlarLixi Reduces Glycated Hemoglobin to a Greater Extent Than Basal Insulin Regardless of Levels at Screening: Post Hoc Analysis of LixiLan-L.	Diabetes Ther. 2018	29143919		0	-		-	-	-	-		PubMed	0	0
Increased Free Testosterone Levels in Men with Uncontrolled Type 2 Diabetes Five Years After Randomization to Bariatric Surgery.	Obes Surg. 2018	29143290		0	-		-	-	-	-		PubMed	0	0
Safety and efficacy of metformin up-titration in Japanese patients with type 2 diabetes mellitus treated with vildagliptin and low-dose metformin.	Expert Opin Pharmacother. 2017	29141460		0	-		-	-	-	-		PubMed	0	0
Effects of a mixed berry beverage on cognitive functions and cardiometabolic risk markers; A randomized cross-over study in healthy older adults.	PLoS One. 2017	29141041		0	-		-	-	-	-		PubMed	0	0
The cardiovascular safety of long-acting insulin analogues in type 2 diabetes: Is there a better basal insulin?	J Diabetes Investig. 2017	29140602		0	-		-	-	-	-		PubMed	0	0
Statin use and risk for type 2 diabetes: what clinicians should know.	Postgrad Med. 2017	29139315		0	-		-	-	-	-		PubMed	0	0
Design of a 24-week trial of empagliflozin once daily in hypertensive black/African American patients with type 2 diabetes mellitus.	Curr Med Res Opin. 2018	29139301		0	-		-	-	-	-		PubMed	0	0
Efficacy of self-monitoring blood glucose as a key component of a chronic care model versus usual care in type 2 diabetes patients treated with oral agents: results of a randomized trial.	Acta Diabetol. 2017	29138925		0	-		-	-	-	-		PubMed	0	0
Enhanced Predictive Capability of a 1-Hour Oral Glucose Tolerance Test: A Prospective Population-Based Cohort Study.	Diabetes Care. 2018	29138275		0	-		-	-	-	-		PubMed	0	0
A Systematic Review and Meta-Analysis of Proteomics Literature on the Response of Human Skeletal Muscle to Obesity/Type 2 Diabetes Mellitus (T2DM) Versus Exercise Training.	Proteomes. 2017	29137117		0	-		-	-	-	-		PubMed	0	0
Outcomes of percutaneous coronary intervention in patients with coronary chronic total occlusions with versus without type 2 diabetes mellitus: A systematic review and meta-analysis.	Medicine (Baltimore). 2017	29137044		0	-		-	-	-	-		PubMed	0	0
Genetic prediction of type 2 diabetes using deep neural network.	Clin Genet. 2017	29136281		0	-		-	-	-	-		PubMed	0	0
The Cost-effectiveness of Dulaglutide 1.5mg versus Exenatide QW for the Treatment of Patients with Type 2 Diabetes Mellitus in France.	Diabetes Ther. 2018	29134607		0	-		-	-	-	-		PubMed	0	0
Intravenous Ferric Carboxymaltose in Patients with Type 2 Diabetes Mellitus and Iron Deficiency: CLEVER Trial Study Design and Protocol.	Diabetes Ther. 2018	29134606		0	-		-	-	-	-		PubMed	0	0
Effect of soy on bone turn-over markers in men with type 2 diabetes and hypogonadism - a randomised controlled study.	Sci Rep. 2017	29133833		0	-		-	-	-	-		PubMed	0	0
Cardiovascular Outcomes and Risks After Initiation of a Sodium Glucose Co-Transporter 2 Inhibitor: Results From the EASEL Population-Based Cohort Study.	Circulation. 2017	29133607		0	-		-	-	-	-		PubMed	0	0
Canagliflozin: Cui Bono?	Circulation. 2017	29133603		0	-		-	-	-	-		PubMed	0	0
Cardiovascular Outcomes and Safety of Empagliflozin in Patients With Type 2 Diabetes Mellitus and Peripheral Artery Disease: A Subanalysis of EMPA-REG OUTCOME.	Circulation. 2017	29133602		0	-		-	-	-	-		PubMed	0	0
Chylomicronemia risk factors ranked by importance for the individual and community in 108 711 women and men.	J Intern Med. 2017	29130593		0	-		-	-	-	-		PubMed	0	0
Workplace bullying and violence as risk factors for type 2 diabetes: a multicohort study and meta-analysis.	Diabetologia. 2018	29130114		0	-		-	-	-	-		PubMed	0	0
ADDRESSING HYPERTENSION IN THE PATIENT WITH TYPE 2 DIABETES MELLITUS: PATHOGENESIS, GOALS, AND THERAPEUTIC APPROACH.	Eur Med J Diabetes. 2017	29129996		0	-		-	-	-	-		PubMed	0	0
Prolonged uninterrupted sitting increases fatigue in type 2 diabetes.	Diabetes Res Clin Pract. 2018	29129482		0	-		-	-	-	-		PubMed	0	0
Fetuin-A levels and risk of type 2 diabetes mellitus: a systematic review and meta-analysis.	Acta Diabetol. 2018	29127490		0	-		-	-	-	-		PubMed	0	0
The effects of vitamin E or lipoic acid supplementation on oxyphytosterols in subjects with elevated oxidative stress: a randomized trial.	Sci Rep. 2017	29127425		0	-		-	-	-	-		PubMed	0	0
Risk of Type 2 Diabetes Mellitus Development in the Native Population of Low- and High-Altitude Regions of Kyrgyzstan: Finnish Diabetes Risc Score Questionnaire Results.	High Alt Med Biol. 2017	29125907		0	-		-	-	-	-		PubMed	0	0
Vitamin D and Type 2 Diabetes Mellitus.	Adv Exp Med Biol. 2017	29124701		0	-		-	-	-	-		PubMed	0	0
Psychosocial intervention for patients with type 2 diabetes mellitus and comorbid depression: a meta-analysis of randomized controlled trials.	Neuropsychiatr Dis Treat. 2017	29123401		0	-		-	-	-	-		PubMed	0	0
Multiorgan, Multimodality Imaging in Cardiometabolic Disease.	Circ Cardiovasc Imaging. 2017	29122843		0	-		-	-	-	-		PubMed	0	0
Study protocol for the Cities Changing Diabetes programme: a global mixed-methods approach.	BMJ Open. 2017	29122782		0	-		-	-	-	-		PubMed	0	0
Predictors of insulin uptake among adults with type 2 diabetes in the Stepping Up Study.	Diabetes Res Clin Pract. 2017	29122108		0	-		-	-	-	-		PubMed	0	0
Effect of rosuvastatin on fasting and postprandial endothelial biomarker levels and microvascular reactivity in patients with type 2 diabetes and dyslipidemia: a preliminary report.	Cardiovasc Diabetol. 2017	29121934		0	-		-	-	-	-		PubMed	0	0
Transcatheter aortic valve implantation and surgical aortic valve replacement among hospitalized patients with and without type 2 diabetes mellitus in Spain (2014-2015).	Cardiovasc Diabetol. 2017	29121921		0	-		-	-	-	-		PubMed	0	0
Face-to-face versus telephone delivery of the Green Prescription for MÄori and New Zealand Europeans with type-2 diabetes mellitus: influence on participation and health outcomes.	N Z Med J. 2017	29121625		0	-		-	-	-	-		PubMed	0	0
Four-year long-term follow-up of diabetes patients after implementation of the Chronic Care Model in primary care: a cross-sectional study.	Swiss Med Wkly. 2017	29120011		0	-		-	-	-	-		PubMed	0	0
A Fully Automated Web-Based Program Improves Lifestyle Habits and HbA1c in Patients With Type 2 Diabetes and Abdominal Obesity: Randomized Trial of Patient E-Coaching Nutritional Support (The ANODE Study).	J Med Internet Res. 2017	29117929		0	-		-	-	-	-		PubMed	0	0
Use of the smartphone application "Pregnant with Diabetes".	Dan Med J. 2017	29115204		0	-		-	-	-	-		PubMed	0	0
Immediate effect of passive static stretching versus resistance exercises on postprandial blood sugar levels in type 2 diabetes mellitus: a randomized clinical trial.	J Exerc Rehabil. 2017	29114534		0	-		-	-	-	-		PubMed	0	0
A New Treatment Strategy for Parkinson's Disease through the Gut-Brain Axis: The Glucagon-Like Peptide-1 Receptor Pathway.	Cell Transplant. 2017	29113464		0	-		-	-	-	-		PubMed	0	0
Alterations in retinal nerve fiber layer thickness in early stages of diabetic retinopathy and potential risk factors.	Curr Eye Res. 2018	29111833		0	-		-	-	-	-		PubMed	0	0
Diet Quality as Assessed by the Healthy Eating Index, Alternate Healthy Eating Index, Dietary Approaches to Stop Hypertension Score, and Health Outcomes: An Updated Systematic Review and Meta-Analysis of Cohort Studies.	J Acad Nutr Diet. 2018	29111090		0	-		-	-	-	-		PubMed	0	0
Patient-reported Outcomes in Patients with Type 2 Diabetes Treated with Dulaglutide Added to Titrated Insulin Glargine (AWARD-9).	Clin Ther. 2017	29110972		0	-		-	-	-	-		PubMed	0	0
A randomized, placebo-controlled clinical trial evaluating the safety and efficacy of the once-weekly DPP-4 inhibitor omarigliptin in patients with type 2 diabetes mellitus inadequately controlled by glimepiride and metformin.	BMC Endocr Disord. 2017	29110647		0	-		-	-	-	-		PubMed	0	0
Long-term efficacy and safety of canagliflozin in combination with insulin in Japanese patients with type 2 diabetes mellitus.	Diabetes Obes Metab. 2017	29110384		0	-		-	-	-	-		PubMed	0	0
The Effect of 6 and 12Â months Duodenal-Jejunal Bypass Liner Treatment on Obesity and Type 2 Diabetes: a Crossover Cohort Study.	Obes Surg. 2017	29110244		0	-		-	-	-	-		PubMed	0	0
Understanding the impact of hypoglycemia on the cardiovascular system.	Expert Rev Endocrinol Metab. 2017	29109754		0	-		-	-	-	-		PubMed	0	0
Associations of Salivary BPIFA1 Protein in Chronic Periodontitis Patients with Type 2 Diabetes Mellitus.	Int J Endocrinol. 2017	29109737		0	-		-	-	-	-		PubMed	0	0
Psychometric testing of the Family-Carer Diabetes Management Self-Efficacy Scale.	Health Soc Care Community. 2017	29108139		0	-		-	-	-	-		PubMed	0	0
Type 2 diabetes mellitus and risk of open-angle glaucoma development in Koreans: An 11-year nationwide propensity-score-matched study.	Diabetes Metab. 2017	29107455		0	-		-	-	-	-		PubMed	0	0
APPLICATION OF THE AACE/ACE ADVANCED FRAMEWORK FOR THE DIAGNOSIS OF OBESITY AND CARDIOMETABOLIC DISEASE STAGING IN A GENERAL POPULATION FROM 3 REGIONS OF VENEZUELA: THE VEMSOLS STUDY RESULTS.	Endocr Pract. 2018	29106817		0	-		-	-	-	-		PubMed	0	0
Moderate salt restriction with or without paricalcitol in type 2 diabetes and losartan-resistant macroalbuminuria (PROCEED): a randomised, double-blind, placebo-controlled, crossover trial.	Lancet Diabetes Endocrinol. 2018	29104158		0	-		-	-	-	-		PubMed	0	0
Perceived barriers to leisure time physical activity in adults with type 2 diabetes attending primary healthcare in Oman: a cross-sectional survey.	BMJ Open. 2017	29102987		0	-		-	-	-	-		PubMed	0	0
Patient Preferences for Attributes of Type 2 Diabetes Mellitus Medications in Germany and Spain: An Online Discrete-Choice Experiment Survey.	Diabetes Ther. 2017	29101681		0	-		-	-	-	-		PubMed	0	0
Correction to: Prevention of Type 2 Diabetes with the Chinese Herbal Medicine Tianqi Capsule: A Systematic Review and Meta-Analysis.	Diabetes Ther. 2017	29101680		0	-		-	-	-	-		PubMed	0	0
Three-question set from Michigan Neuropathy Screening Instrument adds independent prognostic information on cardiovascular outcomes: analysis of ALTITUDE trial.	Diabetologia. 2017	29098323		0	-		-	-	-	-		PubMed	0	0
Sugar-sweetened beverage intake associations with fasting glucose and insulin concentrations are not modified by selected genetic variants in a ChREBP-FGF21 pathway: a meta-analysis.	Diabetologia. 2018	29098321		0	-		-	-	-	-		PubMed	0	0
Reducing Cholesterol and Fat Intake Improves Glucose Tolerance by Enhancing Î² Cell Function in Nondiabetic Subjects.	J Clin Endocrinol Metab. 2018	29095990		0	-		-	-	-	-		PubMed	0	0
Accuracy of a screening tool for medication adherence: A systematic review and meta-analysis of the Morisky Medication Adherence Scale-8.	PLoS One. 2017	29095870		0	-		-	-	-	-		PubMed	0	0
Identifying Patterns of Lifestyle Behaviors among People with Type 2 Diabetes in Tianjin, China: A Latent Class Analysis.	Diabetes Ther. 2017	29094299		0	-		-	-	-	-		PubMed	0	0
Tissue evacuated during joint replacement procedure as a source of mononuclear cells.	Eur J Orthop Surg Traumatol. 2017	29094213		0	-		-	-	-	-		PubMed	0	0
Quantitative Relationship Between Cumulative Risk Alleles Based on Genome-Wide Association Studies and Type 2 Diabetes Mellitus: A Systematic Review and Meta-analysis.	J Epidemiol. 2018	29093303		0	-		-	-	-	-		PubMed	0	0
Satisfaction and efficacy of switching from daily dipeptidyl peptidase-4 inhibitors to weekly trelagliptin in patients with type 2 diabetes-Randomized controlled study.	Endocr J. 2018	29093280		0	-		-	-	-	-		PubMed	0	0
A systematic review and meta-analysis of nutrition therapy compared with dietary advice in patients with type 2 diabetes.	Am J Clin Nutr. 2017	29092883		0	-		-	-	-	-		PubMed	0	0
Effects of potassium supplements on glucose metabolism in African Americans with prediabetes: a pilot trial.	Am J Clin Nutr. 2017	29092881		0	-		-	-	-	-		PubMed	0	0
Genetically determined schizophrenia is not associated with impaired glucose homeostasis.	Schizophr Res. 2017	29092750		0	-		-	-	-	-		PubMed	0	0
Evaluation of antioxidant status of female diabetic patientsin Nnamdi Azikiwe University Teaching Hospital, Anambra State, Nigeria.	Br J Biomed Sci. 2015	29091574		0	-		-	-	-	-		PubMed	0	0
Metabolic memory: Evolving concepts.	J Diabetes. 2018	29091343		0	-		-	-	-	-		PubMed	0	0
Self-management interventions in patients with long-term conditions: a structured review of approaches to reporting inclusion, assessment, and outcomes in multimorbidity.	J Comorb. 2014	29090152		0	-		-	-	-	-		PubMed	0	0
Utilization of a cardiometabolic health nurse - a novel strategy to manage comorbid physical and mental illness.	J Comorb. 2014	29090150		0	-		-	-	-	-		PubMed	0	0
The outcomes of peer-led diabetes education in comparison to education delivered by health professionals in Iranian patients.	Health Educ Res. 2017	29088414		0	-		-	-	-	-		PubMed	0	0
Effects of Lobeglitazone, a Novel Thiazolidinedione, on Bone Mineral Density in Patients with Type 2 Diabetes Mellitus over 52 Weeks.	Diabetes Metab J. 2017	29086536		0	-		-	-	-	-		PubMed	0	0
Binge Eating and Weight Loss Outcomes in Individuals with Type 2 Diabetes: 4-Year Results from the Look AHEAD Study.	Obesity (Silver Spring). 2017	29086498		0	-		-	-	-	-		PubMed	0	0
Neutral protamine hagedorn/regular insulin in the treatment of inpatient hyperglycemia: Comparison of 3 basal-bolus regimens.	World J Diabetes. 2017	29085572		0	-		-	-	-	-		PubMed	0	0
Effectiveness of sitagliptin compared to sulfonylureas for type 2 diabetes mellitus inadequately controlled on metformin: a systematic review and meta-analysis.	BMJ Open. 2017	29084794		0	-		-	-	-	-		PubMed	0	0
EZSCAN for undiagnosed type 2 diabetes mellitus: A systematic review and meta-analysis.	PLoS One. 2017	29084286		0	-		-	-	-	-		PubMed	0	0
Personalized Care and the Role of Insulin as a Vehicle to Optimizing Treatments in Diabetes Care.	J Manag Care Spec Pharm. 2017	29083969		0	-		-	-	-	-		PubMed	0	0
Pilot feasibility study examining a structured self-management diabetes education programme, DESMOND-ID, targeting HbA(1c) in adults with intellectual disabilities.	Diabet Med. 2018	29083501		0	-		-	-	-	-		PubMed	0	0
Albiglutide efficacy and safety in the Latino/Hispanic subpopulation for the integrated phase III program.	Postgrad Med. 2017	29083275		0	-		-	-	-	-		PubMed	0	0
Male non-insulin users with type 2 diabetes mellitus are predisposed to gastric corpus-predominant inflammation after H. pylori infection.	J Biomed Sci. 2017	29082856		0	-		-	-	-	-		PubMed	0	0
Long Term Effect of Intensive Lifestyle Intervention on Cerebral Blood Flow.	J Am Geriatr Soc. 2018	29082505		0	-		-	-	-	-		PubMed	0	0
Vitamin D Supplementation Improves Mood in Women with Type 2 Diabetes.	J Diabetes Res. 2017	29082262		0	-		-	-	-	-		PubMed	0	0
Statin use and risk of developing diabetes: results from the Diabetes Prevention Program.	BMJ Open Diabetes Res Care. 2017	29081977		0	-		-	-	-	-		PubMed	0	0
Cost Effectiveness of Exenatide Once Weekly Versus Insulin Glargine and Liraglutide for the Treatment of Type 2 Diabetes Mellitus in Greece.	Clin Drug Investig. 2018	29080210		0	-		-	-	-	-		PubMed	0	0
Probabilistic sensitivity analysis on Markov models with uncertain transition probabilities: an application in evaluating treatment decisions for type 2 diabetes.	Health Care Manag Sci. 2017	29080053		0	-		-	-	-	-		PubMed	0	0
The Effects of Synbiotic Supplementation on Carotid Intima-Media Thickness, Biomarkers of Inflammation, and Oxidative Stress in People with Overweight, Diabetes, and Coronary Heart Disease: a Randomized, Double-Blind, Placebo-Controlled Trial.	Probiotics Antimicrob Proteins. 2017	29079990		0	-		-	-	-	-		PubMed	0	0
Effects of bariatric surgery on glycemic and lipid metabolism, surgical complication and quality of life in adolescents with obesity: a systematic review and meta-analysis.	Surg Obes Relat Dis. 2017	29079384		0	-		-	-	-	-		PubMed	0	0
A randomized, double-blind trial evaluating the efficacy and safety of monotherapy with the once-weekly dipeptidyl peptidase-4 inhibitor omarigliptin in people with type 2 diabetes.	Diabetes Res Clin Pract. 2017	29079379		0	-		-	-	-	-		PubMed	0	0
Predicting persistent impaired glucose tolerance in patients with gestational diabetes: The role of high sensitivity CRP and adiponectin.	Diabetes Metab Res Rev. 2018	29078256		0	-		-	-	-	-		PubMed	0	0
Effect of Trelagliptin on Quality of Life in Patients with Type 2 Diabetes Mellitus: Study Protocol.	Diabetes Ther. 2017	29076039		0	-		-	-	-	-		PubMed	0	0
Prediction of Type 2 Diabetes by Hemoglobin A(1c) in Two Community-Based Cohorts.	Diabetes Care. 2018	29074816		0	-		-	-	-	-		PubMed	0	0
Fasting blood glucose and risk of prostate cancer: A systematic review and meta-analysis of dose-response.	Diabetes Metab. 2017	29074328		0	-		-	-	-	-		PubMed	0	0
Incretin-based therapy in type 2 diabetes: An evidence based systematic review and meta-analysis.	J Diabetes Complications. 2018	29074120		0	-		-	-	-	-		PubMed	0	0
Prevalence of peripheral artery disease (PAD) and factors associated: An epidemiological analysis from the population-based Screening PRE-diabetes and type 2 DIAbetes (SPREDIA-2) study.	PLoS One. 2017	29073236		0	-		-	-	-	-		PubMed	0	0
Zinc supplementation in pre-diabetes: A randomized double-blind placebo-controlled clinical trial.	J Diabetes. 2017	29072815		0	-		-	-	-	-		PubMed	0	0
Anti-interleukin-1 therapy has mild hypoglycaemic effect in type 2 diabetes.	Diabetes Obes Metab. 2017	29072812		0	-		-	-	-	-		PubMed	0	0
Effect of sitagliptin on glucose control in type 2 diabetes mellitus after Roux-en-Y gastric bypass surgery.	Diabetes Obes Metab. 2017	29072800		0	-		-	-	-	-		PubMed	0	0
Effect of high and low glycemic index breakfast on postprandial metabolic parameters and satiety in subjects with type 2 diabetes mellitus under intensive insulin therapy: Controlled clinical trial.	Clin Nutr ESPEN. 2017	29072163		0	-		-	-	-	-		PubMed	0	0
Cognitive effects of a 30-min aerobic exercise bout on adults with overweight/obesity and type 2 diabetes.	Obes Sci Pract. 2017	29071105		0	-		-	-	-	-		PubMed	0	0
Stair ascending-descending exercise accelerates the decrease in postprandial hyperglycemia more efficiently than bicycle exercise.	BMJ Open Diabetes Res Care. 2017	29071088		0	-		-	-	-	-		PubMed	0	0
Glucose-lowering effects and safety of DS-8500a, a G protein-coupled receptor 119 agonist, in Japanese patients with type 2 diabetes: results of a randomized, double-blind, placebo-controlled, parallel-group, multicenter, phase II study.	BMJ Open Diabetes Res Care. 2017	29071087		0	-		-	-	-	-		PubMed	0	0
Does the behavioural type-specific approach for type 2 diabetes promote changes in lifestyle? Protocol of a cluster randomised trial in Japan.	BMJ Open. 2017	29070640		0	-		-	-	-	-		PubMed	0	0
The effect of renal denervation in an experimental model of chronic renal insufficiency, The REmnant kidney Denervation In Pigs study (REDIP study).	J Transl Med. 2017	29070043		0	-		-	-	-	-		PubMed	0	0
Comparison of twelve single-drug regimens for the treatment of type 2 diabetes mellitus.	Oncotarget. 2017	29069819		0	-		-	-	-	-		PubMed	0	0
A cohort study of comorbidity in patients with granulomatosis with polyangiitis.	Rheumatology (Oxford). 2018	29069513		0	-		-	-	-	-		PubMed	0	0
Prevalence, risk factors, and prognostic significance of masked hypertension in diabetic patients.	Medicine (Baltimore). 2017	29069022		0	-		-	-	-	-		PubMed	0	0
The association between vitamin D level and diabetic peripheral neuropathy in patients with type 2 diabetes mellitus: An update systematic review and meta-analysis.	J Clin Transl Endocrinol. 2017	29067266		0	-		-	-	-	-		PubMed	0	0
Outpatient management of steroid-induced hyperglycaemia and steroid-induced diabetes in people with lymphoproliferative disorders treated with intermittent high dose steroids.	J Clin Transl Endocrinol. 2017	29067264		0	-		-	-	-	-		PubMed	0	0
Physical inactivity and cardiac events: An analysis of the Detection of Ischemia in Asymptomatic Diabetics (DIAD) study.	J Clin Transl Endocrinol. 2017	29067262		0	-		-	-	-	-		PubMed	0	0
The effect of text message support on diabetes self-management in developing countries - A randomised trial.	J Clin Transl Endocrinol. 2017	29067248		0	-		-	-	-	-		PubMed	0	0
Treating psychological insulin resistance in type 2 diabetes.	J Clin Transl Endocrinol. 2017	29067243		0	-		-	-	-	-		PubMed	0	0
Effect of phosphodiesterase-5 inhibitors on glycemic control in person with type 2 diabetes mellitus: A systematic review and meta-analysis.	J Clin Transl Endocrinol. 2016	29067241		0	-		-	-	-	-		PubMed	0	0
Differences between genders in relation to factors associated with risk of diabetic foot in elderly persons: A cross-sectional trial.	J Clin Transl Endocrinol. 2016	29067239		0	-		-	-	-	-		PubMed	0	0
Ipragliflozin lowers small, dense low-density lipoprotein cholesterol levels in Japanese patients with type 2 diabetes mellitus.	J Clin Transl Endocrinol. 2016	29067237		0	-		-	-	-	-		PubMed	0	0
Effect of Vitamin D supplementation on reduction in levels of HbA1 in patients recently diagnosed with type 2 Diabetes Mellitus having asymptomatic Vitamin D deficiency.	Pak J Med Sci. 2017	29067058		0	-		-	-	-	-		PubMed	0	0
Awareness of diabetic retinopathy among patients with type 2 diabetes mellitus in Jordan.	Diabetes Metab Syndr Obes. 2017	29066926		0	-		-	-	-	-		PubMed	0	0
Effectiveness of behavioral change techniques employed in eHealth interventions designed to improve glycemic control in persons with poorly controlled type 2 diabetes: a systematic review and meta-analysis protocol.	Syst Rev. 2017	29065911		0	-		-	-	-	-		PubMed	0	0
Serum vaspin concentration in elderly patients with type 2 diabetes mellitus and macrovascular complications.	BMC Endocr Disord. 2017	29065866		0	-		-	-	-	-		PubMed	0	0
Effectiveness and safety of exenatide in Korean patients with type 2 diabetes inadequately controlled with oral hypoglycemic agents: an observational study in a real clinical practice.	BMC Endocr Disord. 2017	29065865		0	-		-	-	-	-		PubMed	0	0
Identifying insulin treatment responders with a composite measure: beyond Hba1c <â€‰7% in patients with type 2 diabetes.	Curr Med Res Opin. 2018	29065720		0	-		-	-	-	-		PubMed	0	0
High-sensitivity C-reactive protein, low-density lipoprotein cholesterol and cardiovascular outcomes in patients with type 2 diabetes in the EXAMINE (Examination of Cardiovascular Outcomes with Alogliptin versus Standard of Care) trial.	Diabetes Obes Metab. 2017	29064626		0	-		-	-	-	-		PubMed	0	0
Association of PGC-1Î± gene with type 2 diabetes in three unrelated endogamous groups of North-West India (Punjab): a case-control and meta-analysis study.	Mol Genet Genomics. 2017	29063962		0	-		-	-	-	-		PubMed	0	0
Elevation of serum uric acid and incidence of type 2 diabetes: AÂ systematic review and meta-analysis.	Chronic Dis Transl Med. 2016	29063028		0	-		-	-	-	-		PubMed	0	0
Self-reported Hypoglycaemia in Patients treated with Insulin: A Large Slovenian Retrospectively-prospective Study.	Zdr Varst. 2017	29062399		0	-		-	-	-	-		PubMed	0	0
Dietary program and physical activity impact on biochemical markers in patients with type 2 diabetes: A systematic review.	Aten Primaria. 2017	29061310		0	-		-	-	-	-		PubMed	0	0
Glucagon-like peptide-1 levels and dipeptidyl peptidase-4 activity in type 2 diabetes.	Clin Invest Med. 2017	29061224		0	-		-	-	-	-		PubMed	0	0
Case definitions for inclusion and analysis of endpoints in clinical trials for NASH through the lens of regulatory science.	Hepatology. 2017	29059456		0	-		-	-	-	-		PubMed	0	0
Baseline Characteristics and Technology Training of Underserved Adults With Type 2 Diabetes in the Mobile Diabetes Detective (MoDD) Randomized Controlled Trial.	Diabetes Educ. 2017	29059017		0	-		-	-	-	-		PubMed	0	0
Effect of recurrent severe hypoglycemia on cognitive performance in adult patients with diabetes: A meta-analysis.	J Huazhong Univ Sci Technolog Med Sci. 2017	29058275		0	-		-	-	-	-		PubMed	0	0
Nonalcoholic fatty liver disease as a predictor of atrial fibrillation: a systematic review and meta-analysis.	Postepy Kardiol Interwencyjnej. 2017	29056998		0	-		-	-	-	-		PubMed	0	0
Effect of garlic supplement in the management of type 2 diabetes mellitus (T2DM): a meta-analysis of randomized controlled trials.	Food Nutr Res. 2017	29056888		0	-		-	-	-	-		PubMed	0	0
Relationship of Glucose Variability With Glycated Hemoglobin and Daily Mean Glucose: A Post Hoc Analysis of Data From 5 Phase 3 Studies.	J Diabetes Sci Technol. 2017	29056082		0	-		-	-	-	-		PubMed	0	0
A peer support intervention in improving glycemic control in patients with type 2 diabetes.	Patient Educ Couns. 2017	29055655		0	-		-	-	-	-		PubMed	0	0
Physical Function Following a Long-Term Lifestyle Intervention among Middle Aged and Older Adults with Type 2 Diabetes: the Look AHEAD Study.	J Gerontol A Biol Sci Med Sci. 2017	29053861		0	-		-	-	-	-		PubMed	0	0
A Bayesian Meta-analysis Method for Estimating Risk Difference of Rare Events.	J Biopharm Stat. 2017	29053049		0	-		-	-	-	-		PubMed	0	0
Meta-analysis of full ROC curves using bivariate time-to-event models for interval-censored data.	Res Synth Methods. 2017	29052956		0	-		-	-	-	-		PubMed	0	0
Decreased diabetes risk over 9Â year after 18-month oral L-arginine treatment in middle-aged subjects with impaired glucose tolerance and metabolic syndrome (extension evaluation of L-arginine study).	Eur J Nutr. 2017	29052766		0	-		-	-	-	-		PubMed	0	0
Predictors of mortality in hospital survivors with type 2 diabetes mellitus and acute coronary syndromes.	Diab Vasc Dis Res. 2018	29052439		0	-		-	-	-	-		PubMed	0	0
Glycaemic response after intake of a high energy, high protein, diabetes-specific formula in older malnourished or at risk of malnutrition type 2 diabetes patients.	Clin Nutr. 2017	29050650		0	-		-	-	-	-		PubMed	0	0
Effect of diacerein on renal function and inflammatory cytokines in participants with type 2 diabetes mellitus and chronic kidney disease: A randomized controlled trial.	PLoS One. 2017	29049415		0	-		-	-	-	-		PubMed	0	0
Clinical factors associated with the symptoms of constipation in patients with diabetes mellitus: a multicenter study.	J Gastroenterol Hepatol. 2017	29048762		0	-		-	-	-	-		PubMed	0	0
Pioglitazone reduces cold-induced brown fat glucose uptake despite induction of browning in cultured human adipocytes: a randomised, controlled trial in humans.	Diabetologia. 2018	29046921		0	-		-	-	-	-		PubMed	0	0
Genetic Support for a Causal Role of Insulin Resistance on Circulating Branched-Chain Amino Acids and Inflammation.	Diabetes Care. 2017	29046328		0	-		-	-	-	-		PubMed	0	0
The Molecular Physiopathogenesis of Islet Amyloidosis.	Handb Exp Pharmacol. 2017	29043504		0	-		-	-	-	-		PubMed	0	0
Effects of intranasal insulin application on the hypothalamic BOLD response to glucose ingestion.	Sci Rep. 2017	29042645		0	-		-	-	-	-		PubMed	0	0
Renal and Cardiovascular Effects of sodium-glucose cotransporter 2 (SGLT2) inhibition in combination with loop Diuretics in diabetic patients with Chronic Heart Failure (RECEDE-CHF): protocol for a randomised controlled double-blind cross-over trial.	BMJ Open. 2017	29042392		0	-		-	-	-	-		PubMed	0	0
Identification of a novel proinsulin-associated SNP and demonstration that proinsulin is unlikely to be a causal factor in subclinical vascular remodelling using Mendelian randomisation.	Atherosclerosis. 2017	29040868		0	-		-	-	-	-		PubMed	0	0
Dietary carbohydrates, components of energy balance, and associated health outcomes.	Nutr Rev. 2017	29040716		0	-		-	-	-	-		PubMed	0	0
The prevalence of Type 2 diabetes is not increased in normal-weight women with PCOS.	Hum Reprod. 2017	29040530		0	-		-	-	-	-		PubMed	0	0
Benefit and harm of intensive blood pressure treatment: Derivation and validation of risk models using data from the SPRINT and ACCORD trials.	PLoS Med. 2017	29040268		0	-		-	-	-	-		PubMed	0	0
Comparison of Two Sources of Clinical Audit Data to Assess the Delivery of Diabetes Care in Aboriginal Communities.	Int J Environ Res Public Health. 2017	29039778		0	-		-	-	-	-		PubMed	0	0
SGLT2 inhibitors: are they safe?	Postgrad Med. 2017	29039237		0	-		-	-	-	-		PubMed	0	0
Depression and related risk factors among patients with type 2 diabetes mellitus, Jazan area, KSA: A cross-sectional study.	Diabetes Metab Syndr. 2017	29037887		0	-		-	-	-	-		PubMed	0	0
Statin use and knee osteoarthritis progression: Results from a post-hoc analysis of the SEKOIA trial.	Joint Bone Spine. 2017	29037516		0	-		-	-	-	-		PubMed	0	0
Feasibility of a multi-modal exercise program on cognition in older adults with Type 2 diabetes - a pilot randomised controlled trial.	BMC Geriatr. 2017	29037162		0	-		-	-	-	-		PubMed	0	0
Effectiveness of a PRECEDE-based education intervention on quality of life in elderly patients with chronic heart failure.	BMC Cardiovasc Disord. 2017	29037148		0	-		-	-	-	-		PubMed	0	0
Barriers to Self-Management in Depressed Women With Type 2 Diabetes.	Can J Nurs Res. 2017	29037063		0	-		-	-	-	-		PubMed	0	0
The Effect of Eicosapentaenoic Acid on the Serum Levels and Enzymatic Activity of Paraoxonase 1 in the Patients With Type 2 Diabetes Mellitus.	Acta Med Iran. 2017	29034644		0	-		-	-	-	-		PubMed	0	0
Immediate effect of bitter gourd, ash gourd, Knol-khol juices on blood sugar levels of patients with type 2 diabetes mellitus: A pilot study.	J Tradit Complement Med. 2017	29034203		0	-		-	-	-	-		PubMed	0	0
Brain gray matter changes in type 2 diabetes mellitus: A meta-analysis of whole-brain voxel-based morphometry study.	J Diabetes Complications. 2017	29033311		0	-		-	-	-	-		PubMed	0	0
Antidiabetic Drugs as Antihypertensives: New Data on the Horizon.	Curr Vasc Pharmacol. 2017	29032756		0	-		-	-	-	-		PubMed	0	0
Sodium-glucose cotransporter 2 inhibitor, tofogliflozin, shows better improvements of blood glucose and insulin secretion in patients with high insulin levels at baseline.	J Diabetes Investig. 2017	29032638		0	-		-	-	-	-		PubMed	0	0
Effects of Vildagliptin on Ventricular Function in Patients With Type 2 DiabetesÂ Mellitus and Heart Failure: A Randomized Placebo-Controlled Trial.	JACC Heart Fail. 2018	29032139		0	-		-	-	-	-		PubMed	0	0
The kidney and cardiovascular outcome trials.	J Diabetes. 2018	29031006		0	-		-	-	-	-		PubMed	0	0
Carbohydrate restriction with postmeal walking effectively mitigates postprandial hyperglycemia and improves endothelial function in type 2 diabetes.	Am J Physiol Heart Circ Physiol. 2018	29030343		0	-		-	-	-	-		PubMed	0	0
Dietary carbohydrates, components of energy balance, and associated health outcomes.	Nutr Rev. 2017	29028272		0	-		-	-	-	-		PubMed	0	0
Prevention of Type 2 Diabetes with the Chinese Herbal Medicine Tianqi Capsule: A Systematic Review and Meta-Analysis.	Diabetes Ther. 2017	29027648		0	-		-	-	-	-		PubMed	0	0
Acanthosis nigricans: A screening test for insulin resistance - An important risk factor for diabetes mellitus type-2.	J Family Med Prim Care. 2017	29026747		0	-		-	-	-	-		PubMed	0	0
Transglucosidase improves the bowel movements in type 2 diabetes mellitus patients: A preliminary randomized double-blind, placebo-controlled study.	United European Gastroenterol J. 2017	29026604		0	-		-	-	-	-		PubMed	0	0
TCF7L2 Genetic Variants Contribute to Phenotypic Heterogeneity of Type 1 Diabetes.	Diabetes Care. 2018	29025879		0	-		-	-	-	-		PubMed	0	0
Characterizing Active Ingredients of eHealth Interventions Targeting Persons With Poorly Controlled Type 2 Diabetes Mellitus Using the Behavior Change Techniques Taxonomy: Scoping Review.	J Med Internet Res. 2017	29025693		0	-		-	-	-	-		PubMed	0	0
Clinic Appointment Attendance in Adults with Serious Mental Illness and Diabetes.	Am J Health Behav. 2017	29025509		0	-		-	-	-	-		PubMed	0	0
Safety and efficacy of canagliflozin in elderly patients with type 2 diabetes mellitus: a 1-year post-marketing surveillance in Japan.	Curr Med Res Opin. 2018	29025285		0	-		-	-	-	-		PubMed	0	0
The representativeness of eligible patients in type 2 diabetes trials: a case study using GIST 2.0.	J Am Med Inform Assoc. 2017	29025047		0	-		-	-	-	-		PubMed	0	0
Modelling cumulative exposure for inference about drug effects in observational studies.	Pharmacoepidemiol Drug Saf. 2017	29024286		0	-		-	-	-	-		PubMed	0	0
Endurance exercise training decreased serum levels of surfactant protein D and improved aerobic fitness of obese women with type-2 diabetes.	Diabetol Metab Syndr. 2017	29021828		0	-		-	-	-	-		PubMed	0	0
Pomegranate juice, but not an extract, confers a lower glycemic response on a high-glycemic index food: randomized, crossover, controlled trials in healthy subjects.	Am J Clin Nutr. 2017	29021286		0	-		-	-	-	-		PubMed	0	0
A combination of plasma phospholipid fatty acids and its association with incidence of type 2 diabetes: The EPIC-InterAct case-cohort study.	PLoS Med. 2017	29020051		0	-		-	-	-	-		PubMed	0	0
Effects of resveratrol on glucose control and insulin sensitivity in subjects with type 2 diabetes: systematic review and meta-analysis.	Nutr Metab (Lond). 2017	29018489		0	-		-	-	-	-		PubMed	0	0
The effect of atorvastatin on pancreatic beta cell requirement in women with polycystic ovary syndrome.	Endocr Connect. 2017	29018156		0	-		-	-	-	-		PubMed	0	0
The effects of vildagliptin compared with metformin on vascular endothelial function and metabolic parameters: a randomized, controlled trial (Sapporo Athero-Incretin Study 3).	Cardiovasc Diabetol. 2017	29017497		0	-		-	-	-	-		PubMed	0	0
Clinical considerations for use of insulin degludec/insulin aspart in Japanese patients.	Expert Opin Biol Ther. 2017	29017373		0	-		-	-	-	-		PubMed	0	0
Beneficial Effects of n-3 Fatty Acids on Cardiometabolic and Inflammatory Markers in Type 2 Diabetes Mellitus: A Randomized Placebo-Controlled Double-blind Clinical Trial.	Med Princ Pract. 2017	29017158		0	-		-	-	-	-		PubMed	0	0
Cardiac effects of SGLT2 inhibitors: the sodium hypothesis.	Cardiovasc Res. 2018	29016751		0	-		-	-	-	-		PubMed	0	0
Depressive Symptoms, Antidepressant Medication Use, and Inflammatory Markers in the Diabetes Prevention Program.	Psychosom Med. 2018	29016549		0	-		-	-	-	-		PubMed	0	0
A Preliminary Study of the Effects of a Multitheory-Driven Intervention in Adults With Prediabetes Mellitus.	J Nurs Res. 2017	29016463		0	-		-	-	-	-		PubMed	0	0
Sensing interstitial glucose to nudge active lifestyles (SIGNAL): feasibility of combining novel self-monitoring technologies for persuasive behaviour change.	BMJ Open. 2017	28993396		0	-		-	-	-	-		PubMed	0	0
Effectiveness of certified diabetes educators following pre-approved protocols to redesign diabetes care delivery in primary care: Results of the REMEDIES 4D trial.	Contemp Clin Trials. 2018	28993287		0	-		-	-	-	-		PubMed	0	0
Metabolic imaging of fatty kidney in diabesity: validation and dietary intervention.	Nephrol Dial Transplant. 2018	28992141		0	-		-	-	-	-		PubMed	0	0
Intra-individual variability and circadian rhythm of vascular endothelial growth factors in subjects with normal glucose tolerance and type 2 diabetes.	PLoS One. 2017	28991900		0	-		-	-	-	-		PubMed	0	0
Impact of Injection Speed, Volume, and Site on Pain Sensation.	J Diabetes Sci Technol. 2018	28990437		0	-		-	-	-	-		PubMed	0	0
Bone mineral density and risk of type 2 diabetes and coronary heart disease: A Mendelian randomization study.	Wellcome Open Res. 2017	28989980		0	-		-	-	-	-		PubMed	0	0
Comparative Evaluation of Safety and Efficacy of Glimepiride and Sitagliptin in Combination with Metformin in Patients with Type 2 Diabetes Mellitus: Indian Multicentric Randomized Trial - START Study.	Indian J Endocrinol Metab. 2017	28989886		0	-		-	-	-	-		PubMed	0	0
Carbohydrate-last meal pattern lowers postprandial glucose and insulin excursions in type 2 diabetes.	BMJ Open Diabetes Res Care. 2017	28989726		0	-		-	-	-	-		PubMed	0	0
Antihypertensive effect of an enzymatic hydrolysate from Styela clava flesh tissue in type 2 diabetic patients with hypertension.	Nutr Res Pract. 2017	28989576		0	-		-	-	-	-		PubMed	0	0
Design, synthesis and biological evaluation of 4,7,12,12a-tetrahydro-5H-thieno[3',2':3,4]pyrido[1,2-b]isoquinolines as novel adenosine 5'-monophosphate-activated protein kinase (AMPK) indirect activators for the treatment of type 2 diabetes.	Eur J Med Chem. 2017	28987606		0	-		-	-	-	-		PubMed	0	0
Causes of Death in a Contemporary Cohort of Patients With Type 2 Diabetes and Atherosclerotic Cardiovascular Disease: Insights From the TECOS Trial.	Diabetes Care. 2017	28986504		0	-		-	-	-	-		PubMed	0	0
Development of a multi-component lifestyle intervention for preventing type 2 diabetes and cardiovascular risk factors in adults with intellectual disabilities.	J Public Health (Oxf). 2017	28985308		0	-		-	-	-	-		PubMed	0	0
Dapagliflozin and saxagliptin tablets for adults with type 2 diabetes.	Expert Rev Clin Pharmacol. 2017	28984487		0	-		-	-	-	-		PubMed	0	0
Magnitude and sources of distress in mid-life adults with chronic medical illness: an exploratory mixed-methods analysis.	Psychol Health Med. 2017	28984158		0	-		-	-	-	-		PubMed	0	0
Safety and efficacy of the combination of the glucagon-like peptide-1 receptor agonist liraglutide with an oral antidiabetic drug in Japanese patients with type 2 diabetes: Post-hoc analysis of a randomized, 52-week, open-label, parallel-group trial.	J Diabetes Investig. 2017	28984041		0	-		-	-	-	-		PubMed	0	0
Tolerability and Effectiveness of Exenatide Once Weekly Relative to Basal Insulin Among Type 2 Diabetes Patients of Different Races in Routine Care.	Diabetes Ther. 2017	28983857		0	-		-	-	-	-		PubMed	0	0
Random non-fasting C-peptide testing can identify patients with insulin-treated type 2 diabetes at high risk of hypoglycaemia.	Diabetologia. 2018	28983693		0	-		-	-	-	-		PubMed	0	0
Sitagliptin 100â€‰mg vs glimepiride 1-3â€‰mg as an add-on to insulin and metformin in type 2 diabetes (SWIM).	Endocr Connect. 2017	28982699		0	-		-	-	-	-		PubMed	0	0
Cholesterol and triglyceride levels in first-episode psychosis: systematic review and meta-analysis.	Br J Psychiatry. 2017	28982658		0	-		-	-	-	-		PubMed	0	0
Acute strength training promotes responses in whole blood circulating levels of miR-146a among older adults with type 2 diabetes mellitus.	Clin Interv Aging. 2017	28979106		0	-		-	-	-	-		PubMed	0	0
Overview of the cardiovascular benefit with diabetic agents and novel combination products for type 2 diabetes.	Am J Manag Care. 2017	28978218		0	-		-	-	-	-		PubMed	0	0
Metabolomic biomarkers of pancreatic cancer: a meta-analysis study.	Oncotarget. 2017	28978166		0	-		-	-	-	-		PubMed	0	0
LEPR gene Gln223Arg polymorphism and type 2 diabetes mellitus: a meta-analysis of 3,367 subjects.	Oncotarget. 2017	28977915		0	-		-	-	-	-		PubMed	0	0
Diabetes Outcomes More than a Decade Following Sustained Weight Loss After Laparoscopic Adjustable Gastric Band Surgery.	Obes Surg. 2017	28975466		0	-		-	-	-	-		PubMed	0	0
Targeting Pioglitazone Hydrochloride Therapy After Stroke or Transient Ischemic Attack According to Pretreatment Risk for Stroke or Myocardial Infarction.	JAMA Neurol. 2017	28975241		0	-		-	-	-	-		PubMed	0	0
Plasma Concentrations of Per- and Polyfluoroalkyl Substances at Baseline and Associations with Glycemic Indicators and Diabetes Incidence among High-Risk Adults in the Diabetes Prevention Program Trial.	Environ Health Perspect. 2017	28974480		0	-		-	-	-	-		PubMed	0	0
Kringle IV Type 2, Not Low Lipoprotein(a), as a Cause of Diabetes: A Novel Genetic Approach Using SNPs Associated Selectively with Lipoprotein(a) Concentrations or with Kringle IV Type 2 Repeats.	Clin Chem. 2017	28971985		0	-		-	-	-	-		PubMed	0	0
The effectiveness of structured exercise in the south Asian population with type 2 diabetes: a systematic review.	Phys Sportsmed. 2017	28971713		0	-		-	-	-	-		PubMed	0	0
HDL cholesterol efflux normalised to apoA-I is associated with future development of type 2 diabetes: from the CORDIOPREV trial.	Sci Rep. 2017	28970513		0	-		-	-	-	-		PubMed	0	0
A comparison of adipose tissue interstitial glucose and venous blood glucose during postprandial resistance exercise in patients with type 2 diabetes.	J Appl Physiol (1985). 2017	28970202		0	-		-	-	-	-		PubMed	0	0
Association of isoflavone biomarkers with risk of chronic disease and mortality: a systematic review and meta-analysis of observational studies.	Nutr Rev. 2017	28969363		0	-		-	-	-	-		PubMed	0	0
Effect of yoga and aerobics exercise on sleep quality in women with Type 2 diabetes: a randomized controlled trial.	Sleep Sci. 2017	28966742		0	-		-	-	-	-		PubMed	0	0
The Effectiveness of Pharmacist Interventions on Cardiovascular Risk in Adult Patients with Type 2 Diabetes: The Multicentre Randomized Controlled R(x)EACH Trial.	Can J Diabetes. 2017	28965748		0	-		-	-	-	-		PubMed	0	0
Causal effects of cardiovascular risk factors on onset of major age-related diseases: A time-to-event Mendelian randomization study.	Exp Gerontol. 2017	28964830		0	-		-	-	-	-		PubMed	0	0
Value-Based Payments and Incentives to Improve Care: A Case Study of Patients with Type 2 Diabetes in Medicare Advantage.	Value Health. 2017	28964455		0	-		-	-	-	-		PubMed	0	0
Cinnamomum zeylanicum (Ceylon cinnamon) as a potential pharmaceutical agent for type-2 diabetes mellitus: study protocol for a randomized controlled trial.	Trials. 2017	28962661		0	-		-	-	-	-		PubMed	0	0
Metformin in combination with rosiglitazone contribute to the increased serum adiponectin levels in people with type 2 diabetes mellitus.	Exp Ther Med. 2017	28962190		0	-		-	-	-	-		PubMed	0	0
Effect of Butyrate and Inulin Supplementation on Glycemic Status, Lipid Profile and Glucagon-Like Peptide 1 Level in Patients with Type 2 Diabetes: A Randomized Double-Blind, Placebo-Controlled Trial.	Horm Metab Res. 2017	28962046		0	-		-	-	-	-		PubMed	0	0
Effect of a low glycemic index diet versus a high-cereal fibre diet on markers of subclinical cardiac injury in healthy individuals with type 2 diabetes mellitus: An exploratory analysis of a randomized dietary trial.	Clin Biochem. 2017	28958804		0	-		-	-	-	-		PubMed	0	0
Effectiveness of remote feedback on physical activity in persons with type 2 diabetes: A systematic review and meta-analysis of randomized controlled trials.	J Telemed Telecare. 2017	28958212		0	-		-	-	-	-		PubMed	0	0
Long-term Impact of Weight Loss Intervention on Changes in Cognitive Function: Exploratory Analyses from the Action for Health in Diabetes Randomized Controlled Clinical Trial.	J Gerontol A Biol Sci Med Sci. 2017	28958022		0	-		-	-	-	-		PubMed	0	0
Combined Ayurveda and Yoga Practices for Newly Diagnosed Type 2 Diabetes Mellitus: A Controlled Trial.	Complement Med Res. 2018	28957795		0	-		-	-	-	-		PubMed	0	0
A cost-controlling treatment strategy of adding liraglutide to insulin in type 2 diabetes.	Neth J Med. 2017	28956786		0	-		-	-	-	-		PubMed	0	0
Short-Term Supplementation of a Moderate Carbohydrate Diet with Psyllium Reduces Fasting Plasma Insulin and Tumor Necrosis Factor-Î± in Patients with Type 2 Diabetes Mellitus.	J Diet Suppl. 2017	28956658		0	-		-	-	-	-		PubMed	0	0
Enteroendocrine K and L cells in healthy and type 2 diabetic individuals.	Diabetologia. 2018	28956082		0	-		-	-	-	-		PubMed	0	0
A High-Carbohydrate, High-Fiber, Low-Fat Diet Results in Weight Loss among Adults at High Risk of Type 2 Diabetes.	J Nutr. 2017	28954840		0	-		-	-	-	-		PubMed	0	0
The Role of Obesity, Type 2 Diabetes, and Metabolic Factors in Pancreatic Cancer: A Mendelian Randomization Study.	J Natl Cancer Inst. 2017	28954281		0	-		-	-	-	-		PubMed	0	0
Prevalence of nonalcoholic fatty liver disease in patients with type 2 diabetes mellitus: A meta-analysis.	Medicine (Baltimore). 2017	28953675		0	-		-	-	-	-		PubMed	0	0
Self-reported hypoglycemia in insulin-treated patients with diabetes: Results from an international survey on 7289 patients from nine countries.	Diabetes Res Clin Pract. 2017	28951336		0	-		-	-	-	-		PubMed	0	0
Effects of testosterone supplementation therapy on lipid metabolism in hypogonadal men with T2DM: a meta-analysis of randomized controlled trials.	Andrology. 2018	28950433		0	-		-	-	-	-		PubMed	0	0
Addition of silymarin to renin-angiotensin system blockers in normotensive patients with type 2 diabetes mellitus and proteinuria: a prospective randomized trial.	Int Urol Nephrol. 2017	28948420		0	-		-	-	-	-		PubMed	0	0
Intensive Versus Standard Blood Pressure Control in SPRINT-Eligible Participants of ACCORD-BP.	Diabetes Care. 2017	28947569		0	-		-	-	-	-		PubMed	0	0
Effects of linagliptin vs. voglibose on daily glucose excursions during continuous glucose monitoring of Japanese type 2 diabetes patients (L-CGM): A randomized, open-label, two-arm, parallel comparative trial.	Diabetes Metab. 2017	28947255		0	-		-	-	-	-		PubMed	0	0
Circulating levels of miR-7, miR-152 and miR-192 respond to vitamin D supplementation in adults with prediabetes and correlate with improvements in glycemic control.	J Nutr Biochem. 2017	28945992		0	-		-	-	-	-		PubMed	0	0
Insulin degludec versus insulin glargine U100 for patients with type 1 or type 2 diabetes in the US: a budget impact analysis with rebate tables.	J Med Econ. 2018	28945173		0	-		-	-	-	-		PubMed	0	0
Effect of psychotherapy for depression via home telehealth on glycemic control in adults with type 2 diabetes: Subgroup analysis of a randomized clinical trial.	J Telemed Telecare. 2017	28945160		0	-		-	-	-	-		PubMed	0	0
Acute blood glucose, cardiovascular and exaggerated responses to high-intensity interval training and moderate-intensity continuous training in men with type 2 diabetes mellitus.	J Sports Med Phys Fitness. 2017	28944646		0	-		-	-	-	-		PubMed	0	0
The impact of pharmacist-led medication therapy management on medication adherence in patients with type 2 diabetes mellitus: a randomized controlled study.	Pharm Pract (Granada). 2017	28943985		0	-		-	-	-	-		PubMed	0	0
A Practical and Time-Efficient High-Intensity Interval Training Program Modifies Cardio-Metabolic Risk Factors in Adults with Risk Factors for Type II Diabetes.	Front Endocrinol (Lausanne). 2017	28943861		0	-		-	-	-	-		PubMed	0	0
Infection and Malignancy Outweigh Cardiovascular Mortality in Kidney Transplant Recipients: Post Hoc Analysis of the FAVORIT Trial.	Am J Med. 2018	28943384		0	-		-	-	-	-		PubMed	0	0
Single Nucleotide Polymorphism relevance learning with Random Forests for Type 2 diabetes risk prediction.	Artif Intell Med. 2017	28943335		0	-		-	-	-	-		PubMed	0	0
Vitamin D(3) supplementation decreases a unique circulating monocyte cholesterol pool in patients with type 2 diabetes.	J Steroid Biochem Mol Biol. 2017	28941998		0	-		-	-	-	-		PubMed	0	0
Different intervention strategies for preventing type 2 diabetes mellitus in China: A systematic review and network meta-analysis of randomized controlled trials.	Diabetes Obes Metab. 2017	28941313		0	-		-	-	-	-		PubMed	0	0
Peri-operative continuation of metformin does not improve glycaemic control in patients with type 2 diabetes: A randomized controlled trial.	Diabetes Obes Metab. 2017	28940961		0	-		-	-	-	-		PubMed	0	0
Household and familial resemblance in risk factors for type 2 diabetes and related cardiometabolic diseases in rural Uganda: a cross-sectional community sample.	BMJ Open. 2017	28939566		0	-		-	-	-	-		PubMed	0	0
Single-Dose Metformin Enhances Bile Acid-Induced Glucagon-Like Peptide-1 Secretion in Patients With Type 2 Diabetes.	J Clin Endocrinol Metab. 2017	28938439		0	-		-	-	-	-		PubMed	0	0
How people from ethnic minorities describe their experiences of managing type-2 diabetes mellitus: A qualitative meta-synthesis.	Int J Nurs Stud. 2017	28938105		0	-		-	-	-	-		PubMed	0	0
Role of structured individual patient education in the prevention of vascular complications in newly diagnosed type 2 diabetes: the INdividual Therapeutic Education in Newly Diagnosed type 2 diabetes (INTEND) randomized controlled trial.	Endocrine. 2017	28936586		0	-		-	-	-	-		PubMed	0	0
Probiotic reduces bacterial translocation in type 2 diabetes mellitus: A randomised controlled study.	Sci Rep. 2017	28935921		0	-		-	-	-	-		PubMed	0	0
Quality of life and sleep quality are similarly improved after aquatic or dry-land aerobic training in patients with type 2 diabetes: A randomized clinical trial.	J Sci Med Sport. 2017	28935128		0	-		-	-	-	-		PubMed	0	0
Effects of resveratrol supplementation on risk factors of non-communicable diseases: A meta-analysis of randomized controlled trials.	Crit Rev Food Sci Nutr. 2017	28933578		0	-		-	-	-	-		PubMed	0	0
A Prospective Single-Arm Trial of Modified Long Biliopancreatic and Short Alimentary Limbs Roux-En-Y Gastric Bypass in Type 2 Diabetes Patients with Mild Obesity.	Obes Surg. 2017	28933045		0	-		-	-	-	-		PubMed	0	0
Dose-Dependent Effect of Sitagliptin on Carotid Atherosclerosis in Patients with Type 2 Diabetes Mellitus Receiving Insulin Treatment: A Post Hoc Analysis.	Diabetes Ther. 2017	28933039		0	-		-	-	-	-		PubMed	0	0
Predictors of response to glucagon-like peptide-1 receptor agonists: a meta-analysis and systematic review of randomized controlled trials.	Acta Diabetol. 2017	28932989		0	-		-	-	-	-		PubMed	0	0
Effects of whole-body vibration therapy on perception thresholds of type 2 diabetic patients with peripheral neuropathy: a randomized controlled trial.	J Phys Ther Sci. 2017	28932013		0	-		-	-	-	-		PubMed	0	0
Genetic variation of habitual coffee consumption and glycemic changes in response to weight-loss diet intervention: the Preventing Overweight Using Novel Dietary Strategies (POUNDS LOST) trial.	Am J Clin Nutr. 2017	28931532		0	-		-	-	-	-		PubMed	0	0
Circulating retinol binding protein 4 levels in nonalcoholic fatty liver disease: a systematic review and meta-analysis.	Lipids Health Dis. 2017	28931435		0	-		-	-	-	-		PubMed	0	0
A Reassessment of the Marrubium Vulgare L. Herb's Potential Role in Diabetes Mellitus Type 2: First Results Guide the Investigation toward New Horizons.	Medicines (Basel). 2017	28930271		0	-		-	-	-	-		PubMed	0	0
Integrated management of atrial fibrillation including tailoring of anticoagulation in primary care: study design of the ALL-IN cluster randomised trial.	BMJ Open. 2017	28928175		0	-		-	-	-	-		PubMed	0	0
Identification of susceptible genes for complex chronic diseases based on disease risk functional SNPs and interaction networks.	J Biomed Inform. 2017	28927989		0	-		-	-	-	-		PubMed	0	0
Circulating magnesium levels and incidence of coronary heart diseases, hypertension, and type 2 diabetes mellitus: a meta-analysis of prospective cohort studies.	Nutr J. 2017	28927411		0	-		-	-	-	-		PubMed	0	0
Efficacy and safety of saxagliptin in combination with metformin as initial therapy in Chinese patients with type 2 diabetes: Results from the START study, a multicentre, randomized, double-blind, active-controlled, phase 3 trial.	Diabetes Obes Metab. 2017	28926170		0	-		-	-	-	-		PubMed	0	0
Erratum to: Microvascular effects of glucagon-like peptide-1 receptor agonists in type 2 diabetes: a meta-analysis of randomized controlled trials.	Acta Diabetol. 2017	28924916		0	-		-	-	-	-		PubMed	0	0
Evaluation of random plasma glucose for assessment of glycaemic control in type 2 diabetes mellitus.	J Pak Med Assoc. 2017	28924273		0	-		-	-	-	-		PubMed	0	0
Fructooligosaccharide (FOS) and Galactooligosaccharide (GOS) Increase Bifidobacterium but Reduce Butyrate Producing Bacteria with Adverse Glycemic Metabolism in healthy young population.	Sci Rep. 2017	28924143		0	-		-	-	-	-		PubMed	0	0
Is Chronic Dialysis the Right Hard Renal End Point To Evaluate Renoprotective Drug Effects?	Clin J Am Soc Nephrol. 2017	28923834		0	-		-	-	-	-		PubMed	0	0
Use of Prohibited Medication, a Potentially Overlooked Confounder in Clinical Trials: Omarigliptin (Once-weekly DPP-4 Inhibitor) Monotherapy Trial in 18- to 45-year-olds.	Clin Ther. 2017	28923291		0	-		-	-	-	-		PubMed	0	0
Trajectories of Glycemic Change in a National Cohort of Adults With Previously Controlled Type 2 Diabetes.	Med Care. 2017	28922296		0	-		-	-	-	-		PubMed	0	0
Oral glucose lowering with linagliptin and metformin compared with linagliptin alone as initial treatment in Asian patients with newly diagnosed type 2 diabetes and marked hyperglycemia: Subgroup analysis of a randomized clinical trial.	J Diabetes Investig. 2017	28921919		0	-		-	-	-	-		PubMed	0	0
Weekly glucagon-like peptide-1 receptor agonist albiglutide as monotherapy improves glycemic parameters in Japanese patients with type 2 diabetes mellitus: A randomized, double-blind, placebo-controlled study.	J Diabetes Investig. 2017	28921915		0	-		-	-	-	-		PubMed	0	0
Biphasic insulin aspart-30 reduces glycemic variability to a greater degree than insulin detemir: A randomized controlled trial of once-daily insulin regimens using continuous glucose monitoring.	J Diabetes Investig. 2017	28921908		0	-		-	-	-	-		PubMed	0	0
Efficacy and safety of switching from basal insulin to once-daily insulin degludec/insulin aspart in Japanese patients with inadequately controlled type 2 diabetes: A 4-week, randomized, open-label, treat-to-target study.	J Diabetes Investig. 2017	28921900		0	-		-	-	-	-		PubMed	0	0
Efficacy and safety of the addition of ertugliflozin in patients with type 2 diabetes mellitus inadequately controlled with metformin and sitagliptin: The VERTIS SITA2 placebo-controlled randomized study.	Diabetes Obes Metab. 2017	28921862		0	-		-	-	-	-		PubMed	0	0
Coronary artery bypass grafting versus percutaneous coronary intervention in patients with noninsulin treated type 2 diabetes mellitus: A meta-analysis of randomized controlled trials.	Diabetes Metab Res Rev. 2018	28921837		0	-		-	-	-	-		PubMed	0	0
The effect of high-dose vitamin D(3) supplementation on bone mineral density in subjects with prediabetes.	Osteoporos Int. 2018	28921338		0	-		-	-	-	-		PubMed	0	0
Effects of Vildagliptin Add-on Insulin Therapy on Nocturnal Glycemic Variations in Uncontrolled Type 2 Diabetes.	Diabetes Ther. 2017	28921310		0	-		-	-	-	-		PubMed	0	0
Efficacy and safety of dapagliflozin in patients with inadequately controlled type 1 diabetes (DEPICT-1): 24 week results from a multicentre, double-blind, phase 3, randomised controlled trial.	Lancet Diabetes Endocrinol. 2017	28919061		0	-		-	-	-	-		PubMed	0	0
Effects of acarbose on cardiovascular and diabetes outcomes in patients with coronary heart disease and impaired glucose tolerance (ACE): a randomised, double-blind, placebo-controlled trial.	Lancet Diabetes Endocrinol. 2017	28917545		0	-		-	-	-	-		PubMed	0	0
Short-term effect of add on bell pepper (Capsicum annuum var. grossum) juice with integrated approach of yoga therapy on blood glucose levels and cardiovascular functions in patients with type 2 diabetes mellitus: A randomized controlled study.	Complement Ther Med. 2017	28917374		0	-		-	-	-	-		PubMed	0	0
Energy intake in the first week in an emergency intensive care unit may not influence clinical outcomes in critically ill, overweight Japanese patients.	Asia Pac J Clin Nutr. 2017	28917226		0	-		-	-	-	-		PubMed	0	0
Flaxseed Oil Supplementation Improve Gene Expression Levels of PPAR-Î³, LP(a), IL-1 and TNF-Î± in Type 2 Diabetic Patients with Coronary Heart Disease.	Lipids. 2017	28916975		0	-		-	-	-	-		PubMed	0	0
Effects of Anthocyanins on Cardiometabolic Health: A Systematic Review and Meta-Analysis of Randomized Controlled Trials.	Adv Nutr. 2017	28916569		0	-		-	-	-	-		PubMed	0	0
Pleiotropic effects of metformin to rescue statin-induced muscle injury and insulin resistance: A proposed mechanism and potential clinical implications.	Med Hypotheses. 2017	28915960		0	-		-	-	-	-		PubMed	0	0
Reverse Message-Framing Effects on Accelerometer-Assessed Physical Activity Among Older Outpatients With Type 2 Diabetes.	J Sport Exerc Psychol. 2017	28915067		0	-		-	-	-	-		PubMed	0	0
Testosterone therapy preserves muscle strength and power in aging men with type 2 diabetes-a randomized controlled trial.	Andrology. 2017	28914503		0	-		-	-	-	-		PubMed	0	0
A new complementary approach for oral health and diabetes management: health coaching.	Int Dent J. 2018	28913928		0	-		-	-	-	-		PubMed	0	0
Improved Glycemic Control in a Patient Group Performing 7-Point Profile Self-Monitoring of Blood Glucose and Intensive Data Documentation: An Open-Label, Multicenter, Observational Study.	Diabetes Ther. 2017	28913822		0	-		-	-	-	-		PubMed	0	0
Devoting attention to glucose variability and hypoglycaemia in type 2 diabetes.	Diabetologia. 2018	28913602		0	-		-	-	-	-		PubMed	0	0
Day-to-day fasting glycaemic variability in DEVOTE: associations with severe hypoglycaemia and cardiovascular outcomes (DEVOTE 2).	Diabetologia. 2018	28913575		0	-		-	-	-	-		PubMed	0	0
DEVOTE 3: temporal relationships between severe hypoglycaemia, cardiovascular outcomes and mortality.	Diabetologia. 2018	28913543		0	-		-	-	-	-		PubMed	0	0
Cardiometabolic effects of a novel SIRT1 activator, SRT2104, in people with type 2 diabetes mellitus.	Open Heart. 2017	28912956		0	-		-	-	-	-		PubMed	0	0
Effects of Dapagliflozin on Body Composition and Liver Tests in Patients with Nonalcoholic Steatohepatitis Associated with Type 2 Diabetes Mellitus: A Prospective, Open-label, Uncontrolled Study.	Curr Ther Res Clin Exp. 2017	28912902		0	-		-	-	-	-		PubMed	0	0
A crossover study of the combination therapy of metformin and exenatide or biphasic insulin aspart 30 in overweight or obese patients newly diagnosed with type 2 diabetes mellitus.	Exp Ther Med. 2017	28912879		0	-		-	-	-	-		PubMed	0	0
Effects of Liraglutide on Weight Loss, Fat Distribution, and Î²-Cell Function in Obese Subjects With Prediabetes or Early Type 2 Diabetes.	Diabetes Care. 2017	28912305		0	-		-	-	-	-		PubMed	0	0
Effectiveness of a multifactorial intervention based on an application for smartphones, heart-healthy walks and a nutritional workshop in patients with type 2 diabetes mellitus in primary care (EMID): study protocol for a randomised controlled trial.	BMJ Open. 2017	28912193		0	-		-	-	-	-		PubMed	0	0
Trans-ethnic meta-regression of genome-wide association studies accounting for ancestry increases power for discovery and improves fine-mapping resolution.	Hum Mol Genet. 2017	28911207		0	-		-	-	-	-		PubMed	0	0
Differential Associations of Inflammatory Markers With Insulin Sensitivity and Secretion: The Prospective METSIM Study.	J Clin Endocrinol Metab. 2017	28911155		0	-		-	-	-	-		PubMed	0	0
Efficacy and safety of alirocumab in insulin-treated individuals with type 1 or type 2 diabetes and high cardiovascular risk: The ODYSSEY DM-INSULIN randomized trial.	Diabetes Obes Metab. 2017	28905478		0	-		-	-	-	-		PubMed	0	0
Decline of insulin therapy and delays in insulin initiation in people with uncontrolled diabetes mellitus.	Diabet Med. 2017	28905434		0	-		-	-	-	-		PubMed	0	0
Metabolic syndrome severity score: range and associations with cardiovascular risk factors.	Arch Med Sci Atheroscler Dis. 2016	28905027		0	-		-	-	-	-		PubMed	0	0
Efficacy and safety of subgroup analysis stratified by baseline HbA1c in a Japanese phase 3 study of dulaglutide 0.75 mg compared with insulin glargine in patients with type 2 diabetes.	Endocr J. 2017	28904247		0	-		-	-	-	-		PubMed	0	0
Association between metformin and the risk of gastric cancer in patients with type 2 diabetes mellitus: a meta-analysis of cohort studies.	Oncotarget. 2017	28903449		0	-		-	-	-	-		PubMed	0	0
Bradykinin, insulin, and glycemia responses to exercise performed above and below lactate threshold in individuals with type 2 diabetes.	Braz J Med Biol Res. 2017	28902927		0	-		-	-	-	-		PubMed	0	0
Efficacy and safety of saxagliptin in combination with insulin in Japanese patients with type 2 diabetes mellitus: a 16-week double-blind randomized controlled trial with a 36-week open-label extension.	Expert Opin Pharmacother. 2017	28901796		0	-		-	-	-	-		PubMed	0	0
Development of a structured diabetes self-management education program specific to the cultural and ethnic population of New Zealand.	Nutr Diet. 2017	28901703		0	-		-	-	-	-		PubMed	0	0
MicroRNAâ€‘106b regulates skeletal muscle insulin sensitivity and glucose homeostasis by targeting mitofusionâ€‘2.	Mol Med Rep. 2017	28901427		0	-		-	-	-	-		PubMed	0	0
Dipeptidyl Peptidase-4 Inhibitors and Risk of Heart Failure in Patients With Type 2 Diabetes Mellitus: A Population-Based Cohort Study.	Circ Heart Fail. 2017	28899989		0	-		-	-	-	-		PubMed	0	0
The mixed benefit of low lipoprotein(a) in type 2 diabetes.	Lipids Health Dis. 2017	28899393		0	-		-	-	-	-		PubMed	0	0
Characterizing adults with Type 2 diabetes mellitus and intellectual disability: outcomes of a case-finding study.	Diabet Med. 2017	28898445		0	-		-	-	-	-		PubMed	0	0
Impact of common genetic determinants of Hemoglobin A1c on type 2 diabetes risk and diagnosis in ancestrally diverse populations: A transethnic genome-wide meta-analysis.	PLoS Med. 2017	28898252		0	-		-	-	-	-		PubMed	0	0
Type 2 diabetes and cardiovascular prevention: the dogmas disputed.	Endocrine. 2017	28895030		0	-		-	-	-	-		PubMed	0	0
Partitioning of adipose lipid metabolism by altered expression and function of PPAR isoforms after bariatric surgery.	Int J Obes (Lond). 2018	28894292		0	-		-	-	-	-		PubMed	0	0
JinqiJiangtang tablets for pre-diabetes: A randomized, double-blind and placebo-controlled clinical trial.	Sci Rep. 2017	28894283		0	-		-	-	-	-		PubMed	0	0
Association between carotid plaque characteristics and acute cerebral infarction determined by MRI in patients with type 2 diabetes mellitus.	Cardiovasc Diabetol. 2017	28893252		0	-		-	-	-	-		PubMed	0	0
A randomized, placebo-controlled study of the cardiovascular safety of the once-weekly DPP-4 inhibitor omarigliptin in patients with type 2 diabetes mellitus.	Cardiovasc Diabetol. 2017	28893244		0	-		-	-	-	-		PubMed	0	0
Effect of Sugar-Free and Regular Toothpaste on Salivary Glucose and pH among Type 2 Diabetes- A Randomized Crossover Trial.	J Clin Diagn Res. 2017	28893048		0	-		-	-	-	-		PubMed	0	0
Investigating a biomarker-driven approach to target collagen turnover in diabetic heart failure with preserved ejection fraction patients. Effect of torasemide vs. furosemide on serum C-terminal propeptide of procollagen type I (DROP-PIP trial).	Eur J Heart Fail. 2017	28891228		0	-		-	-	-	-		PubMed	0	0
Trial of Amiloride in Type 2 Diabetes with Proteinuria.	Kidney Int Rep. 2017	28890943		0	-		-	-	-	-		PubMed	0	0
Immediate Effect of Needling at CV-12 (Zhongwan) Acupuncture Point on Blood Glucose Level in Patients with Type 2 Diabetes Mellitus: A Pilot Randomized Placebo-Controlled Trial.	J Acupunct Meridian Stud. 2017	28889840		0	-		-	-	-	-		PubMed	0	0
The role of glycaemic and lipid risk factors in mediating the effect of BMI on coronary heart disease: a two-step, two-sample Mendelian randomisation study.	Diabetologia. 2017	28889241		0	-		-	-	-	-		PubMed	0	0
Hypoglycemia awareness among insulin-treated patients with diabetes in Malaysia: A cohort subanalysis of the HAT study.	Diabetes Res Clin Pract. 2017	28888148		0	-		-	-	-	-		PubMed	0	0
Integrating smartphone technology, social support and the outdoor physical environment to improve fitness among adults at risk of, or diagnosed with, Type 2 Diabetes: Findings from the 'eCoFit' randomized controlled trial.	Prev Med. 2017	28887192		0	-		-	-	-	-		PubMed	0	0
Radix Puerariae and Fructus Crataegi mixture inhibits renal injury in type 2 diabetes via decreasing of AKT/PI3K.	BMC Complement Altern Med. 2017	28886733		0	-		-	-	-	-		PubMed	0	0
Effect of dragon fruit on glycemic control in prediabetes and type 2 diabetes: A systematic review and meta-analysis.	PLoS One. 2017	28886195		0	-		-	-	-	-		PubMed	0	0
Clomiphene citrate effect in obese men with low serum testosterone treated with metformin due to dysmetabolic disorders: A randomized, double-blind, placebo-controlled study.	PLoS One. 2017	28886024		0	-		-	-	-	-		PubMed	0	0
Effects of Cinnamon Consumption on Glycemic Indicators, Advanced Glycation End Products, and Antioxidant Status in Type 2 Diabetic Patients.	Nutrients. 2017	28885566		0	-		-	-	-	-		PubMed	0	0
Combination therapy of metformin plus dipeptidyl peptidase-4 inhibitor versus metformin plus sulfonylurea and their association with a decreased risk of cardiovascular disease in type 2 diabetes mellitus patients.	Medicine (Baltimore). 2017	28885325		0	-		-	-	-	-		PubMed	0	0
Galacto-oligosaccharides ameliorate dysbiotic Bifidobacteriaceae decline in Japanese patients with type 2 diabetes.	Benef Microbes. 2017	28884590		0	-		-	-	-	-		PubMed	0	0
Probiotic Soy Milk Consumption and Renal Function Among Type 2 Diabetic Patients with Nephropathy: a Randomized Controlled Clinical Trial.	Probiotics Antimicrob Proteins. 2017	28884306		0	-		-	-	-	-		PubMed	0	0
Impact of post-meal and one-time daily exercise in patient with type 2 diabetes mellitus: a randomized crossover study.	Diabetol Metab Syndr. 2017	28883892		0	-		-	-	-	-		PubMed	0	0
Helicobacter pylori Infection Is Associated with Type 2 Diabetes, Not Type 1 Diabetes: An Updated Meta-Analysis.	Gastroenterol Res Pract. 2017	28883831		0	-		-	-	-	-		PubMed	0	0
The HAT TRICK programme for improving physical activity, healthy eating and connectedness among overweight, inactive men: study protocol of a pragmatic feasibility trial.	BMJ Open. 2017	28882920		0	-		-	-	-	-		PubMed	0	0
Awareness and practices regarding eye diseases among patients with diabetes: a cross sectional analysis of the CoDiab-VD cohort.	BMC Endocr Disord. 2017	28882117		0	-		-	-	-	-		PubMed	0	0
Pharmacological management of type 2 diabetes: what's new in 2017?	Expert Rev Clin Pharmacol. 2017	28879786		0	-		-	-	-	-		PubMed	0	0
Postauthorization safety study of the DPP-4 inhibitor saxagliptin: a large-scale multinational family of cohort studies of five outcomes.	BMJ Open Diabetes Res Care. 2017	28878934		0	-		-	-	-	-		PubMed	0	0
Individuals at high risk for type 2 diabetes invited to a lifestyle program: characteristics of participants versus non-participants (the HUNT Study) and 24-month follow-up of participants (the VEND-RISK Study).	BMJ Open Diabetes Res Care. 2017	28878932		0	-		-	-	-	-		PubMed	0	0
Randomized controlled trial for assessment of Internet of Things system to guide intensive glucose control in diabetes outpatients: Nagoya Health Navigator Study protocol.	Nagoya J Med Sci. 2017	28878437		0	-		-	-	-	-		PubMed	0	0
Effect of text messages to improve health literacy on medication adherence in patients with type 2 diabetes mellitus: A randomized controlled pilot trial.	Nagoya J Med Sci. 2017	28878436		0	-		-	-	-	-		PubMed	0	0
Dietary Protein Consumption and the Risk of Type 2 Diabetes: A Systematic Review and Meta-Analysis of Cohort Studies.	Nutrients. 2017	28878172		0	-		-	-	-	-		PubMed	0	0
Plasma Concentrations of Afamin Are Associated With Prevalent and Incident Type 2 Diabetes: A Pooled Analysis in More Than 20,000 Individuals.	Diabetes Care. 2017	28877915		0	-		-	-	-	-		PubMed	0	0
Modulation of both Insulin Resistance and Cancer Growth by Inositol.	Curr Pharm Des. 2017	28875849		0	-		-	-	-	-		PubMed	0	0
Sprint interval training decreases left-ventricular glucose uptake compared to moderate-intensity continuous training in subjects with type 2 diabetes or prediabetes.	Sci Rep. 2017	28874821		0	-		-	-	-	-		PubMed	0	0
Considerations for pediatric trial designs and analyses.	J Biopharm Stat. 2017	28872409		0	-		-	-	-	-		PubMed	0	0
Inflammatory Response Occurs in Veins of Broiler Chickens Treated with a Selenium Deficiency Diet.	Biol Trace Elem Res. 2017	28871485		0	-		-	-	-	-		PubMed	0	0
Recent Insights into Pharmacologic Cardiovascular Risk Reduction in Type 2 Diabetes Mellitus.	Cardiovasc Drugs Ther. 2017	28871349		0	-		-	-	-	-		PubMed	0	0
Real-world use and modeled impact of glucose-lowering therapies evaluated in recent cardiovascular outcomes trials: An NCDRÂ® Research to Practice project.	Eur J Prev Cardiol. 2017	28870145		0	-		-	-	-	-		PubMed	0	0
Cost analysis of bariatric surgery in Denmark made with a decision-analytic model.	Dan Med J. 2017	28869031		0	-		-	-	-	-		PubMed	0	0
The Healthy Hearts and Kidneys (HHK) study: Design of a 2Ã—2 RCT of technology-supported self-monitoring and social cognitive theory-based counseling to engage overweight people with diabetes and chronic kidney disease in multiple lifestyle changes.	Contemp Clin Trials. 2018	28867396		0	-		-	-	-	-		PubMed	0	0
Association between lipoprotein(a) level and type 2 diabetes: no evidence for a causal role of lipoprotein(a) and insulin.	Acta Diabetol. 2017	28866807		0	-		-	-	-	-		PubMed	0	0
Does supplementation with carnosine improve cardiometabolic health and cognitive function in patients with pre-diabetes and type 2 diabetes? study protocol for a randomised, double-blind, placebo-controlled trial.	BMJ Open. 2017	28864708		0	-		-	-	-	-		PubMed	0	0
High-energy breakfast based on whey protein reduces body weight, postprandial glycemia and HbA(1C) in Type 2 diabetes.	J Nutr Biochem. 2017	28863364		0	-		-	-	-	-		PubMed	0	0
Prevalence of lipohypertrophy in insulin-treated diabetes patients: A systematic review and meta-analysis.	J Diabetes Investig. 2017	28862814		0	-		-	-	-	-		PubMed	0	0
Better glycaemic control and less hypoglycaemia with insulin glargine 300 U/mL vs glargine 100 U/mL: 1-year patient-level meta-analysis of the EDITION clinical studies in people with type 2 diabetes.	Diabetes Obes Metab. 2017	28862801		0	-		-	-	-	-		PubMed	0	0
Impact on dietary intake of a self-directed, gender-tailored diabetes prevention program in men.	World J Diabetes. 2017	28861179		0	-		-	-	-	-		PubMed	0	0
Multi-parameter comparison of a standardized mixed meal tolerance test in healthy and type 2 diabetic subjects: the PhenFlex challenge.	Genes Nutr. 2017	28861127		0	-		-	-	-	-		PubMed	0	0
Does diabetes impact therapeutic immunomodulation therapy decisions for kidney transplant recipients? Data from the Folic Acid for Vascular Outcome Reduction in Transplant (FAVORIT) trial.	Int J Nephrol Renovasc Dis. 2017	28860838		0	-		-	-	-	-		PubMed	0	0
Effectiveness of a diabetes mellitus pictorial diary handbook program for middle-aged and elderly type 2 diabetes mellitus patients: a quasi-experimental study at Taladnoi Primary Care Unit, Saraburi, Thailand.	J Multidiscip Healthc. 2017	28860800		0	-		-	-	-	-		PubMed	0	0
Patients' understanding is the problem": physicians' views of nonadherence among Arabs with type 2 diabetes.	Patient Prefer Adherence. 2017	28860724		0	-		-	-	-	-		PubMed	0	0
Development and validation of a risk prediction model for end-stage renal disease in patients with type 2 diabetes.	Sci Rep. 2017	28860599		0	-		-	-	-	-		PubMed	0	0
Telemonitoring in fasting individuals with Type 2 Diabetes Mellitus during Ramadan: A prospective, randomised controlled study.	Sci Rep. 2017	28860546		0	-		-	-	-	-		PubMed	0	0
Effect of Family-Based Education on the Quality of Life of Persons With Type 2 Diabetes: A Randomized Clinical Trial.	J Nurs Res. 2018	28858971		0	-		-	-	-	-		PubMed	0	0
The acute effect of coffee on endothelial function and glucose metabolism following a glucose load in healthy human volunteers.	Food Funct. 2017	28858362		0	-		-	-	-	-		PubMed	0	0
Diabetes mellitus carries a risk of esophageal cancer: A meta-analysis.	Medicine (Baltimore). 2017	28858123		0	-		-	-	-	-		PubMed	0	0
Comparative assessment of the efficacy and safety of acarbose and metformin combined with premixed insulin in patients with type 2 diabetes mellitus.	Medicine (Baltimore). 2017	28858080		0	-		-	-	-	-		PubMed	0	0
Effect of ertugliflozin on glucose control, body weight, blood pressure and bone density in type 2 diabetes mellitus inadequately controlled on metformin monotherapy (VERTIS MET).	Diabetes Obes Metab. 2017	28857451		0	-		-	-	-	-		PubMed	0	0
Mortality and Cardiovascular Complications in Older Complex Chronic Patients with Type 2 Diabetes.	Biomed Res Int. 2017	28856160		0	-		-	-	-	-		PubMed	0	0
Plasma glucose and insulin responses after consumption of breakfasts with different sources of soluble fiber in type 2 diabetes patients: a randomized crossover clinical trial.	Am J Clin Nutr. 2017	28855225		0	-		-	-	-	-		PubMed	0	0
Effect of Incorporating Bay Leaves in Cookies on Postprandial Glycemia, Appetite, Palatability, and Gastrointestinal Well-Being.	J Am Coll Nutr. 2017	28853992		0	-		-	-	-	-		PubMed	0	0
Self-care, quality of life and clinical outcomes of type 2 diabetes patients: an observational cross-sectional study.	Acta Diabetol. 2017	28852863		0	-		-	-	-	-		PubMed	0	0
A pragmatic lifestyle modification programme reduces the incidence of predictors of cardio-metabolic disease and dysglycaemia in a young healthy urban South Asian population: a randomised controlled trial.	BMC Med. 2017	28851373		0	-		-	-	-	-		PubMed	0	0
Tolerability of canagliflozin in patients with type 2 diabetes mellitus fasting during Ramadan: Results of the Canagliflozin in Ramadan Tolerance Observational Study (CRATOS).	Int J Clin Pract. 2017	28851109		0	-		-	-	-	-		PubMed	0	0
Is Cognitive Behavioural Therapy focusing on Depression and Anxiety Effective for People with Long-Term Physical Health Conditions? A Controlled Trial in the Context of Type 2 Diabetes Mellitus.	Behav Cogn Psychother. 2017	28849755		0	-		-	-	-	-		PubMed	0	0
Lower Extremity Skeletal Muscle Mass, but Not Upper Extremity Skeletal Muscle Mass, Is Inversely Associated with Hospitalization in Patients with Type 2 Diabetes.	J Diabetes Res. 2017	28848767		0	-		-	-	-	-		PubMed	0	0
The Look AHEAD Trial: Translating Lessons Learned Into Clinical Practice and Further Study.	Diabetes Spectr. 2017	28848309		0	-		-	-	-	-		PubMed	0	0
A Mendelian Randomization Study of Metabolite Profiles, Fasting Glucose, and Type 2 Diabetes.	Diabetes. 2017	28847883		0	-		-	-	-	-		PubMed	0	0
Effects of sodium-glucose co-transporter 2 (SGLT2) inhibitors on serum uric acid level: A meta-analysis of randomized controlled trials.	Diabetes Obes Metab. 2018	28846182		0	-		-	-	-	-		PubMed	0	0
Homeostatic model assessment of beta cell function predicting abnormal oral glucose tolerance testing in pregnancy: a systematic review and meta-analysis.	Gynecol Endocrinol. 2017	28846055		0	-		-	-	-	-		PubMed	0	0
Oral Antidiabetic Agents and Cardiovascular Outcomes.	Curr Probl Cardiol. 2017	28844525		0	-		-	-	-	-		PubMed	0	0
Changing psychosocial determinants of physical activity and diet in women with a history of gestational diabetes mellitus.	Diabetes Metab Res Rev. 2018	28843034		0	-		-	-	-	-		PubMed	0	0
Diabetes primary prevention program: New insights from data analysis of recruitment period.	Diabetes Metab Res Rev. 2018	28843031		0	-		-	-	-	-		PubMed	0	0
Glucose effectiveness, but not insulin sensitivity, is improved after short-term interval training in individuals with type 2 diabetes mellitus: a controlled, randomised, crossover trial.	Diabetologia. 2017	28842722		0	-		-	-	-	-		PubMed	0	0
Fecal Microbiota Transplantation: Therapeutic Potential for a Multitude of Diseases beyond Clostridium difficile.	Microbiol Spectr. 2017	28840809		0	-		-	-	-	-		PubMed	0	0
Reduction in microalbuminuria by calcium channel blockers in patients with type 2 diabetes mellitus and hypertension-A randomized, open-label, active-controlled, superiority, parallel-group clinical trial.	Int J Clin Pract. 2017	28840637		0	-		-	-	-	-		PubMed	0	0
Laparoscopic Sleeve Gastrectomy Versus Banded Roux-en-Y Gastric Bypass for Diabetes and Obesity: a Prospective Randomised Double-Blind Trial.	Obes Surg. 2018	28840525		0	-		-	-	-	-		PubMed	0	0
Antithrombotic potency of ticagrelor versus clopidogrel in type-2 diabetic patients with cardiovascular disease.	Thromb Haemost. 2017	28837213		0	-		-	-	-	-		PubMed	0	0
Adding prandial GLP-1 receptor agonists to basal insulin: a promising option for type 2 diabetes therapy.	Curr Med Res Opin. 2018	28836861		0	-		-	-	-	-		PubMed	0	0
Optimizing the Treatment of Steroid-Induced Hyperglycemia.	Ann Pharmacother. 2018	28836444		0	-		-	-	-	-		PubMed	0	0
Periodontal treatment modulates gene expression of endothelial progenitor cells in diabetic patients.	J Clin Periodontol. 2017	28836285		0	-		-	-	-	-		PubMed	0	0
Association of obesity and diabetes with thyroid nodules.	Endocrine. 2017	28836113		0	-		-	-	-	-		PubMed	0	0
Does dapagliflozin regress left ventricular hypertrophy in patients with type 2 diabetes? A prospective, double-blind, randomised, placebo-controlled study.	BMC Cardiovasc Disord. 2017	28835229		0	-		-	-	-	-		PubMed	0	0
Primary analysis of the Mandarin-speaking sub-study within the Sydney diabetes prevention program.	Diabetes Res Clin Pract. 2017	28834772		0	-		-	-	-	-		PubMed	0	0
Longitudinal Assessment of the Effect of Atrasentan on Thoracic Bioimpedance in Diabetic Nephropathy: A Randomized, Double-Blind, Placebo-Controlled Trial.	Drugs R D. 2017	28831752		0	-		-	-	-	-		PubMed	0	0
Effect of screening for type 2 diabetes on risk of cardiovascular disease and mortality: a controlled trial among 139,075 individuals diagnosed with diabetes in Denmark between 2001 and 2009.	Diabetologia. 2017	28831539		0	-		-	-	-	-		PubMed	0	0
Does the evidence support population-wide screening for type 2 diabetes? No.	Diabetologia. 2017	28831520		0	-		-	-	-	-		PubMed	0	0
Composite Primary End Points in Cardiovascular Outcomes Trials Involving Type 2 Diabetes Patients: Should Unstable Angina Be Included in the Primary End Point?	Diabetes Care. 2017	28830955		0	-		-	-	-	-		PubMed	0	0
Influences of Breakfast on Clock Gene Expression and Postprandial Glycemia in Healthy Individuals and Individuals With Diabetes: A Randomized Clinical Trial.	Diabetes Care. 2017	28830875		0	-		-	-	-	-		PubMed	0	0
Promoting Engagement With a Digital Health Intervention (HeLP-Diabetes) Using Email and Text Message Prompts: Mixed-Methods Study.	Interact J Med Res. 2017	28829328		0	-		-	-	-	-		PubMed	0	0
Effect of Dapagliflozin on Glycemic Control, Weight, and Blood Pressure in Patients with Type 2 Diabetes Attending a Specialist Endocrinology Practice in Canada: A Retrospective Cohort Analysis.	Diabetes Technol Ther. 2017	28829163		0	-		-	-	-	-		PubMed	0	0
Continuous Glucose Monitoring Versus Usual Care in Patients With Type 2 Diabetes Receiving Multiple Daily Insulin Injections: A Randomized Trial.	Ann Intern Med. 2017	28828487		0	-		-	-	-	-		PubMed	0	0
Effects of ABCA1 R219K Polymorphism and Serum Lipid Profiles on Mild Cognitive Impairment in Type 2 Diabetes Mellitus.	Front Aging Neurosci. 2017	28824418		0	-		-	-	-	-		PubMed	0	0
Comparison of tofogliflozin 20 mg and ipragliflozin 50 mg used together with insulin glargine 300 U/mL using continuous glucose monitoring (CGM): A randomized crossover study.	Endocr J. 2017	28824042		0	-		-	-	-	-		PubMed	0	0
Effect of canagliflozin on circulating active GLP-1 levels in patients with type 2 diabetes: a randomized trial.	Endocr J. 2017	28824041		0	-		-	-	-	-		PubMed	0	0
Effect of a Behavioral Intervention Strategy for Adoption and Maintenance of a Physically Active Lifestyle: The Italian Diabetes and Exercise Study 2 (IDES_2): A Randomized Controlled Trial.	Diabetes Care. 2017	28821576		0	-		-	-	-	-		PubMed	0	0
Efficacy and Safety of Linagliptin in 2681 Asian Patients Stratified by Age, Obesity, and Renal Function: A Pooled Analysis of Randomized Clinical Trials.	Adv Ther. 2017	28819835		0	-		-	-	-	-		PubMed	0	0
Efficacy and Safety of Diacerein in Patients With Inadequately Controlled Type 2 Diabetes: A Randomized Controlled Trial.	Diabetes Care. 2017	28818994		0	-		-	-	-	-		PubMed	0	0
Hypoglycemia Risk Related to Double Dose Is Markedly Reduced with Basal Insulin Peglispro Versus Insulin Glargine in Patients with Type 2 Diabetes Mellitus in a Randomized Trial: IMAGINE 8.	Diabetes Technol Ther. 2017	28817342		0	-		-	-	-	-		PubMed	0	0
Nil Whey Protein Effect on Glycaemic Control after Intense Mixed-Mode Training in T2D.	Med Sci Sports Exerc. 2017	28816922		0	-		-	-	-	-		PubMed	0	0
Effects of a liquid high-fat meal on postprandial lipid metabolism in type 2 diabetic patients with abdominal obesity.	Nutr Metab (Lond). 2017	28814963		0	-		-	-	-	-		PubMed	0	0
Circulating zinc-Î±2-glycoprotein levels are low in newly diagnosed patients with metabolic syndrome and correlate with adiponectin.	Nutr Metab (Lond). 2017	28814962		0	-		-	-	-	-		PubMed	0	0
Benefits of SGLT2 Inhibitors beyond glycemic control - A focus on metabolic, cardiovascular, and renal outcomes.	Curr Diabetes Rev. 2017	28814245		0	-		-	-	-	-		PubMed	0	0
Effects of telemonitoring on glycaemic control and healthcare costs in type 2 diabetes: A randomised controlled trial.	J Telemed Telecare. 2017	28814128		0	-		-	-	-	-		PubMed	0	0
Effect of continuous positive airway pressure on glucose metabolism in adults with type 2 diabetes: a systematic review and meta-analysis of randomized controlled trials.	Sleep Breath. 2017	28812180		0	-		-	-	-	-		PubMed	0	0
Serum Betatrophin Levels and Clinical Features in Patients With Poorly Controlled Type 2 Diabetes.	J Clin Med Res. 2017	28811856		0	-		-	-	-	-		PubMed	0	0
Effects of supervised structured aerobic exercise training program on fasting blood glucose level, plasma insulin level, glycemic control, and insulin resistance in type 2 diabetes mellitus.	Pak J Med Sci. 2017	28811774		0	-		-	-	-	-		PubMed	0	0
Dipeptidyl peptidase-4 inhibitors and cancer risk in patients with type 2 diabetes: a meta-analysis of randomized clinical trials.	Sci Rep. 2017	28811622		0	-		-	-	-	-		PubMed	0	0
Sleep Duration and Risk of Type 2 Diabetes.	Pediatrics. 2017	28811317		0	-		-	-	-	-		PubMed	0	0
Effect of an Intensive Lifestyle Intervention on Glycemic Control in Patients With Type 2 Diabetes: A Randomized Clinical Trial.	JAMA. 2017	28810024		0	-		-	-	-	-		PubMed	0	0
Prognostic Usefulness of Cardiac Stress Test Modalities in Patients With Type 2 Diabetes Mellitus Who Underwent Myocardial Perfusion Scintigraphy (from the Basel Asymptomatic High-Risk Diabetics' Outcome Trial).	Am J Cardiol. 2017	28807404		0	-		-	-	-	-		PubMed	0	0
Hesperidin Supplementation Alleviates Oxidative DNA Damage and Lipid Peroxidation in Type 2 Diabetes: A Randomized Double-Blind Placebo-Controlled Clinical Trial.	Phytother Res. 2017	28805022		0	-		-	-	-	-		PubMed	0	0
Understanding Design Tradeoffs for Health Technologies: A Mixed-Methods Approach.	Proc SIGCHI Conf Hum Factor Comput Syst. 2015	28804794		0	-		-	-	-	-		PubMed	0	0
An innovative sealed shoe to off-load and heal diabetic forefoot ulcers - a feasibility study.	Diabet Foot Ankle. 2017	28804593		0	-		-	-	-	-		PubMed	0	0
Development and validation of Risk Equations for Complications Of type 2 Diabetes (RECODe) using individual participant data from randomised trials.	Lancet Diabetes Endocrinol. 2017	28803840		0	-		-	-	-	-		PubMed	0	0
TITRATION: A Randomized Study to Assess 2 Treatment Algorithms with New Insulin Glargine 300 units/mL.	Can J Diabetes. 2017	28803820		0	-		-	-	-	-		PubMed	0	0
Nutrition Facts Panel use is associated with diet quality and dietary patterns among Latinos with type 2 diabetes.	Public Health Nutr. 2017	28803581		0	-		-	-	-	-		PubMed	0	0
Early Regression of Carotid Intima-Media Thickness after Bariatric Surgery and Its Relation to Serum Leptin Reduction.	Obes Surg. 2018	28803396		0	-		-	-	-	-		PubMed	0	0
Optimal dietary macronutrient distribution in China (ODMDC): a randomised controlled-feeding trial protocol.	Asia Pac J Clin Nutr. 2017	28802307		0	-		-	-	-	-		PubMed	0	0
Type 2 Diabetes Mellitus and Impaired Renal Function Are Associated With Brain Alterations and Poststroke Cognitive Decline.	Stroke. 2017	28801477		0	-		-	-	-	-		PubMed	0	0
Understanding the Gap Between Efficacy in Randomized Controlled Trials and Effectiveness in Real-World Use of GLP-1 RA and DPP-4 Therapies in Patients With Type 2 Diabetes.	Diabetes Care. 2017	28801475		0	-		-	-	-	-		PubMed	0	0
Association Between Adherence to Pharmacotherapy and Outcomes in Type 2 Diabetes: A Meta-analysis.	Diabetes Care. 2017	28801474		0	-		-	-	-	-		PubMed	0	0
Type 2 Diabetes in the Real World: The Elusive Nature of Glycemic Control.	Diabetes Care. 2017	28801473		0	-		-	-	-	-		PubMed	0	0
The Effect of Buffering High Acid Load Meal with Sodium Bicarbonate on Postprandial Glucose Metabolism in Humans-A Randomized Placebo-Controlled Study.	Nutrients. 2017	28800090		0	-		-	-	-	-		PubMed	0	0
Sustained virological response by direct antiviral agents in HCV leads to an early and significant improvement of liver fibrosis.	Antivir Ther. 2017	28799522		0	-		-	-	-	-		PubMed	0	0
The prevalence of diabetes-specific emotional distress in people with Type 2 diabetes: a systematic review and meta-analysis.	Diabet Med. 2017	28799294		0	-		-	-	-	-		PubMed	0	0
Uncontrolled diabetes and health care utilisation: panel data evidence from Spain.	Eur J Health Econ. 2017	28799036		0	-		-	-	-	-		PubMed	0	0
Risk of low-energy fracture in type 2 diabetes patients: a meta-analysis of observational studies.	Osteoporos Int. 2017	28795239		0	-		-	-	-	-		PubMed	0	0
Dietary variables associated with substantial postpartum weight retention at 1-year among women with GDM pregnancy.	BMC Obes. 2017	28794888		0	-		-	-	-	-		PubMed	0	0
Overview of Glucagon-Like Peptide-1 Receptor Agonists for the Treatment of Patients with Type 2 Diabetes.	Am Health Drug Benefits. 2017	28794822		0	-		-	-	-	-		PubMed	0	0
Type 2 diabetes specialty clinic model for the accountable care organization era.	J Diabetes Complications. 2017	28793967		0	-		-	-	-	-		PubMed	0	0
Prevention of diabetes in overweight/obese children through a family based intervention program including supervised exercise (PREDIKID project): study protocol for a randomized controlled trial.	Trials. 2017	28793919		0	-		-	-	-	-		PubMed	0	0
Beyond HbA1c.	J Diabetes. 2017	28792665		0	-		-	-	-	-		PubMed	0	0
Combined Interval Training and Post-exercise Nutrition in Type 2 Diabetes: A Randomized Control Trial.	Front Physiol. 2017	28790929		0	-		-	-	-	-		PubMed	0	0
A Team-Based Online Game Improves Blood Glucose Control in Veterans With Type 2 Diabetes: A Randomized Controlled Trial.	Diabetes Care. 2017	28790131		0	-		-	-	-	-		PubMed	0	0
Qualitative analysis of feedback on functional imagery training: A novel motivational intervention for type 2 diabetes.	Psychol Health. 2017	28786698		0	-		-	-	-	-		PubMed	0	0
Safety and efficacy of semaglutide once weekly vs sitagliptin once daily, both as monotherapy in Japanese people with type 2 diabetes.	Diabetes Obes Metab. 2018	28786547		0	-		-	-	-	-		PubMed	0	0
Efficacy and safety of teneligliptin added to canagliflozin monotherapy in Japanese patients with type 2 diabetes mellitus: A multicentre, randomized, double-blind, placebo-controlled, parallel-group comparative study.	Diabetes Obes Metab. 2018	28786530		0	-		-	-	-	-		PubMed	0	0
The bile acid-sequestering resin sevelamer eliminates the acute GLP-1 stimulatory effect of endogenously released bile acids in patients with type 2 diabetes.	Diabetes Obes Metab. 2018	28786523		0	-		-	-	-	-		PubMed	0	0
Almonds ameliorate glycemic control in Chinese patients with better controlled type 2 diabetes: a randomized, crossover, controlled feeding trial.	Nutr Metab (Lond). 2017	28785295		0	-		-	-	-	-		PubMed	0	0
Predictors and prognostic impact of silent coronary artery disease in asymptomatic high-risk patients with diabetes mellitus.	Int J Cardiol. 2017	28784453		0	-		-	-	-	-		PubMed	0	0
Effectiveness of a low-fructose and/or low-sucrose diet in decreasing insulin resistance (DISFRUTE study): study protocol for a randomized controlled trial.	Trials. 2017	28784181		0	-		-	-	-	-		PubMed	0	0
Meta-analysis of the association between the Trp64Arg polymorphism of the beta-3 adrenergic receptor and susceptibility to gestational diabetes mellitus.	J Obstet Gynaecol. 2018	28783993		0	-		-	-	-	-		PubMed	0	0
Dermatoglyphic meta-analysis indicates early epigenetic outcomes & possible implications on genomic zygosity in type-2 diabetes.	F1000Res. 2015	28781742		0	-		-	-	-	-		PubMed	0	0
Prevalence of Metabolically Healthy Obesity (MHO) and its relation with incidence of metabolic syndrome, hypertension and type 2 Diabetes amongst individuals aged over 20 years in Ahvaz: A 5 Year cohort Study (2009-2014).	Diabetes Metab Syndr. 2017	28781161		0	-		-	-	-	-		PubMed	0	0
Cardiovascular mortality and morbidity in patients with type 2 diabetes following initiation of sodium-glucose co-transporter-2 inhibitors versus other glucose-lowering drugs (CVD-REAL Nordic): a multinational observational analysis.	Lancet Diabetes Endocrinol. 2017	28781064		0	-		-	-	-	-		PubMed	0	0
Prevention of type 2 diabetes with the traditional Chinese patent medicine: A systematic review and meta-analysis.	Diabetes Res Clin Pract. 2017	28780370		0	-		-	-	-	-		PubMed	0	0
Fasting Glucose and the Risk of Depressive Symptoms: Instrumental-Variable Regression in the Cardiovascular Risk in Young Finns Study.	Int J Behav Med. 2017	28779468		0	-		-	-	-	-		PubMed	0	0
A Web-Based Public Health Intervention to Reduce Functional Impairment and Depressive Symptoms in Adults With Type 2 Diabetes (The SpringboarD Trial): Randomized Controlled Trial Protocol.	JMIR Res Protoc. 2017	28778848		0	-		-	-	-	-		PubMed	0	0
Metformin treatment significantly enhances intestinal glucose uptake in patients with type 2 diabetes: Results from a randomized clinical trial.	Diabetes Res Clin Pract. 2017	28778047		0	-		-	-	-	-		PubMed	0	0
A Mixed-Methods Study on Acceptability, Tolerability, and Substitution of Brown Rice for White Rice to Lower Blood Glucose Levels among Nigerian Adults.	Front Nutr. 2017	28775984		0	-		-	-	-	-		PubMed	0	0
STK11 rs2075604 Polymorphism Is Associated with Metformin Efficacy in Chinese Type 2 Diabetes Mellitus.	Int J Endocrinol. 2017	28775741		0	-		-	-	-	-		PubMed	0	0
Validity and reliability of a Malay version of the brief illness perception questionnaire for patients with type 2 diabetes mellitus.	BMC Med Res Methodol. 2017	28774271		0	-		-	-	-	-		PubMed	0	0
The Relationship Between Sleep Duration and Glycemic Control Among Hispanic Adults With Uncontrolled Type 2 Diabetes.	Diabetes Educ. 2017	28774259		0	-		-	-	-	-		PubMed	0	0
Food sources of sodium, saturated fat, and added sugar in the Physical Activity and Nutrition for Diabetes in Alberta (PANDA) trial.	Appl Physiol Nutr Metab. 2017	28772082		0	-		-	-	-	-		PubMed	0	0
Testosterone replacement therapy: improved sexual desire and erectile function in men with type 2 diabetes following a 30-week randomized placebo-controlled study.	Andrology. 2017	28771964		0	-		-	-	-	-		PubMed	0	0
Impact of clinical evidence communications and drug regulation changes concerning rosiglitazone on prescribing patterns of antidiabetic therapies.	Pharmacoepidemiol Drug Saf. 2017	28771933		0	-		-	-	-	-		PubMed	0	0
cAMP/PKA signaling pathway contributes to neuronal apoptosis via regulating IDE expression in a mixed model of type 2 diabetes and Alzheimer's disease.	J Cell Biochem. 2018	28771808		0	-		-	-	-	-		PubMed	0	0
Nonsteroidal mineralocorticoid antagonists in diabetic kidney disease.	Curr Opin Nephrol Hypertens. 2017	28771453		0	-		-	-	-	-		PubMed	0	0
Effect of liraglutide on myocardial glucose uptake and blood flow in stable chronic heart failure patients: A double-blind, randomized, placebo-controlled LIVE sub-study.	J Nucl Cardiol. 2017	28770459		0	-		-	-	-	-		PubMed	0	0
Association between organic food consumption and metabolic syndrome: cross-sectional results from the NutriNet-SantÃ© study.	Eur J Nutr. 2017	28770334		0	-		-	-	-	-		PubMed	0	0
Effect of the interaction between diet composition and the PPM1K genetic variant on insulin resistance and Î² cell function markers during weight loss: results from the Nutrient Gene Interactions in Human Obesity: implications for dietary guidelines (NUGENOB) randomized trial.	Am J Clin Nutr. 2017	28768654		0	-		-	-	-	-		PubMed	0	0
Effects of Sodium-Glucose Cotransporter 2 Inhibitors for the Treatment of Patients With Heart Failure: Proposal of a Novel Mechanism of Action.	JAMA Cardiol. 2017	28768320		0	-		-	-	-	-		PubMed	0	0
Effects of folic acid supplementation on serum homocysteine levels, lipid profiles, and vascular parameters in post-menopausal Korean women with type 2 diabetes mellitus.	Nutr Res Pract. 2017	28765779		0	-		-	-	-	-		PubMed	0	0
Changes in cerebral metabolites in type 2 diabetes mellitus: A meta-analysis of proton magnetic resonance spectroscopy.	J Clin Neurosci. 2017	28765058		0	-		-	-	-	-		PubMed	0	0
Correlates of physical activity and sitting time in adults with type 2 diabetes attending primary health care in Oman.	BMC Public Health. 2017	28764700		0	-		-	-	-	-		PubMed	0	0
Effectiveness of a stepped-care intervention to prevent major depression in patients with type 2 diabetes mellitus and/or coronary heart disease and subthreshold depression: A pragmatic cluster randomized controlled trial.	PLoS One. 2017	28763451		0	-		-	-	-	-		PubMed	0	0
Glucose-lowering effect of whey protein depends upon clinical characteristics of patients with type 2 diabetes.	BMJ Open Diabetes Res Care. 2017	28761664		0	-		-	-	-	-		PubMed	0	0
Which foods are displaced in the diets of adults with type 2 diabetes with the inclusion of eggs in their diets? A randomized, controlled, crossover trial.	BMJ Open Diabetes Res Care. 2017	28761662		0	-		-	-	-	-		PubMed	0	0
Type 2 diabetes patient's perspective on Ramadan fasting: a qualitative study.	BMJ Open Diabetes Res Care. 2017	28761651		0	-		-	-	-	-		PubMed	0	0
Discovering successful strategies for diabetic self-management: a qualitative comparative study.	BMJ Open Diabetes Res Care. 2017	28761649		0	-		-	-	-	-		PubMed	0	0
Clinical profile of patients with type 2 diabetes mellitus treated with sodium- glucose cotransporter-2 inhibitors and experience in real-world clinical practice in Spain.	Med Clin (Barc). 2016	28760223		0	-		-	-	-	-		PubMed	0	0
The risk of new-onset diabetes in antidepressant users - A systematic review and meta-analysis.	PLoS One. 2017	28759599		0	-		-	-	-	-		PubMed	0	0
Venous Ulcers Treated With a Hyaluronic Acid Extracellular Matrix and Compression Therapy: Interim Analysis of a Randomized Controlled Trial.	Wounds. 2017	28759431		0	-		-	-	-	-		PubMed	0	0
Persuasive Effects of Point of View, Protagonist Competence, and Similarity in a Health Narrative About Type 2 Diabetes.	J Health Commun. 2017	28759317		0	-		-	-	-	-		PubMed	0	0
Intermittent hypoxia training in prediabetes patients: Beneficial effects on glucose homeostasis, hypoxia tolerance and gene expression.	Exp Biol Med (Maywood). 2017	28758418		0	-		-	-	-	-		PubMed	0	0
The Association of Haptoglobin Gene Variants and Retinopathy in Type 2 Diabetic Patients: A Meta-Analysis.	J Diabetes Res. 2017	28758129		0	-		-	-	-	-		PubMed	0	0
Weight loss in the prevention and treatment of diabetes.	Prev Med. 2017	28757449		0	-		-	-	-	-		PubMed	0	0
Risk accuracy of type 2 diabetes in middle aged adults: Associations with sociodemographic, clinical, psychological and behavioural factors.	Patient Educ Couns. 2018	28757303		0	-		-	-	-	-		PubMed	0	0
Efficacy and safety of empagliflozin in Japanese patients with type 2 diabetes mellitus: A sub-analysis by body mass index and age of pooled data from three clinical trials.	Diabetes Res Clin Pract. 2017	28753486		0	-		-	-	-	-		PubMed	0	0
Autologous bone marrow derived stem cell therapy in patients with type 2 diabetes mellitus - defining adequate administration methods.	World J Diabetes. 2017	28751962		0	-		-	-	-	-		PubMed	0	0
Comparison of Ipragliflozin and Pioglitazone Effects on Nonalcoholic Fatty Liver Disease in Patients With Type 2 Diabetes: A Randomized, 24-Week, Open-Label, Active-Controlled Trial.	Diabetes Care. 2017	28751548		0	-		-	-	-	-		PubMed	0	0
Recruitment and retention in a 10-month social network-based intervention promoting diabetes self-management in socioeconomically deprived patients: a qualitative process evaluation.	BMJ Open. 2017	28751481		0	-		-	-	-	-		PubMed	0	0
Comparative effects of microvascular and macrovascular disease on the risk of major outcomes in patients with type 2 diabetes.	Cardiovasc Diabetol. 2017	28750645		0	-		-	-	-	-		PubMed	0	0
Are women with type 2 diabetes mellitus more susceptible to cardiovascular complications following coronary angioplasty?: a meta-analysis.	BMC Cardiovasc Disord. 2017	28750607		0	-		-	-	-	-		PubMed	0	0
Self-reported Hypoglycaemic Events in 2â€‰430 Patients with Insulin-treated Diabetes in the German Sub-population of the HAT Study.	Exp Clin Endocrinol Diabetes. 2017	28750429		0	-		-	-	-	-		PubMed	0	0
Continuous glucose monitoring detected hypoglycaemia in the Treating to Target in Type 2 Diabetes Trial (4-T).	Diabetes Res Clin Pract. 2017	28750219		0	-		-	-	-	-		PubMed	0	0
Efficacy of low carbohydrate diet for type 2 diabetes mellitus management: A systematic review and meta-analysis of randomized controlled trials.	Diabetes Res Clin Pract. 2017	28750216		0	-		-	-	-	-		PubMed	0	0
Cranberries improve postprandial glucose excursions in type 2 diabetes.	Food Funct. 2017	28748974		0	-		-	-	-	-		PubMed	0	0
Microvascular effects of glucagon-like peptide-1 receptor agonists in type 2 diabetes: a meta-analysis of randomized controlled trials.	Acta Diabetol. 2017	28748377		0	-		-	-	-	-		PubMed	0	0
Hypoglycemic effects of tramadol analgesia in hospitalized patients: a case-control study.	J Diabetes Metab Disord. 2017	28748177		0	-		-	-	-	-		PubMed	0	0
Implementation findings from a hybrid III implementation-effectiveness trial of the Diabetes Prevention Program (DPP) in the Veterans Health Administration (VHA).	Implement Sci. 2017	28747191		0	-		-	-	-	-		PubMed	0	0
Comparison of machine-learning algorithms to build a predictive model for detecting undiagnosed diabetes - ELSA-Brasil: accuracy study.	Sao Paulo Med J. 2017	28746659		0	-		-	-	-	-		PubMed	0	0
Barriers to Patient Use of Control Solution for Glucose Meters: Surveys of Patients, Pharmacists, and Providers in a Metropolitan Area.	J Diabetes Sci Technol. 2017	28745089		0	-		-	-	-	-		PubMed	0	0
Meta-analysis of gene-environment interaction exploiting gene-environment independence across multiple case-control studies.	Stat Med. 2017	28744888		0	-		-	-	-	-		PubMed	0	0
Glycemic and Metabolic Effects of Two Long Bouts of Moderate-Intensity Exercise in Men with Normal Glucose Tolerance or Type 2 Diabetes.	Front Endocrinol (Lausanne). 2017	28744255		0	-		-	-	-	-		PubMed	0	0
SGLT-2 Inhibition: A Potential New Treatment for Diabetic Kidney Disease?	Nephron. 2017	28743130		0	-		-	-	-	-		PubMed	0	0
Update on SGLT2 Inhibitors-New Data Released at the American Diabetes Association.	Crit Pathw Cardiol. 2017	28742644		0	-		-	-	-	-		PubMed	0	0
Efficacy and safety of lixisenatide in a predominantly Asian population with type 2 diabetes insufficiently controlled with basal insulin: The GetGoal-L-C randomized trial.	Diabetes Obes Metab. 2018	28742225		0	-		-	-	-	-		PubMed	0	0
Pancreatic size and fat content in diabetes: A systematic review and meta-analysis of imaging studies.	PLoS One. 2017	28742102		0	-		-	-	-	-		PubMed	0	0
Effects of Oral and Non-Insulin Injectable Antidiabetic Treatment in Hypertension: A Systematic Review.	Curr Pharm Des. 2017	28741456		0	-		-	-	-	-		PubMed	0	0
Efficacy and safety of teneligliptin add-on to insulin monotherapy in Japanese patients with type 2 diabetes mellitus: a 16-week, randomized, double-blind, placebo-controlled trial with an open-label period.	Expert Opin Pharmacother. 2017	28741385		0	-		-	-	-	-		PubMed	0	0
Testosterone and the Heart.	Methodist Debakey Cardiovasc J. 2017	28740585		0	-		-	-	-	-		PubMed	0	0
Cholecalciferol improves glycemic control in type 2 diabetic patients: a 6-month prospective interventional study.	Ther Clin Risk Manag. 2017	28740392		0	-		-	-	-	-		PubMed	0	0
Changes in dietary intake following a culturally adapted lifestyle intervention among Iraqi immigrants to Sweden at high risk of type 2 diabetes: a randomised trial.	Public Health Nutr. 2017	28738912		0	-		-	-	-	-		PubMed	0	0
Acute glycemic and pressure responses of continuous and interval aerobic exercise in patients with type 2 diabetes.	Clin Exp Hypertens. 2018	28737464		0	-		-	-	-	-		PubMed	0	0
Glycaemic control and hypoglycaemia in people with type 2 diabetes switching from twice-daily basal insulin to once-daily insulin glargine 300 U/mL or insulin glargine 100 U/mL (EDITION 1 and EDITION 2 subgroup analysis).	Diabetes Obes Metab. 2018	28736942		0	-		-	-	-	-		PubMed	0	0
Efficacy and safety of Gegen Qinlian decoction for normalizing hyperglycemia in diabetic patients: A systematic review and meta-analysis of randomized clinical trials.	Complement Ther Med. 2017	28735827		0	-		-	-	-	-		PubMed	0	0
Curcuminoids modify lipid profile in type 2 diabetes mellitus: A randomized controlled trial.	Complement Ther Med. 2017	28735818		0	-		-	-	-	-		PubMed	0	0
Intensive lifestyle intervention is particularly advantageous in poorly controlled type 2 diabetes.	Nutr Metab Cardiovasc Dis. 2017	28735815		0	-		-	-	-	-		PubMed	0	0
The clinical features and treatment outcome of chronic hepatitis C with pegylated interferon and ribavirin in routine care.	Med J Malaysia. 2017	28733564		0	-		-	-	-	-		PubMed	0	0
Comment on Muka et al. Associations of Steroid Sex Hormones and Sex Hormone-Binding Globulin With the Risk of Type 2 Diabetes in Women: A Population-Based Cohort Study and Meta-analysis. Diabetes 2017;66:577-586.	Diabetes. 2017	28733310		0	-		-	-	-	-		PubMed	0	0
Metformin and longevity (METAL): a window of opportunity study investigating the biological effects of metformin in localised prostate cancer.	BMC Cancer. 2017	28732480		0	-		-	-	-	-		PubMed	0	0
Process evaluation of a patient-centred, patient-directed, group-based education program for the management of type 2 diabetes mellitus.	Nutr Diet. 2017	28731607		0	-		-	-	-	-		PubMed	0	0
Dietary intake and factors influencing eating behaviours in overweight and obese South Asian men living in the UK: mixed method study.	BMJ Open. 2017	28729327		0	-		-	-	-	-		PubMed	0	0
The effects of physical activity interventions on glycated haemoglobin A1c in non-diabetic populations: a protocol for a systematic review and meta-analysis.	BMJ Open. 2017	28729317		0	-		-	-	-	-		PubMed	0	0
Effectiveness of resistance exercise compared to aerobic exercise without insulin therapy in patients with type 2 diabetes mellitus: a meta-analysis.	Braz J Phys Ther. 2017	28728958		0	-		-	-	-	-		PubMed	0	0
Leveraging a Clinical Phase Ib Proof-of-Concept Study for the GPR40 Agonist MK-8666 in Patients With Type 2 Diabetes for Model-Informed Phase II Dose Selection.	Clin Transl Sci. 2017	28727908		0	-		-	-	-	-		PubMed	0	0
Acceptability of a very-low-energy diet in Type 2 diabetes: patient experiences and behaviour regulation.	Diabet Med. 2017	28727247		0	-		-	-	-	-		PubMed	0	0
A randomized controlled trial on a nurse-led smartphone-based self-management programme for people with poorly controlled type 2 diabetes: A study protocol.	J Adv Nurs. 2018	28727183		0	-		-	-	-	-		PubMed	0	0
A randomized controlled trial comparing the effects of dapagliflozin and DPP-4 inhibitors on glucose variability and metabolic parameters in patients with type 2 diabetes mellitus on insulin.	Diabetol Metab Syndr. 2017	28725273		0	-		-	-	-	-		PubMed	0	0
Galantamine alleviates inflammation and insulin resistance in patients with metabolic syndrome in a randomized trial.	JCI Insight. 2017	28724799		0	-		-	-	-	-		PubMed	0	0
The effect of magnesium supplementation on blood pressure in individuals with insulin resistance, prediabetes, or noncommunicable chronic diseases: a meta-analysis of randomized controlled trials.	Am J Clin Nutr. 2017	28724644		0	-		-	-	-	-		PubMed	0	0
Randomized double-blinded pilot clinical study of the antidiabetic activity of Balanites aegyptiaca and UPLC-ESI-MS/MS identification of its metabolites.	Pharm Biol. 2017	28724331		0	-		-	-	-	-		PubMed	0	0
Efficacy and Safety of GLP-1 Receptor Agonists Across the Spectrum of Type 2 Diabetes Mellitus.	Exp Clin Endocrinol Diabetes. 2017	28724168		0	-		-	-	-	-		PubMed	0	0
Cost and Health Care Utilization Implications of Bariatric Surgery Versus Intensive Lifestyle and Medical Intervention for Type 2 Diabetes.	Obesity (Silver Spring). 2017	28722299		0	-		-	-	-	-		PubMed	0	0
High prevalence of erectile dysfunction in diabetes: a systematic review and meta-analysis of 145 studies.	Diabet Med. 2017	28722225		0	-		-	-	-	-		PubMed	0	0
Branched-chain amino acid, meat intake and risk of type 2 diabetes in the Women's Health Initiative.	Br J Nutr. 2017	28721839		0	-		-	-	-	-		PubMed	0	0
Beneficial effects of n-3 polyunsaturated fatty acids on adiponectin levels and AdipoR gene expression in patients with type 2 diabetes mellitus: a randomized, placebo-controlled, double-blind clinical trial.	Arch Med Sci. 2017	28721137		0	-		-	-	-	-		PubMed	0	0
Contribution of family social support to the metabolic control of people with diabetes mellitus: A randomized controlled clinical trial.	Appl Nurs Res. 2017	28720242		0	-		-	-	-	-		PubMed	0	0
An information and communication technology-based centralized clinical trial to determine the efficacy and safety of insulin dose adjustment education based on a smartphone personal health record application: a randomized controlled trial.	BMC Med Inform Decis Mak. 2017	28720103		0	-		-	-	-	-		PubMed	0	0
Luseogliflozin improves liver fat deposition compared to metformin in type 2 diabetes patients with non-alcoholic fatty liver disease: A prospective randomized controlled pilot study.	Diabetes Obes Metab. 2018	28719078		0	-		-	-	-	-		PubMed	0	0
Comparative efficacy and safety of gemigliptin versus linagliptin in type 2 diabetes patients with renal impairment: A 40-week extension of the GUARD randomized study.	Diabetes Obes Metab. 2018	28719008		0	-		-	-	-	-		PubMed	0	0
Dose Comparison And Side Effect Profile Of Metformin Extended Release Versus Metformin Immediate Release.	J Ayub Med Coll Abbottabad. 2017	28718236		0	-		-	-	-	-		PubMed	0	0
Nonnutritive sweeteners and cardiometabolic health: a systematic review and meta-analysis of randomized controlled trials and prospective cohort studies.	CMAJ. 2017	28716847		0	-		-	-	-	-		PubMed	0	0
Diabetes Mellitus, Microalbuminuria, and Subclinical Cardiac Disease: Identification and Monitoring of Individuals at Risk of Heart Failure.	J Am Heart Assoc. 2017	28716801		0	-		-	-	-	-		PubMed	0	0
Exercise individualized by TRIMPi method reduces arterial stiffness in early onset type 2 diabetic patients: A randomized controlled trial with aerobic interval training.	Int J Cardiol. 2017	28716522		0	-		-	-	-	-		PubMed	0	0
Partial jejunal diversion using an incisionless magnetic anastomosis system: 1-year interim results in patients with obesity and diabetes.	Gastrointest Endosc. 2017	28716404		0	-		-	-	-	-		PubMed	0	0
Smoking and the risk of type 2 diabetes in Japan: A systematic review and meta-analysis.	J Epidemiol. 2017	28716381		0	-		-	-	-	-		PubMed	0	0
Walnut consumption increases activation of the insula to highly desirable food cues: A randomized, double-blind, placebo-controlled, cross-over fMRI study.	Diabetes Obes Metab. 2018	28715141		0	-		-	-	-	-		PubMed	0	0
Vitamin D Supplementation Enhances C18(dihydro)ceramide Levels in Type 2 Diabetes Patients.	Int J Mol Sci. 2017	28714882		0	-		-	-	-	-		PubMed	0	0
The efficacy and safety of adding either vildagliptin or glimepiride to ongoing metformin therapy in patients with type 2 diabetes mellitus.	Expert Opin Pharmacother. 2017	28714741		0	-		-	-	-	-		PubMed	0	0
Concurrent Aerobic and Resistance Training Has Anti-Inflammatory Effects and Increases Both Plasma and Leukocyte Levels of IGF-1 in Late Middle-Aged Type 2 Diabetic Patients.	Oxid Med Cell Longev. 2017	28713486		0	-		-	-	-	-		PubMed	0	0
E-healthcare for Diabetes Mellitus Type 2 Patients - A Randomised Controlled Trial in Slovenia.	Zdr Varst. 2017	28713443		0	-		-	-	-	-		PubMed	0	0
Insulin Sensitivity To Trace Metals (Chromium, Manganese) In Type 2 Diabetic Patients And Non Diabetic Individuals.	J Ayub Med Coll Abbottabad. 2016	28712229		0	-		-	-	-	-		PubMed	0	0
Comparison Of Lipid Lowering Effect Of Extra Virgin Olive Oil And Atorvastatin In Dyslipidaemia In Type 2 Diabetes Mellitus.	J Ayub Med Coll Abbottabad. 2017	28712181		0	-		-	-	-	-		PubMed	0	0
Targeting weight loss interventions to reduce cardiovascular complications of type 2 diabetes: a machine learning-based post-hoc analysis of heterogeneous treatment effects in the Look AHEAD trial.	Lancet Diabetes Endocrinol. 2017	28711469		0	-		-	-	-	-		PubMed	0	0
Eicosapentaenoic and Docosahexaenoic Acids Attenuate Progression of Albuminuria in Patients With Type 2 Diabetes Mellitus and Coronary Artery Disease.	J Am Heart Assoc. 2017	28710178		0	-		-	-	-	-		PubMed	0	0
The impact of a social network based intervention on self-management behaviours among patients with type 2 diabetes living in socioeconomically deprived neighbourhoods: a mixed methods approach.	Scand J Public Health. 2017	28707567		0	-		-	-	-	-		PubMed	0	0
Poor clinical response in rheumatoid arthritis is the main risk factor for diabetes development in the short-term: A 1-year, single-centre, longitudinal study.	PLoS One. 2017	28704564		0	-		-	-	-	-		PubMed	0	0
Meta-analyses of the association of G6PC2 allele variants with elevated fasting glucose and type 2 diabetes.	PLoS One. 2017	28704540		0	-		-	-	-	-		PubMed	0	0
Association between the vitamin D receptor gene polymorphisms and diabetic nephropathy risk: A meta-analysis.	Nephrology (Carlton). 2018	28703918		0	-		-	-	-	-		PubMed	0	0
Clinical effects, cardiovascular and renal outcomes associated with rapid-acting insulin analogs among individuals with type 2 diabetes: a nation-wide observational cohort study.	Clin Diabetes Endocrinol. 2017	28702259		0	-		-	-	-	-		PubMed	0	0
Cardiovascular safety assessment of pramlintide in type 2 diabetes: results from a pooled analysis of five clinical trials.	Clin Diabetes Endocrinol. 2016	28702246		0	-		-	-	-	-		PubMed	0	0
Educ@dom: comparative study of the telemonitoring of patients with type 2 diabetes versus standard monitoring-study protocol for a randomized controlled study.	Diabetol Metab Syndr. 2017	28702091		0	-		-	-	-	-		PubMed	0	0
Does the ingestion of a 24Â hour low glycaemic index Asian mixed meal diet improve glycaemic response and promote fat oxidation? A controlled, randomized cross-over study.	Nutr J. 2017	28701162		0	-		-	-	-	-		PubMed	0	0
Reduction of diabetes-related distress predicts improved depressive symptoms: A secondary analysis of the DIAMOS study.	PLoS One. 2017	28700718		0	-		-	-	-	-		PubMed	0	0
Enhancing pediatric clinical trial feasibility through the use of Bayesian statistics.	Pediatr Res. 2017	28700566		0	-		-	-	-	-		PubMed	0	0
Electronic messaging intervention for management of cardiovascular risk factors in type 2 diabetes mellitus: A randomised controlled trial.	J Clin Nurs. 2018	28700102		0	-		-	-	-	-		PubMed	0	0
Effectiveness of Digital Medicines to Improve Clinical Outcomes in Patients with Uncontrolled Hypertension and Type 2 Diabetes: Prospective, Open-Label, Cluster-Randomized Pilot Clinical Trial.	J Med Internet Res. 2017	28698169		0	-		-	-	-	-		PubMed	0	0
The Role of Laboratory Testing in Differentiating Type 1 Diabetes from Type 2 Diabetes in Patients Undergoing Bariatric Surgery.	Obes Surg. 2018	28695457		0	-		-	-	-	-		PubMed	0	0
The Real-Life Effectiveness and Care Patterns of Diabetes Management Study for Balkan Region (Slovenia, Croatia, Serbia, Bulgaria): A Multicenter, Observational, Cross-Sectional Study.	Diabetes Ther. 2017	28695415		0	-		-	-	-	-		PubMed	0	0
Prevalence of metabolic syndrome, discrete or comorbid diabetes and hypertension in sub-Saharan Africa among people living with HIV versus HIV-negative populations: a systematic review and meta-analysis protocol.	BMJ Open. 2017	28694350		0	-		-	-	-	-		PubMed	0	0
Active children through individual vouchers - evaluation (ACTIVE): protocol for a mixed method randomised control trial to increase physical activity levels in teenagers.	BMC Public Health. 2017	28693484		0	-		-	-	-	-		PubMed	0	0
Can we go beyond surrogates?	J Diabetes. 2017	28692750		0	-		-	-	-	-		PubMed	0	0
The magnitude of weight loss induced by metformin is independently associated with BMI at baseline in newly diagnosed type 2 diabetes: Post-hoc analysis from data of a phase IV open-labeled trial.	Adv Clin Exp Med. 2017	28691423		0	-		-	-	-	-		PubMed	0	0
Bayesian adaptive dose-escalation designs for simultaneously estimating the optimal and maximum safe dose based on safety and efficacy.	Pharm Stat. 2017	28691311		0	-		-	-	-	-		PubMed	0	0
Aquatic exercise for adults with type 2 diabetes: a meta-analysis.	Acta Diabetol. 2017	28691156		0	-		-	-	-	-		PubMed	0	0
Autologous bone marrow-derived mononuclear cells transplantation in type 2 diabetes mellitus: effect on Î²-cell function and insulin sensitivity.	Diabetol Metab Syndr. 2017	28690682		0	-		-	-	-	-		PubMed	0	0
Effects of Supervised Structured Aerobic Exercise Training Program on Interleukin-6, Nitric Oxide Synthase-1, and Cyclooxygenase-2 in Type 2 Diabetes Mellitus.	J Coll Physicians Surg Pak. 2017	28689524		0	-		-	-	-	-		PubMed	0	0
Co-administration of a konjac-based fibre blend and American ginseng (Panax quinquefolius L.) on glycaemic control and serum lipids in type 2 diabetes: a randomized controlled, cross-over clinical trial.	Eur J Nutr. 2017	28687934		0	-		-	-	-	-		PubMed	0	0
The association between total phthalate concentration and non-communicable diseases and chronic inflammation in South Australian urban dwelling men.	Environ Res. 2017	28686951		0	-		-	-	-	-		PubMed	0	0
Non-skeletal health effects of vitamin D supplementation: A systematic review on findings from meta-analyses summarizing trial data.	PLoS One. 2017	28686645		0	-		-	-	-	-		PubMed	0	0
Prevalence of and risk factors for diabetic ketosis in Chinese diabetic patients with random blood glucose levels >13.9â€‰mmol/L: Results from the CHina study in prEvalence of diabetiC Ketosis (CHECK) study.	J Diabetes. 2017	28685968		0	-		-	-	-	-		PubMed	0	0
Does SGLT2 inhibition with dapagliflozin overcome individual therapy resistance to RAAS inhibition?	Diabetes Obes Metab. 2018	28685934		0	-		-	-	-	-		PubMed	0	0
Effects of Vildagliptin or Pioglitazone on Glycemic Variability and Oxidative Stress in Patients with Type 2 Diabetes Inadequately Controlled with Metformin Monotherapy: A 16-Week, Randomised, Open Label, Pilot Study.	Endocrinol Metab (Seoul). 2017	28685513		0	-		-	-	-	-		PubMed	0	0
Cardiac Stress and Inflammatory Markers as Predictors of Heart Failure in Patients With Type 2 Diabetes: The ADVANCE Trial.	Diabetes Care. 2017	28684396		0	-		-	-	-	-		PubMed	0	0
Effectiveness of dapagliflozin on vascular endothelial function and glycemic control in patients with early-stage type 2 diabetes mellitus: DEFENCE study.	Cardiovasc Diabetol. 2017	28683796		0	-		-	-	-	-		PubMed	0	0
Inhibition of IKKÉ› and TBK1 Improves Glucose Control in a Subset of Patients with Type 2 Diabetes.	Cell Metab. 2017	28683283		0	-		-	-	-	-		PubMed	0	0
PREVALENCE OF DIABETES IN GREATER BEIRUT AREA: WORSENING OVER TIME.	Endocr Pract. 2017	28683240		0	-		-	-	-	-		PubMed	0	0
Apelin administration improves insulin sensitivity in overweight men during hyperinsulinaemic-euglycaemic clamp.	Diabetes Obes Metab. 2018	28681996		0	-		-	-	-	-		PubMed	0	0
Metformin-associated prevention of weight gain in insulin-treated type 2 diabetic patients cannot be explained by decreased energy intake: A post hoc analysis of a randomized placebo-controlled 4.3-year trial.	Diabetes Obes Metab. 2018	28681986		0	-		-	-	-	-		PubMed	0	0
Independent tissue contributors to obesity-associated insulin resistance.	JCI Insight. 2017	28679946		0	-		-	-	-	-		PubMed	0	0
Economic evaluation of a community-based diagnostic pathway to stratify adults for non-alcoholic fatty liver disease: a Markov model informed by a feasibility study.	BMJ Open. 2017	28679676		0	-		-	-	-	-		PubMed	0	0
Association of Body Mass Index With Cardiometabolic Disease in the UK Biobank: A Mendelian Randomization Study.	JAMA Cardiol. 2017	28678979		0	-		-	-	-	-		PubMed	0	0
The Effect of Intentional Weight Loss on Fracture Risk in Persons With Diabetes: Results From the Look AHEAD Randomized Clinical Trial.	J Bone Miner Res. 2017	28678345		0	-		-	-	-	-		PubMed	0	0
Effect of different blood glucose intervention plans on elderly people with type 2 diabetes mellitus combined with dementia.	Eur Rev Med Pharmacol Sci. 2017	28678332		0	-		-	-	-	-		PubMed	0	0
Antihyperglycemic agents and cardiovascular outcomes: recent insights.	Curr Opin Cardiol. 2017	28678048		0	-		-	-	-	-		PubMed	0	0
Chromium supplementation for adjuvant treatment of type 2 diabetes mellitus: Results from a pooled analysis.	Mol Nutr Food Res. 2018	28677892		0	-		-	-	-	-		PubMed	0	0
Can serum uric acid lowering therapy contribute to the prevention or treatment of nonalcoholic fatty liver disease?	Curr Vasc Pharmacol. 2017	28676018		0	-		-	-	-	-		PubMed	0	0
Protein Multiplexed Immunoassay Analysis with R.	Methods Mol Biol. 2017	28674907		0	-		-	-	-	-		PubMed	0	0
A high sucrose and high fat diet induced the development of insulin resistance in the skeletal muscle of Bama miniature pigs through the Akt/GLUT4 pathway.	Exp Anim. 2017	28674285		0	-		-	-	-	-		PubMed	0	0
Dietary and physical activity strategies to prevent type 2 diabetes in South Asian adults: protocol for a systematic review.	BMJ Open. 2017	28674123		0	-		-	-	-	-		PubMed	0	0
Effectiveness of a targeted lifestyle intervention in primary care on diet and physical activity among South Asians at risk for diabetes: 2-year results of a randomised controlled trial in the Netherlands.	BMJ Open. 2017	28674122		0	-		-	-	-	-		PubMed	0	0
Metformin exerts anti-obesity effect via gut microbiome modulation in prediabetics: A hypothesis.	Med Hypotheses. 2017	28673568		0	-		-	-	-	-		PubMed	0	0
Testosterone therapy of men with type 2 diabetes mellitus - a randomized, double-blinded, placebo-controlled study.	Dan Med J. 2017	28673384		0	-		-	-	-	-		PubMed	0	0
Newly diagnosed obstructive sleep apnoea and type 2 diabetes mellitus.	Dan Med J. 2017	28673378		0	-		-	-	-	-		PubMed	0	0
Fish oil supplementation and insulin sensitivity: a systematic review and meta-analysis.	Lipids Health Dis. 2017	28673352		0	-		-	-	-	-		PubMed	0	0
Effect of Insulin Degludec vs Insulin Glargine U100 on Hypoglycemia in Patients With Type 2 Diabetes: The SWITCH 2 Randomized Clinical Trial.	JAMA. 2017	28672317		0	-		-	-	-	-		PubMed	0	0
Baseline red blood cell distribution width predicts long-term glycemic remission in patients with type 2 diabetes.	Diabetes Res Clin Pract. 2017	28672172		0	-		-	-	-	-		PubMed	0	0
The Effect of Yoga and Peer Support Interventions on the Quality of Life of Women with Diabetes: Results of a Randomized Controlled Trial.	Indian J Endocrinol Metab. 2017	28670534		0	-		-	-	-	-		PubMed	0	0
Prevalence of Diabetic Retinopathy and Blindness in Indonesian Adults With Type 2 Diabetes.	Am J Ophthalmol. 2017	28669781		0	-		-	-	-	-		PubMed	0	0
A randomized controlled trial on the efficacy of resistant dextrin, as functional food, in women with type 2 diabetes: Targeting the hypothalamic-pituitary-adrenal axis and immune system.	Clin Nutr. 2017	28669666		0	-		-	-	-	-		PubMed	0	0
Effects of canagliflozin, an SGLT2 inhibitor, on hepatic function in Japanese patients with type 2 diabetes mellitus: pooled and subgroup analyses of clinical trials.	J Gastroenterol. 2018	28669071		0	-		-	-	-	-		PubMed	0	0
A Practical Guide to the Use of Glucose-Lowering Agents With Cardiovascular Benefit or Proven Safety.	Can J Cardiol. 2017	28668144		0	-		-	-	-	-		PubMed	0	0
Differential Treatment Response to Insulin Intensification Therapy: A Post Hoc Analysis of a Randomized Trial Comparing Premixed and Basal-Bolus Insulin Regimens.	Diabetes Ther. 2017	28667381		0	-		-	-	-	-		PubMed	0	0
Type 2 diabetes, glucose, insulin, BMI, and ischemic stroke subtypes: Mendelian randomization study.	Neurology. 2017	28667182		0	-		-	-	-	-		PubMed	0	0
Non-locomotive physical activity intervention using a tri-axial accelerometer reduces sedentary time in type 2 diabetes.	Phys Sportsmed. 2017	28664755		0	-		-	-	-	-		PubMed	0	0
Adherence to a lifestyle program for youth with type 2 diabetes and its association with treatment outcome in the TODAY clinical trial.	Pediatr Diabetes. 2017	28664624		0	-		-	-	-	-		PubMed	0	0
Clustering high-dimensional mixed data to uncover sub-phenotypes: joint analysis of phenotypic and genotypic data.	Stat Med. 2017	28664564		0	-		-	-	-	-		PubMed	0	0
Effects of sodium-glucose co-transporter 2 (SGLT2) inhibition on renal function and albuminuria in patients with type 2 diabetes: a systematic review and meta-analysis.	PeerJ. 2017	28663934		0	-		-	-	-	-		PubMed	0	0
Sodium nitrate ingestion increases skeletal muscle nitrate content in humans.	J Appl Physiol (1985). 2017	28663382		0	-		-	-	-	-		PubMed	0	0
What works best for whom? Cognitive Behavior Therapy and Mindfulness-Based Cognitive Therapy for depressive symptoms in patients with diabetes.	PLoS One. 2017	28662208		0	-		-	-	-	-		PubMed	0	0
Fiber-rich diet with brown rice improves endothelial function in type 2 diabetes mellitus: A randomized controlled trial.	PLoS One. 2017	28662074		0	-		-	-	-	-		PubMed	0	0
A Community Health Worker-Delivered Intervention in African American Women with Type 2 Diabetes: A 12-Month Randomized Trial.	Obesity (Silver Spring). 2017	28660719		0	-		-	-	-	-		PubMed	0	0
A Comparison of Inpatient Cost Per Day in General Surgery Patients with Type 2 Diabetes Treated with Basal-Bolus versus Sliding Scale Insulin Regimens.	Pharmacoecon Open. 2017	28660256		0	-		-	-	-	-		PubMed	0	0
System Level Meta-analysis of Microarray Datasets for Elucidation of Diabetes Mellitus Pathobiology.	Curr Genomics. 2017	28659725		0	-		-	-	-	-		PubMed	0	0
Acupuncture paired with herbal medicine for prediabetes: study protocol for a randomized controlled trial.	Trials. 2017	28659162		0	-		-	-	-	-		PubMed	0	0
Advanced glycation end products (AGEs) increase renal lipid accumulation: a pathogenic factor of diabetic nephropathy (DN).	Lipids Health Dis. 2017	28659153		0	-		-	-	-	-		PubMed	0	0
Prevalence of Non Alcoholic Fatty Liver Disease and its Association with Diabetic Nephropathy in Patients with Type 2 Diabetes Mellitus.	J Clin Diagn Res. 2017	28658824		0	-		-	-	-	-		PubMed	0	0
Combination SGLT2 inhibitor and GLP-1 receptor agonist therapy: a complementary approach to the treatment of type 2 diabetes.	Postgrad Med. 2017	28657399		0	-		-	-	-	-		PubMed	0	0
Alprostadil protects type 2 diabetes mellitus patients treated with metformin from contrast-induced nephropathy.	Int Urol Nephrol. 2017	28656510		0	-		-	-	-	-		PubMed	0	0
Effects of Synbiotic Food Consumption on Serum Minerals, Liver Enzymes, and Blood Pressure in Patients with Type 2 Diabetes: A Double-blind Randomized Cross-over Controlled Clinical Trial.	Int J Prev Med. 2017	28656099		0	-		-	-	-	-		PubMed	0	0
Clinical application of ghrelin for diabetic peripheral neuropathy.	Endocr J. 2017	28652546		0	-		-	-	-	-		PubMed	0	0
Development and testing of a mobile application to support diabetes self-management for people with newly diagnosed type 2 diabetes: a design thinking case study.	BMC Med Inform Decis Mak. 2017	28651639		0	-		-	-	-	-		PubMed	0	0
Evaluating the short-term cost-effectiveness of liraglutide versus lixisenatide in patients with type 2 diabetes in the United States.	J Med Econ. 2017	28651479		0	-		-	-	-	-		PubMed	0	0
AR C-106T gene polymorphism and diabetic nephropathy in the Eastern Asians with T2DM: A meta-analysis including 2120 subjects.	Diabetes Res Clin Pract. 2017	28651212		0	-		-	-	-	-		PubMed	0	0
Adherence to Diabetes Dietary Guidelines Assessed Using a Validated Questionnaire Predicts Glucose Control in Adults With Type 2 Diabetes.	Can J Diabetes. 2018	28648765		0	-		-	-	-	-		PubMed	0	0
Translation, Revision, and Validation of the Diabetes Distress Scale for Indonesian Type 2 Diabetic Outpatients with Various Types of Complications.	Value Health Reg Issues. 2017	28648318		0	-		-	-	-	-		PubMed	0	0
Effect of dipeptidyl peptidase-4 inhibitors on circulating tumor necrosis factor-Î± concentrations: A systematic review and meta-analysis of controlled trials.	J Diabetes Complications. 2017	28647512		0	-		-	-	-	-		PubMed	0	0
The effects of amoxicillin and vancomycin on parameters reflecting cholesterol metabolism.	Chem Phys Lipids. 2017	28647339		0	-		-	-	-	-		PubMed	0	0
Predictive value of body mass index to metabolic syndrome risk factors in Syrian adolescents.	J Med Case Rep. 2017	28646923		0	-		-	-	-	-		PubMed	0	0
Effect of ezetimibe add-on therapy over 52Â weeks extension analysis of prospective randomized trial (RESEARCH study) in type 2 diabetes subjects.	Lipids Health Dis. 2017	28646901		0	-		-	-	-	-		PubMed	0	0
Efficacy of Additional Canagliflozin Administration to Type 2 Diabetes Patients Receiving Insulin Therapy: Examination of Diurnal Glycemic Patterns Using Continuous Glucose Monitoring (CGM).	Diabetes Ther. 2017	28646412		0	-		-	-	-	-		PubMed	0	0
Efficacy of an education course delivered to community health workers in diabetes control: A randomized clinical trial.	Endocrine. 2017	28646377		0	-		-	-	-	-		PubMed	0	0
Within-class differences in cancer risk for sulfonylurea treatments in patients with type 2 diabetes (ZODIAC-55) - a study protocol.	BMC Cancer. 2017	28645260		0	-		-	-	-	-		PubMed	0	0
Insulin degludec/liraglutide (IDegLira) was effective across a range of dysglycaemia and body mass index categories in the DUAL V randomized trial.	Diabetes Obes Metab. 2018	28643425		0	-		-	-	-	-		PubMed	0	0
The association between circulating fetuin-A levels and type 2 diabetes mellitus risk: systematic review and meta-analysis of observational studies.	J Endocrinol Invest. 2018	28643299		0	-		-	-	-	-		PubMed	0	0
Actinidia chinensis Planch. Improves the Indices of Antioxidant and Anti-Inflammation Status of Type 2 Diabetes Mellitus by Activating Keap1 and Nrf2 via the Upregulation of MicroRNA-424.	Oxid Med Cell Longev. 2017	28642811		0	-		-	-	-	-		PubMed	0	0
Association of the Composite Inflammatory Biomarker GlycA, with Exercise-Induced Changes in Body Habitus in Men and Women with Prediabetes.	Oxid Med Cell Longev. 2017	28642810		0	-		-	-	-	-		PubMed	0	0
Efficacy of ezetimibe combined with atorvastatin in the treatment of carotid artery plaque in patients with type 2 diabetes mellitus complicated with coronary heart disease.	Int Angiol. 2017	28641407		0	-		-	-	-	-		PubMed	0	0
Sugar sweetened beverages and cardiometabolic health.	Curr Opin Cardiol. 2017	28639973		0	-		-	-	-	-		PubMed	0	0
Community health workers in diabetes care: A systematic review of randomized controlled trials.	Fam Syst Health. 2017	28639794		0	-		-	-	-	-		PubMed	0	0
Effect of Probiotics on Glucose and Lipid Metabolism in Type 2 Diabetes Mellitus: A Meta-Analysis of 12 Randomized Controlled Trials.	Med Sci Monit. 2017	28638006		0	-		-	-	-	-		PubMed	0	0
Cardiovascular Disease and Type 2 Diabetes: Has the Dawn of a New Era Arrived?	Diabetes Care. 2017	28637886		0	-		-	-	-	-		PubMed	0	0
Harnessing basic and clinic tools to evaluate SGLT2 inhibitor nephrotoxicity.	Am J Physiol Renal Physiol. 2017	28637789		0	-		-	-	-	-		PubMed	0	0
High Serum Phospholipid Dihomo-Î³-Linoleic Acid Concentration and Low Î”5-Desaturase Activity Are Associated with Increased Risk of Type 2 Diabetes among Japanese Adults in the Hitachi Health Study.	J Nutr. 2017	28637686		0	-		-	-	-	-		PubMed	0	0
Views of general practice staff about the use of a patient-oriented treatment decision aid in shared decision making for patients with type 2 diabetes: A mixed-methods study.	Health Expect. 2018	28636186		0	-		-	-	-	-		PubMed	0	0
Timing of food intake during simulated night shift impacts glucose metabolism: A controlled study.	Chronobiol Int. 2017	28635334		0	-		-	-	-	-		PubMed	0	0
Network meta-analysis of liraglutide versus dipeptidyl peptidase-4 inhibitors for the treatment of type 2 diabetes in Japanese patients.	Curr Med Res Opin. 2017	28635331		0	-		-	-	-	-		PubMed	0	0
Targeting risk factors for type 2 diabetes in American Indian youth: the Tribal Turning Point pilot study.	Pediatr Obes. 2017	28635082		0	-		-	-	-	-		PubMed	0	0
Exercise Metabolism in Nonobese Patients with Type 2 Diabetes Following the Acute Restoration of Normoglycaemia.	J Diabetes Res. 2017	28634587		0	-		-	-	-	-		PubMed	0	0
PREVIEW: Prevention of Diabetes through Lifestyle Intervention and Population Studies in Europe and around the World. Design, Methods, and Baseline Participant Description of an Adult Cohort Enrolled into a Three-Year Randomised Clinical Trial.	Nutrients. 2017	28632180		0	-		-	-	-	-		PubMed	0	0
Long-term follow-up of a hospital-based, multi-intervention programme in type 2 diabetes mellitus: impact on cardiovascular events and death.	J Int Med Res. 2017	28627980		0	-		-	-	-	-		PubMed	0	0
Glycemic index, glycemic load and insulin response of two formulas of isoglucose with different sweeteners and dietary fiber in healthy adults and type-2 diabetes	Nutr Hosp. 2017	28627186		0	-		-	-	-	-		PubMed	0	0
Overweight, obesity, and risk of cardiometabolic multimorbidity: pooled analysis of individual-level data for 120â€ˆ813 adults from 16 cohort studies from the USA and Europe.	Lancet Public Health. 2017	28626830		0	-		-	-	-	-		PubMed	0	0
Prioritizing disease-causing microbes based on random walking on the heterogeneous network.	Methods. 2017	28625914		0	-		-	-	-	-		PubMed	0	0
Long-term Cost-effectiveness of Two GLP-1 Receptor Agonists for the Treatment of Type 2 Diabetes Mellitus in the Italian Setting: Liraglutide Versus Lixisenatide.	Clin Ther. 2017	28625506		0	-		-	-	-	-		PubMed	0	0
Long-term Lifestyle-modification Programs for Overweight and Obesity Management in the Arab States: Systematic Review and Meta-analysis.	Curr Diabetes Rev. 2017	28625131		0	-		-	-	-	-		PubMed	0	0
Improving diabetes care at primary care level with a multistrategic approach: results of the DIAPREM programme.	Acta Diabetol. 2017	28624898		0	-		-	-	-	-		PubMed	0	0
Prevalence and treatment of atherogenic dyslipidemia in the primary prevention of cardiovascular disease in Europe: EURIKA, a cross-sectional observational study.	BMC Cardiovasc Disord. 2017	28623902		0	-		-	-	-	-		PubMed	0	0
Pioglitazone and the Risk of Bladder Cancer: A Meta-Analysis.	Diabetes Ther. 2017	28623552		0	-		-	-	-	-		PubMed	0	0
Effects of Canagliflozin on Cardiovascular Biomarkers in Older Adults With Type 2Â Diabetes.	J Am Coll Cardiol. 2017	28619659		0	-		-	-	-	-		PubMed	0	0
Pilot randomized controlled trial of a mindfulness-based group intervention in adolescent girls at risk for type 2 diabetes with depressive symptoms.	Complement Ther Med. 2017	28619307		0	-		-	-	-	-		PubMed	0	0
Safety and metabolic effects of tesamorelin, a growth hormone-releasing factor analogue, in patients with type 2 diabetes: A randomized, placebo-controlled trial.	PLoS One. 2017	28617838		0	-		-	-	-	-		PubMed	0	0
Ipragliflozin Reduces Epicardial Fat Accumulation in Non-Obese Type 2 Diabetic Patients with Visceral Obesity: A Pilot Study.	Diabetes Ther. 2017	28616806		0	-		-	-	-	-		PubMed	0	0
Effects of Insulin Plus Glucagon-Like Peptide-1 Receptor Agonists (GLP-1RAs) in Treating Type 1 Diabetes Mellitus: A Systematic Review and Meta-Analysis.	Diabetes Ther. 2017	28616805		0	-		-	-	-	-		PubMed	0	0
Daytime napping and risk of type 2 diabetes: a meta-analysis of prospective studies.	Sleep Breath. 2017	28612266		0	-		-	-	-	-		PubMed	0	0
Atherosclerosis associated with dynamic inflammation changes after multifactorial intervention in short-duration type 2 diabetes: A randomized, controlled, 10-year follow-up trial.	J Diabetes Complications. 2017	28610945		0	-		-	-	-	-		PubMed	0	0
A risk-score model for predicting risk of type 2 diabetes mellitus in a rural Chinese adult population: A cohort study with a 6-year follow-up.	Diabetes Metab Res Rev. 2017	28608942		0	-		-	-	-	-		PubMed	0	0
The impact of educational intervention on physical activity, nutrition and laboratory parameters in type II diabetic patients.	Electron Physician. 2017	28607657		0	-		-	-	-	-		PubMed	0	0
Comparative effects of carbohydrate versus fat restriction on metabolic profiles, biomarkers of inflammation and oxidative stress in overweight patients with Type 2 diabetic and coronary heart disease: A randomized clinical trial.	ARYA Atheroscler. 2016	28607566		0	-		-	-	-	-		PubMed	0	0
Baseline Circulating FGF21 Concentrations and Increase after Fenofibrate Treatment Predict More Rapid Glycemic Progression in Type 2 Diabetes: Results from the FIELD Study.	Clin Chem. 2017	28606915		0	-		-	-	-	-		PubMed	0	0
EMPA-REG OUTCOME: The Nephrologist's Point of View.	Am J Cardiol. 2017	28606346		0	-		-	-	-	-		PubMed	0	0
High intake of fatty fish, but not of lean fish, improved postprandial glucose regulation and increased the n-3 PUFA content in the leucocyte membrane in healthy overweight adults: a randomised trial.	Br J Nutr. 2017	28606215		0	-		-	-	-	-		PubMed	0	0
Evaluation of the impact of once weekly dulaglutide on patient-reported outcomes in Japanese patients with type 2 diabetes: comparisons with liraglutide, insulin glargine, and placebo in two randomized studies.	Health Qual Life Outcomes. 2017	28606095		0	-		-	-	-	-		PubMed	0	0
Effect of Home Blood Pressure on Inducing Remission/Regression of Microalbuminuria in Patients With Type 2 Diabetes Mellitus.	Am J Hypertens. 2017	28605498		0	-		-	-	-	-		PubMed	0	0
The Durability of Basal Insulin Affects Day-to-Day Glycemic Variability Assessed by Continuous Glucose Monitoring in Type 2 Diabetes Patients: A Randomized Crossover Trial.	Diabetes Technol Ther. 2017	28605286		0	-		-	-	-	-		PubMed	0	0
Assessment of risk of type 2 diabetes using the Indian Diabetes Risk Score in an urban slum of Pune, Maharashtra, India: a cross-sectional study.	WHO South East Asia J Public Health. 2016	28604399		0	-		-	-	-	-		PubMed	0	0
How can point-of-care HbA1c testing be integrated into UK primary care consultations? - A feasibility study.	Diabetes Res Clin Pract. 2017	28602811		0	-		-	-	-	-		PubMed	0	0
Age at menarche and cardiovascular risk factors using Mendelian randomization in the Guangzhou Biobank Cohort Study.	Prev Med. 2017	28601624		0	-		-	-	-	-		PubMed	0	0
Finding the Optimal volume and intensity of Resistance Training Exercise for Type 2 Diabetes: The FORTE Study, a Randomized Trial.	Diabetes Res Clin Pract. 2017	28601003		0	-		-	-	-	-		PubMed	0	0
Dulce Digital: An mHealth SMS-Based Intervention Improves Glycemic Control in Hispanics With Type 2 Diabetes.	Diabetes Care. 2017	28600309		0	-		-	-	-	-		PubMed	0	0
Creating a sustainable collaborative consumer health application for chronic disease self-management.	J Biomed Inform. 2017	28600025		0	-		-	-	-	-		PubMed	0	0
ESRD After Heart Failure, Myocardial Infarction, or Stroke in TypeÂ 2 Diabetic Patients With CKD.	Am J Kidney Dis. 2017	28599901		0	-		-	-	-	-		PubMed	0	0
Multiple effects of probiotics on different types of diabetes: a systematic review and meta-analysis of randomized, placebo-controlled trials.	J Pediatr Endocrinol Metab. 2017	28599375		0	-		-	-	-	-		PubMed	0	0
Effects of Exercise on Type 2 Diabetes Mellitus-Related Cognitive Impairment andÂ Dementia.	J Alzheimers Dis. 2017	28598841		0	-		-	-	-	-		PubMed	0	0
Effects of progressive resistance training and weight loss versus weight loss alone on inflammatory and endothelial biomarkers in older adults with type 2 diabetes.	Eur J Appl Physiol. 2017	28597102		0	-		-	-	-	-		PubMed	0	0
A Double-Blinded Randomized Study Investigating a Possible Anti-Inflammatory Effect of Saxagliptin versus Placebo as Add-On Therapy in Patients with Both Type 2 Diabetes And Stable Coronary Artery Disease.	Mediators Inflamm. 2017	28596642		0	-		-	-	-	-		PubMed	0	0
Quality measure and weight loss assessment in patients with type 2 diabetes mellitus treated with canagliflozin or dipeptidyl peptidase-4 inhibitors.	BMC Endocr Disord. 2017	28595617		0	-		-	-	-	-		PubMed	0	0
Fructose replacement of glucose or sucrose in food or beverages lowers postprandial glucose and insulin without raising triglycerides: a systematic review and meta-analysis.	Am J Clin Nutr. 2017	28592611		0	-		-	-	-	-		PubMed	0	0
Interaction between genes and macronutrient intake on the risk of developing type 2 diabetes: systematic review and findings from European Prospective Investigation into Cancer (EPIC)-InterAct.	Am J Clin Nutr. 2017	28592605		0	-		-	-	-	-		PubMed	0	0
Chronic fructose substitution for glucose or sucrose in food or beverages has little effect on fasting blood glucose, insulin, or triglycerides: a systematic review and meta-analysis.	Am J Clin Nutr. 2017	28592603		0	-		-	-	-	-		PubMed	0	0
Pilot Feasibility Study of a Digital Storytelling Intervention for Immigrant and Refugee Adults With Diabetes.	Diabetes Educ. 2017	28592205		0	-		-	-	-	-		PubMed	0	0
A Randomized, Placebo-Controlled Trial Evaluating the Safety and Efficacy of Adding Omarigliptin to Antihyperglycemic Therapies in Japanese Patients with Type 2 Diabetes and Inadequate Glycemic Control.	Diabetes Ther. 2017	28589493		0	-		-	-	-	-		PubMed	0	0
Effect of symbiotic supplementation on glycemic control, lipid profiles and microalbuminuria in patients with non-obese type 2 diabetes: a randomized, double-blind, clinical trial.	J Diabetes Metab Disord. 2017	28589103		0	-		-	-	-	-		PubMed	0	0
Common therapeutic target for both cancer and obesity.	World J Biol Chem. 2017	28588753		0	-		-	-	-	-		PubMed	0	0
Effects of Ramadan fasting on platelet reactivity in diabetic patients treated with clopidogrel.	Thromb J. 2017	28588426		0	-		-	-	-	-		PubMed	0	0
Effects of SGLT2 inhibitors on UTIs and genital infections in type 2 diabetes mellitus: a systematic review and meta-analysis.	Sci Rep. 2017	28588220		0	-		-	-	-	-		PubMed	0	0
The Hoorn Diabetes Care System (DCS) cohort. A prospective cohort of persons with type 2 diabetes treated in primary care in the Netherlands.	BMJ Open. 2017	28588112		0	-		-	-	-	-		PubMed	0	0
The effect of trimetazidine treatment in patients with type 2 diabetes undergoing percutaneous coronary intervention for AMI.	Am J Emerg Med. 2017	28587952		0	-		-	-	-	-		PubMed	0	0
The effects of basal insulin peglispro vs. insulin glargine on lipoprotein particles by NMR and liver fat content by MRI in patients with diabetes.	Cardiovasc Diabetol. 2017	28587667		0	-		-	-	-	-		PubMed	0	0
Herbal acupuncture for type 2 diabetes: A meta-analysis.	Exp Ther Med. 2017	28587397		0	-		-	-	-	-		PubMed	0	0
Effect of n-3 Polyunsaturated Fatty Acid Supplementation on Metabolic and Inflammatory Biomarkers in Type 2 Diabetes Mellitus Patients.	Nutrients. 2017	28587203		0	-		-	-	-	-		PubMed	0	0
Effects of the Tangningtongluo formula as an alternative strategy for diabetics via upregulation of insulin receptor substrate-1.	Mol Med Rep. 2017	28586073		0	-		-	-	-	-		PubMed	0	0
Continuous Glucose Monitoring with Multiple Daily Insulin Treatment: Outcome Studies.	Diabetes Technol Ther. 2017	28585875		0	-		-	-	-	-		PubMed	0	0
Effect of green tea on metabolic and hormonal aspect of polycystic ovarian syndrome in overweight and obese women suffering from polycystic ovarian syndrome: A clinical trial.	J Educ Health Promot. 2017	28584836		0	-		-	-	-	-		PubMed	0	0
Prognostic Value of Variability in Systolic Blood Pressure Related to Vascular Events and Premature Death in Type 2 Diabetes Mellitus: The ADVANCE-ON Study.	Hypertension. 2017	28584014		0	-		-	-	-	-		PubMed	0	0
Studies on glycoxidatively modified human IgG: Implications in immuno-pathology of type 2 diabetes mellitus.	Int J Biol Macromol. 2017	28583871		0	-		-	-	-	-		PubMed	0	0
Effects of metformin exposure on neurodegenerative diseases in elderly patients with type 2 diabetes mellitus.	Prog Neuropsychopharmacol Biol Psychiatry. 2017	28583443		0	-		-	-	-	-		PubMed	0	0
Do effects of sodium-glucose cotransporter-2 inhibitors in patients with diabetes give insight into potential use in non-diabetic kidney disease?	Curr Opin Nephrol Hypertens. 2017	28582367		0	-		-	-	-	-		PubMed	0	0
PPARs: regulators of metabolism and as therapeutic targets in cardiovascular disease. Part II: PPAR-Î²/Î´ and PPAR-Î³.	Future Cardiol. 2017	28581362		0	-		-	-	-	-		PubMed	0	0
The Impact of Probiotic Soy Milk Consumption on Oxidative Stress Among Type 2 Diabetic Kidney Disease Patients: A Randomized Controlled Clinical Trial.	J Ren Nutr. 2017	28579313		0	-		-	-	-	-		PubMed	0	0
Effect of increased water intake on plasma copeptin in healthy adults.	Eur J Nutr. 2017	28578535		0	-		-	-	-	-		PubMed	0	0
Dual renin-angiotensin system blockade for nephroprotection.	Nephrol Ther. 2017	28577742		0	-		-	-	-	-		PubMed	0	0
Association of endometrial hyperplasia and cancer with a history of gestational diabetes.	Cancer Causes Control. 2017	28577154		0	-		-	-	-	-		PubMed	0	0
Effects of saxagliptin on glucose homeostasis and body composition of obese patients with newly diagnosed pre-diabetes.	Diabetes Res Clin Pract. 2017	28575729		0	-		-	-	-	-		PubMed	0	0
Liver Safety of Statins in Prediabetes or T2DM and Nonalcoholic Steatohepatitis: Post Hoc Analysis of a Randomized Trial.	J Clin Endocrinol Metab. 2017	28575232		0	-		-	-	-	-		PubMed	0	0
The Relationship Between the Score on a Simple Measure of Cognitive Function and Incident CVD in People With Diabetes: A Post Hoc Epidemiological Analysis From the ACCORD-MIND Study.	J Clin Endocrinol Metab. 2017	28575229		0	-		-	-	-	-		PubMed	0	0
Oligosaccharide Sensing in Aqueous Media by Porphyrin-Curdlan Conjugates: A PrÃªt-Ã¡-Porter Rather Than Haute-Couture Approach.	Chemistry. 2017	28574186		0	-		-	-	-	-		PubMed	0	0
Effect of moderate-intensity aerobic exercise on glycosylated haemoglobin among elderly patients with type 2 diabetes & peripheral neuropathy.	Indian J Med Res. 2017	28574026		0	-		-	-	-	-		PubMed	0	0
Once-weekly administration of a long-acting fibroblast growth factor 21 analogue modulates lipids, bone turnover markers, blood pressure and body weight differently in obese people with hypertriglyceridaemia and in non-human primates.	Diabetes Obes Metab. 2017	28573777		0	-		-	-	-	-		PubMed	0	0
Association between dairy intake, lipids and vascular structure and function in diabetes.	World J Diabetes. 2017	28572881		0	-		-	-	-	-		PubMed	0	0
Unacylated ghrelin modulates circulating angiogenic cell number in insulin-resistant states.	Diabetol Metab Syndr. 2017	28572856		0	-		-	-	-	-		PubMed	0	0
Cognitive ability and physical health: a Mendelian randomization study.	Sci Rep. 2017	28572633		0	-		-	-	-	-		PubMed	0	0
Effects of SGLT-2 inhibitors on diabetic ketoacidosis: A meta-analysis of randomised controlled trials.	Diabetes Res Clin Pract. 2017	28570924		0	-		-	-	-	-		PubMed	0	0
Pasireotide in an insulin-requiring diabetic acromegalic patient without worsening of hyperglycemia.	Endocrinol Diabetes Metab Case Rep. 2017	28567297		0	-		-	-	-	-		PubMed	0	0
The Effects of Pioglitazone on Bone Formation and Resorption Markers in Type 2 Diabetes Mellitus.	Intern Med. 2017	28566590		0	-		-	-	-	-		PubMed	0	0
Weight Changes in General Practice.	Dan Med J. 2017	28566125		0	-		-	-	-	-		PubMed	0	0
Performance of a new real-time continuous glucose monitoring system: A multicenter pilot study.	J Diabetes Investig. 2017	28563974		0	-		-	-	-	-		PubMed	0	0
Nursing appointment and cardiometabolic control of diabetics: a randomized clinical trial.	Rev Bras Enferm. 2017	28562792		0	-		-	-	-	-		PubMed	0	0
Impact of type 2 diabetes mellitus on the long-term mortality in patients who were treated by coronary artery bypass surgery: A systematic review and meta-analysis.	Medicine (Baltimore). 2017	28562555		0	-		-	-	-	-		PubMed	0	0
Incretin-based therapy for type 2 diabetes: What have we learned from the meta-analyses?	Int J Cardiol. 2017	28560966		0	-		-	-	-	-		PubMed	0	0
Effects of a lifestyle intervention on REM sleep-related OSA severity in obese individuals with type 2 diabetes.	J Sleep Res. 2017	28560832		0	-		-	-	-	-		PubMed	0	0
Is antimicrobial photodynamic therapy an effective treatment for chronic periodontitis in diabetes mellitus and cigarette smokers: a systematic review and meta-analysis.	Photodiagnosis Photodyn Ther. 2017	28559203		0	-		-	-	-	-		PubMed	0	0
Fasting serum hippuric acid is elevated after bilberry (Vaccinium myrtillus) consumption and associates with improvement of fasting glucose levels and insulin secretion in persons at high risk of developing type 2 diabetes.	Mol Nutr Food Res. 2017	28556578		0	-		-	-	-	-		PubMed	0	0
Low glycated hemoglobin level is associated with severity of frailty in Japanese elderly diabetes patients.	J Diabetes Investig. 2017	28556518		0	-		-	-	-	-		PubMed	0	0
Design of the Magnetic Resonance Imaging Evaluation of Mineralocorticoid Receptor Antagonism in Diabetic Atherosclerosis (MAGMA) Trial.	Clin Cardiol. 2017	28555959		0	-		-	-	-	-		PubMed	0	0
Role of B-Type Natriuretic Peptide and N-Terminal Prohormone BNP as Predictors of Cardiovascular Morbidity and Mortality in Patients With a Recent Coronary Event and Type 2 Diabetes Mellitus.	J Am Heart Assoc. 2017	28554908		0	-		-	-	-	-		PubMed	0	0
Update of Cardiovascular Effects of Older and Newer Anti-diabetic Medications.	Curr Med Chem. 2017	28554326		0	-		-	-	-	-		PubMed	0	0
Health-related quality-of-life implications of cardiovascular events in individuals with type 2 diabetes mellitus: A subanalysis from the Saxagliptin Assessment of Vascular Outcomes Recorded in Patients with Diabetes Mellitus (SAVOR)-TIMI 53 trial.	Diabetes Res Clin Pract. 2017	28554140		0	-		-	-	-	-		PubMed	0	0
Serum Vaspin Concentration in Elderly Type 2 Diabetes Mellitus Patients with Differing Body Mass Index: A Cross-Sectional Study.	Biomed Res Int. 2017	28553648		0	-		-	-	-	-		PubMed	0	0
The Comparison between Effects of 12 weeks Combined Training and Vitamin D Supplement on Improvement of Sensory-motor Neuropathy in type 2 Diabetic Women.	Adv Biomed Res. 2017	28553628		0	-		-	-	-	-		PubMed	0	0
Diabetes Destiny in our Hands: Achieving Metabolic Karma.	Indian J Endocrinol Metab. 2017	28553610		0	-		-	-	-	-		PubMed	0	0
Effects of metformin extended release compared to immediate release formula on glycemic control and glycemic variability in patients with type 2 diabetes.	Drug Des Devel Ther. 2017	28553078		0	-		-	-	-	-		PubMed	0	0
Efficacy and safety of incretin-based drugs in patients with type 1 diabetes mellitus: A systematic review and meta-analysis.	Diabetes Res Clin Pract. 2017	28552612		0	-		-	-	-	-		PubMed	0	0
Glucose metabolism during rotational shift-work in healthcare workers.	Diabetologia. 2017	28551698		0	-		-	-	-	-		PubMed	0	0
Shifting Paradigms in the Medical Management of Type 2 Diabetes: Reflections on Recent Cardiovascular Outcome Trials.	J Gen Intern Med. 2017	28550608		0	-		-	-	-	-		PubMed	0	0
Dipeptidyl Peptidase 4 Inhibition Stimulates Distal Tubular Natriuresis and Increases in Circulating SDF-1Î±(1-67) in Patients With Type 2 Diabetes.	Diabetes Care. 2017	28550195		0	-		-	-	-	-		PubMed	0	0
Divided consumption of late-night-dinner improves glycemic excursions in patients with type 2 diabetes: A randomized cross-over clinical trial.	Diabetes Res Clin Pract. 2017	28549298		0	-		-	-	-	-		PubMed	0	0
A randomized, double-blind, non-inferiority trial evaluating the efficacy and safety of omarigliptin, a once-weekly DPP-4 inhibitor, or glimepiride in patients with type 2 diabetes inadequately controlled on metformin monotherapy.	Curr Med Res Opin. 2017	28548024		0	-		-	-	-	-		PubMed	0	0
A randomized clinical trial evaluating the efficacy and safety of the once-weekly dipeptidyl peptidase-4 inhibitor omarigliptin in patients with type 2 diabetes inadequately controlled on metformin monotherapy.	Curr Med Res Opin. 2017	28547998		0	-		-	-	-	-		PubMed	0	0
Effect of Sodium-Glucose Cotransport-2 Inhibitors on Blood Pressure in People With Type 2 Diabetes Mellitus: A Systematic Review and Meta-Analysis of 43 Randomized Control Trials With 22 528 Patients.	J Am Heart Assoc. 2017	28546454		0	-		-	-	-	-		PubMed	0	0
Design and rationale of the ODYSSEY DM-DYSLIPIDEMIA trial: lipid-lowering efficacy and safety of alirocumab in individuals with type 2 diabetes and mixed dyslipidaemia at high cardiovascular risk.	Cardiovasc Diabetol. 2017	28545518		0	-		-	-	-	-		PubMed	0	0
Three approaches to glucose monitoring in non-insulin treated diabetes: a pragmatic randomized clinical trial protocol.	BMC Health Serv Res. 2017	28545493		0	-		-	-	-	-		PubMed	0	0
Protective role of physical activity on type 2 diabetes: Analysis of effect modification by race-ethnicity.	J Diabetes. 2018	28544478		0	-		-	-	-	-		PubMed	0	0
Development of a clinical trials version of the Impact of Weight on Quality of Life-Lite questionnaire (IWQOL-Lite Clinical Trials Version): results from two qualitative studies.	Clin Obes. 2017	28544443		0	-		-	-	-	-		PubMed	0	0
Cardiac-diabetes self-management program for Australians and Taiwanese: A randomized blocked design study.	Nurs Health Sci. 2017	28544230		0	-		-	-	-	-		PubMed	0	0
Breaking up sedentary time with seated upper body activity can regulate metabolic health in obese high-risk adults: A randomized crossover trial.	Diabetes Obes Metab. 2017	28544202		0	-		-	-	-	-		PubMed	0	0
Effectiveness of shared goal setting and decision making to achieve treatment targets in type 2 diabetes patients: A cluster-randomized trial (OPTIMAL).	Health Expect. 2017	28544171		0	-		-	-	-	-		PubMed	0	0
Validating the European Health Literacy Survey Questionnaire in people with type 2 diabetes: Latent trait analyses applying multidimensional Rasch modelling and confirmatory factor analysis.	J Adv Nurs. 2017	28543754		0	-		-	-	-	-		PubMed	0	0
Comparative effectiveness of oral antidiabetic drugs in preventing cardiovascular mortality and morbidity: A network meta-analysis.	PLoS One. 2017	28542373		0	-		-	-	-	-		PubMed	0	0
Prevalence of Metabolic Syndrome among Iranian Population: A Systematic Review and Meta-analysis.	Iran J Public Health. 2017	28540261		0	-		-	-	-	-		PubMed	0	0
Comparison of Antidiabetic Medications during the Treatment of Atherosclerosis in T2DM Patients.	Mediators Inflamm. 2017	28539704		0	-		-	-	-	-		PubMed	0	0
Effect of exenatide after short-time intensive insulin therapy on glycaemic remission maintenance in type 2 diabetes patients: a randomized controlled trial.	Sci Rep. 2017	28539618		0	-		-	-	-	-		PubMed	0	0
[truncated: 4,979 more rows]
